# Supplementary material for: Photoinduced intramolecular carbosulfonylation of alkynes: access to sulfone-containing dibenzazepines from sulfur dioxide
Source: Royal Society of Chemistry journal article supplement (doi:10.1039/d0cc07927h), 2021-01-01
Supplement: d0cc07927h1.pdf [file d0cc07927h1.pdf]

# Photoinduced intramolecular carbosulfonylation of alkynes: access to sulfone-containing dibenzazepines from sulfur dioxide

Yanfang Yao,<sup>a,b</sup> Ziqing Yin,<sup>a</sup> Fu-Sheng He,<sup>\*a</sup> Xuwei Qin,<sup>a</sup> Wenlin Xie,<sup>\*b</sup> and Jie Wu<sup>\*a,c,d</sup>

## Supporting Information

1. General experimental methods (S2).
2. General experimental procedure and characterization data (S2-S14).
3. UV/Vis Absorption Spectra (S14).
4. <sup>1</sup>H and <sup>13</sup>C NMR spectra of compounds **3** and **4** (S15-S75).
5. Crystal structure determination of compound **3a** (S76-S77).

## General experimental methods:

Unless otherwise stated, all commercial reagents were used as received. All solvents were dried and distilled according to standard procedures. Flash column chromatography was performed using silica gel (60-Å pore size, 32-63  $\mu\text{m}$ , standard grade). Analytical thin-layer chromatography was performed using glass plates pre-coated with 0.25 mm 230-400 mesh silica gel impregnated with a fluorescent indicator (254 nm). Thin layer chromatography plates were visualized by exposure to ultraviolet light. Organic solutions were concentrated on rotary evaporators at  $\sim 20$  Torr at 25-35  $^{\circ}\text{C}$ . Nuclear magnetic resonance (NMR) spectra are recorded in parts per million from internal tetramethylsilane on the  $\delta$  scale.  $^1\text{H}$  and  $^{13}\text{C}$  NMR spectra were recorded in  $\text{CDCl}_3$  on a Bruker DRX-400 spectrometer operating at 400 MHz and 100 MHz, respectively. All chemical shift values are quoted in ppm and coupling constants quoted in Hz. High resolution mass spectrometry (HRMS) spectra were obtained on a micrOTOF II Instrument.

*General experimental procedure for the reaction of alkynes 1, DABCO $\cdot$ (SO $_2$ ) $_2$ , and aryldiazonium tetrafluoroborates 2.*

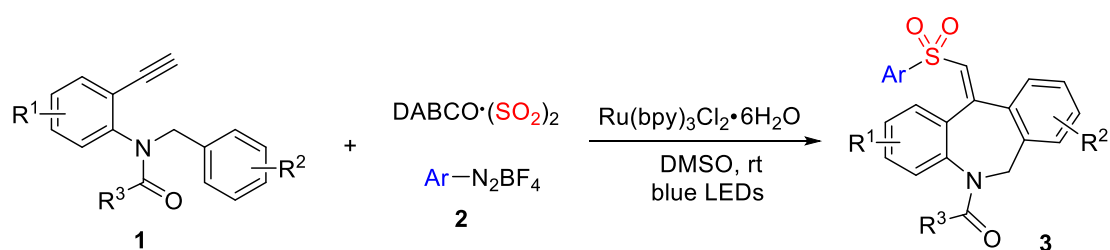

Alkynes **1** (0.2 mmol) was added to a mixture of aryldiazonium tetrafluoroborate **2** (0.3 mmol), DABCO $\cdot$ (SO $_2$ ) $_2$  (0.2 mmol),  $\text{Ru}(\text{bpy})_3\text{Cl}_2 \cdot 6\text{H}_2\text{O}$  (2 mol%) in DMSO (2.0 mL) under  $\text{N}_2$  atmosphere. The mixture was placed around a blue LED (30 W) and stirred under blue light irradiation for 24 h at room temperature. After completion of reaction as indicated by TLC, the reaction mixture was diluted with water (30 mL) then extracted with EtOAc (10 mL  $\times$  3). The organic phases were combined and washed with brine before dried with anhydrous  $\text{Na}_2\text{SO}_4$ . The solvent was then evaporated under reduced pressure and the residue was purified directly by flash column chromatography ( $n$ -hexane/ethyl acetate = 4:1) to give the corresponding product **3**.

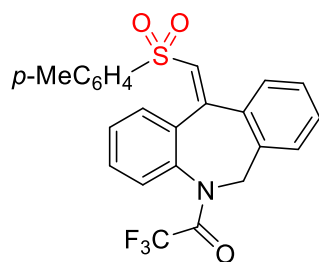

(Z)-2,2,2-Trifluoro-1-(11-(tosylmethylene)-6,11-dihydro-5H-dibenzo[b,e]azepin-5-yl)ethan-1-one (**3a**)

$^1\text{H}$  NMR (400 MHz,  $\text{CDCl}_3$ )  $\delta$  7.76 (d,  $J = 8.2$  Hz, 2H), 7.72 – 7.68 (m, 1H), 7.52 – 7.48 (m, 2H), 7.41 – 7.31 (m, 6H), 7.13 (d,  $J = 7.8$  Hz, 1H), 6.71 (s, 1H), 5.94 (d,  $J = 13.3$  Hz, 1H), 4.33 (d,  $J = 12.4$  Hz, 1H), 2.42 (s, 3H);  $^{13}\text{C}$  NMR (100 MHz,  $\text{CDCl}_3$ )  $\delta$  156.9 (q,  $J = 36.6$  Hz), 149.0, 144.8, 138.0, 135.5, 134.7, 134.3, 134.1, 131.8, 130.8, 130.5, 130.2, 130.0, 129.5, 128.8, 128.2, 127.9, 127.7, 126.2, 116.1 (q,  $J = 288.4$  Hz), 50.7, 21.6;  $^{19}\text{F}$  NMR (376 MHz,  $\text{CDCl}_3$ )  $\delta$  -67.0; IR (KBr,  $\text{cm}^{-1}$ ): 3034, 1699, 1319, 1211, 1147; HRMS (ESI) calcd for  $\text{C}_{24}\text{H}_{18}\text{NO}_3\text{NaSF}_3^+$  ( $\text{M}+\text{Na}^+$ ): 480.0857, found: 480.0866.

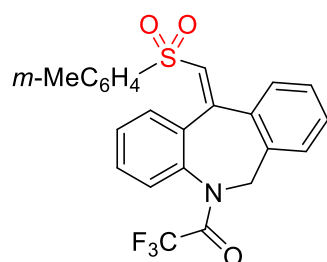

(Z)-2,2,2-Trifluoro-1-(11-((*m*-tolylsulfonyl)methylene)-6,11-dihydro-5H-dibenzo[b,e]azepin-5-yl)ethan-1-one (**3b**)

$^1\text{H}$  NMR (400 MHz,  $\text{CDCl}_3$ )  $\delta$  7.73 – 7.66 (m, 3H), 7.52 – 7.48 (m, 2H), 7.42 – 7.40 (m, 2H), 7.37 (d,  $J = 9.0$  Hz, 1H), 7.32 (dd,  $J = 7.5, 1.4$  Hz, 1H), 7.29 – 7.24 (m, 2H), 7.14 (d,  $J = 7.6$  Hz, 1H), 6.71 (s, 1H), 5.95 (d,  $J = 16.0$  Hz, 1H), 4.34 (d,  $J = 15.9$  Hz, 1H), 2.40 (s, 3H);  $^{13}\text{C}$  NMR (100 MHz,  $\text{CDCl}_3$ )  $\delta$  156.9 (q,  $J = 36.7$  Hz), 149.4, 140.8, 139.8, 135.6, 134.7, 134.5, 134.3, 134.2, 131.7, 130.8, 130.6, 130.3, 129.6, 129.3, 128.9, 128.3, 128.0, 126.3, 124.7, 116.2 (q,  $J = 288.4$  Hz), 50.7, 21.3;  $^{19}\text{F}$  NMR (376 MHz,  $\text{CDCl}_3$ )  $\delta$  -67.0; IR (KBr,  $\text{cm}^{-1}$ ): 3034, 1695, 1318, 1265, 1148; HRMS (ESI) calcd for  $\text{C}_{24}\text{H}_{18}\text{NO}_3\text{NaSF}_3^+$  ( $\text{M}+\text{Na}^+$ ): 480.0857, found: 480.0861.

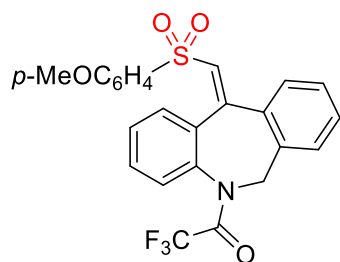

(*Z*)-2,2,2-Trifluoro-1-(11-(((4-methoxyphenyl)sulfonyl)methylene)-6,11-dihydro-5*H*-dibenzo[*b,e*]azepin-5-yl)ethan-1-one (**3c**)

$^1\text{H}$  NMR (400 MHz,  $\text{CDCl}_3$ )  $\delta$  7.81 (d,  $J = 8.9$  Hz, 2H), 7.71 – 7.67 (m, 1H), 7.52 – 7.47 (m, 2H), 7.41 – 7.27 (m, 4H), 7.13 (d,  $J = 7.6$  Hz, 1H), 6.98 (d,  $J = 8.9$  Hz, 2H), 6.70 (s, 1H), 5.94 (d,  $J = 16.3$  Hz, 1H), 4.33 (d,  $J = 16.0$  Hz, 1H), 3.85 (s, 3H);  $^{13}\text{C}$  NMR (100 MHz,  $\text{CDCl}_3$ )  $\delta$  163.8, 156.9 (q,  $J = 36.7$  Hz), 148.4, 135.5, 134.7, 134.3, 134.1, 132.5, 132.1, 130.8, 130.5, 130.2, 129.9, 129.5, 128.8, 128.2, 127.9, 126.2, 116.1 (q,  $J = 288.4$  Hz), 114.6, 55.7, 50.7;  $^{19}\text{F}$  NMR (376 MHz,  $\text{CDCl}_3$ )  $\delta$  -67.0; IR (KBr,  $\text{cm}^{-1}$ ): 3034, 1693, 1318, 1210, 1143, 1088; HRMS (ESI) calcd for  $\text{C}_{24}\text{H}_{18}\text{NO}_4\text{F}_3\text{NaS}^+$  ( $\text{M}+\text{Na}^+$ ): 496.0806, found: 496.0807.

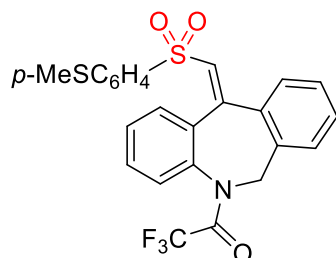

(*Z*)-2,2,2-Trifluoro-1-(11-(((4-(methylthio)phenyl)sulfonyl)methylene)-6,11-dihydro-5*H*-dibenzo[*b,e*]azepin-5-yl)ethan-1-one (**3d**)

$^1\text{H}$  NMR (400 MHz,  $\text{CDCl}_3$ )  $\delta$  7.75 (d,  $J = 8.6$  Hz, 2H), 7.70 – 7.66 (m, 1H), 7.52 – 7.47 (m, 2H), 7.40 – 7.36 (m, 2H), 7.35 – 7.27 (m, 4H), 7.13 (d,  $J = 7.6$  Hz, 1H), 6.70 (s, 1H), 5.94 (d,  $J = 16.4$  Hz, 1H), 4.34 (d,  $J = 16.6$  Hz, 1H), 2.50 (s, 3H);  $^{13}\text{C}$  NMR (100 MHz,  $\text{CDCl}_3$ )  $\delta$  156.8 (q,  $J = 36.7$  Hz), 149.1, 147.4, 136.5, 135.5, 134.7, 134.2, 134.1, 131.7, 130.7, 130.6, 130.3, 129.5, 128.9, 128.2, 127.9, 127.9, 126.2, 125.6, 116.1 (q,  $J = 288.5$  Hz), 50.7, 14.7;  $^{19}\text{F}$  NMR (376 MHz,  $\text{CDCl}_3$ )  $\delta$  -67.0; IR (KBr,  $\text{cm}^{-1}$ ): 3032, 2923, 1702, 1577, 1319, 1152; HRMS (ESI) calcd for  $\text{C}_{24}\text{H}_{18}\text{NO}_3\text{F}_3\text{NaS}_2^+$  ( $\text{M}+\text{Na}^+$ ): 512.0578, found: 512.0579.

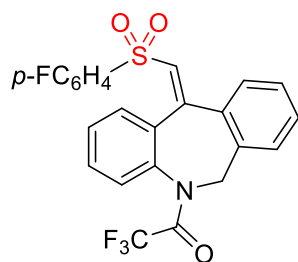

(Z)-2,2,2-Trifluoro-1-(11-(((4-fluorophenyl)sulfonyl)methylene)-6,11-dihydro-5H-dibenzo[b,e]azepin-5-yl)ethan-1-one (**3e**)

$^1\text{H}$  NMR (400 MHz,  $\text{CDCl}_3$ )  $\delta$  7.95 – 7.86 (m, 2H), 7.69 (dd,  $J = 7.0, 1.8$  Hz, 2H), 7.55 – 7.47 (m, 2H), 7.43 – 7.33 (m, 3H), 7.30 – 7.25 (m, 1H), 7.24 – 7.09 (m, 3H), 6.71 (s, 1H), 5.95 (d,  $J = 16.3$  Hz, 1H), 4.34 (d,  $J = 16.5$  Hz, 1H);  $^{13}\text{C}$  NMR (100 MHz,  $\text{CDCl}_3$ )  $\delta$  165.8 (d,  $J = 256.4$  Hz), 156.8 (q,  $J = 36.7$  Hz), 149.9, 137.0 (d,  $J = 3.1$  Hz), 135.5, 134.5, 134.2, 134.1, 131.3, 130.7 (d,  $J = 3.0$  Hz), 130.6, 130.5, 130.4, 129.5, 128.9, 128.3, 128.0, 126.3, 116.7 (d,  $J = 22.7$  Hz), 116.2 (q,  $J = 288.4$  Hz), 50.7;  $^{19}\text{F}$  NMR (376 MHz,  $\text{CDCl}_3$ )  $\delta$  -67.0, -103.3; IR (KBr,  $\text{cm}^{-1}$ ): 3016, 1707, 1485, 1319, 1144; HRMS (ESI) calcd for  $\text{C}_{23}\text{H}_{15}\text{NO}_3\text{F}_4\text{NaS}^+$  ( $\text{M}+\text{Na}^+$ ): 484.0606, found: 484.0612.

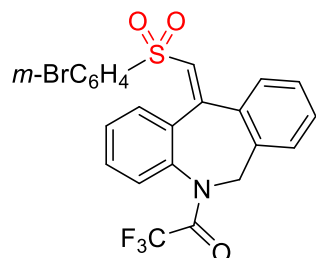

(Z)-1-(11-(((3-Bromophenyl)sulfonyl)methylene)-6,11-dihydro-5H-dibenzo[b,e]azepin-5-yl)-2,2,2-trifluoroethan-1-one (**3f**)

$^1\text{H}$  NMR (400 MHz,  $\text{CDCl}_3$ )  $\delta$  8.03 (s, 1H), 7.80 (d,  $J = 7.9$  Hz, 1H), 7.73 (d,  $J = 8.1$  Hz, 1H), 7.67 (dd,  $J = 7.2, 1.7$  Hz, 1H), 7.50 (td,  $J = 6.6, 1.5$  Hz, 2H), 7.40 (m, 3H), 7.34 (dd,  $J = 7.5, 1.3$  Hz, 1H), 7.29 (d,  $J = 7.3$  Hz, 1H), 7.15 (d,  $J = 7.5$  Hz, 1H), 6.71 (s, 1H), 5.95 (d,  $J = 16.2$  Hz, 1H), 4.34 (d,  $J = 16.0$  Hz, 1H);  $^{13}\text{C}$  NMR (100 MHz,  $\text{CDCl}_3$ )  $\delta$  156.8 (q,  $J = 36.7$  Hz), 150.7, 142.8, 136.8, 135.5, 134.4, 134.3, 134.0, 131.0, 130.8, 130.7, 130.6, 130.5, 129.6, 128.9, 128.4, 128.1, 126.4, 126.2, 123.4, 116.2 (q,  $J = 288.4$  Hz), 50.7;  $^{19}\text{F}$  NMR (376 MHz,  $\text{CDCl}_3$ )  $\delta$  -67.0; IR (KBr,  $\text{cm}^{-1}$ ): 3020, 1690, 1327, 1208, 1147; HRMS (ESI) calcd for  $\text{C}_{23}\text{H}_{15}\text{NO}_3\text{F}_3\text{NaSBr}^+$  ( $\text{M}+\text{Na}^+$ ): 543.9806, found: 543.9810.

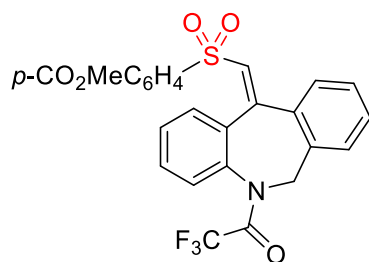

Methyl-(Z)-4-(((5-(2,2,2-trifluoroacetyl)-5,6-dihydro-11H-dibenzo[*b,e*]azepin-11-ylidene)methyl)sulfonyl)benzoate (**3g**)

$^1\text{H}$  NMR (400 MHz,  $\text{CDCl}_3$ )  $\delta$  8.19 (d,  $J = 8.3$  Hz, 2H), 7.96 (d,  $J = 8.3$  Hz, 2H), 7.71 – 7.66 (m, 1H), 7.57 – 7.47 (m, 2H), 7.43 – 7.33 (m, 3H), 7.29 (d,  $J = 7.6$  Hz, 1H), 7.15 (d,  $J = 7.6$  Hz, 1H), 6.72 (s, 1H), 5.95 (d,  $J = 16.0$  Hz, 1H), 4.35 (d,  $J = 16.1$  Hz, 1H), 3.95 (s, 3H);  $^{13}\text{C}$  NMR (100 MHz,  $\text{CDCl}_3$ )  $\delta$  165.5 (q,  $J = 36.4$  Hz), 150.9, 144.8, 135.5, 134.8, 134.5, 134.3, 134.1, 130.8, 130.7, 130.6, 130.5, 129.5, 128.9, 128.3, 128.0, 127.7, 126.3, 116.1 (q,  $J = 288.3$  Hz), 52.7, 50.9, 29.7;  $^{19}\text{F}$  NMR (376 MHz,  $\text{CDCl}_3$ )  $\delta$  -67.0; IR (KBr,  $\text{cm}^{-1}$ ): 3030, 1750, 1696, 1318, 1201, 1181; HRMS (ESI) calcd for  $\text{C}_{25}\text{H}_{18}\text{NO}_5\text{F}_3\text{NaS}^+$  ( $\text{M}+\text{Na}^+$ ): 524.0755, found: 524.0758.

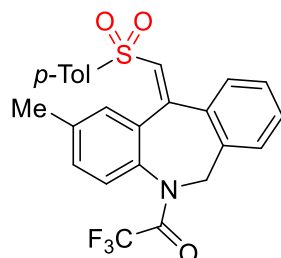

(Z)-2,2,2-Trifluoro-1-(2-methyl-11-(tosylmethylene)-6,11-dihydro-5H-dibenzo[*b,e*]azepin-5-yl)ethan-1-one (**3h**)

$^1\text{H}$  NMR (400 MHz,  $\text{CDCl}_3$ )  $\delta$  7.76 (d,  $J = 8.2$  Hz, 2H), 7.45 (s, 1H), 7.38 (d,  $J = 7.7$  Hz, 1H), 7.35 – 7.29 (m, 3H), 7.27 (s, 1H), 7.23 (d,  $J = 8.2$  Hz, 2H), 7.12 (d,  $J = 7.6$  Hz, 1H), 6.70 (s, 1H), 5.93 (d,  $J = 16.4$  Hz, 1H), 4.31 (d,  $J = 16.0$  Hz, 1H), 2.42 (d,  $J = 2.6$  Hz, 6H);  $^{13}\text{C}$  NMR (100 MHz,  $\text{CDCl}_3$ )  $\delta$  157.0 (q,  $J = 36.6$  Hz), 149.4, 144.7, 139.1, 138.3, 134.5, 134.5, 134.2, 132.9, 131.6, 131.2, 131.1, 130.2, 130.0, 129.5, 128.3, 127.9, 127.7, 126.0, 116.2 (q,  $J = 288.4$  Hz), 50.8, 21.6, 21.2;  $^{19}\text{F}$  NMR (376 MHz,  $\text{CDCl}_3$ )  $\delta$  -67.0; IR (KBr,  $\text{cm}^{-1}$ ): 3031, 2918, 1696, 1496, 1319, 1213, 1147; HRMS (ESI) calcd for  $\text{C}_{25}\text{H}_{20}\text{NO}_3\text{F}_3\text{NaS}^+$  ( $\text{M}+\text{Na}^+$ ): 494.1014, found: 494.1021.

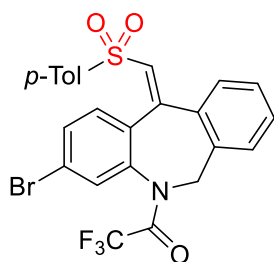

(Z)-1-(3-Bromo-11-(tosylmethylene)-6,11-dihydro-5H-dibenzo[b,e]azepin-5-yl)-2,2,2-trifluoroethan-1-one (**3i**)

$^1\text{H}$  NMR (400 MHz,  $\text{CDCl}_3$ )  $\delta$  7.76 (d,  $J = 8.0$  Hz, 2H), 7.62 – 7.54 (m, 3H), 7.39 – 7.31 (m, 4H), 7.28 (s, 1H), 7.13 (d,  $J = 7.5$  Hz, 1H), 6.73 (s, 1H), 5.92 (d,  $J = 15.1$  Hz, 1H), 4.33 (d,  $J = 14.8$  Hz, 1H), 2.42 (s, 3H);  $^{13}\text{C}$  NMR (100 MHz,  $\text{CDCl}_3$ )  $\delta$  156.7 (q,  $J = 36.8$  Hz), 147.8, 145.0, 137.8, 136.5, 133.9, 133.8, 132.2, 132.1, 132.1, 130.4, 130.1, 129.6, 129.5, 128.3, 128.1, 127.7, 123.5, 116.0 (q,  $J = 288.5$  Hz), 50.6, 21.6;  $^{19}\text{F}$  NMR (376 MHz,  $\text{CDCl}_3$ )  $\delta$  -67.0; IR (KBr,  $\text{cm}^{-1}$ ): 3081, 3029, 1702, 1319, 1205, 1149; HRMS (ESI) calcd for  $\text{C}_{24}\text{H}_{17}\text{NO}_3\text{F}_3\text{NaSBr}^+$  ( $\text{M}+\text{Na}^+$ ): 557.9962, found: 557.9962.

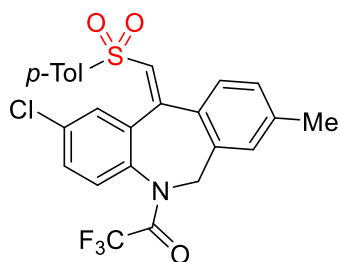

(Z)-1-(2-Chloro-8-methyl-11-(tosylmethylene)-6,11-dihydro-5H-dibenzo[b,e]azepin-5-yl)-2,2,2-trifluoroethan-1-one (**3j**)

$^1\text{H}$  NMR (400 MHz,  $\text{CDCl}_3$ )  $\delta$  7.78 (d,  $J = 8.1$  Hz, 2H), 7.60 (d,  $J = 2.0$  Hz, 1H), 7.44 (dd,  $J = 8.5, 2.3$  Hz, 1H), 7.35 (d,  $J = 8.0$  Hz, 2H), 7.29 (d,  $J = 8.5$  Hz, 1H), 7.16 (d,  $J = 5.8$  Hz, 2H), 7.01 (d,  $J = 8.3$  Hz, 1H), 6.73 (s, 1H), 5.88 (d,  $J = 15.8$  Hz, 1H), 4.26 (d,  $J = 15.6$  Hz, 1H), 2.43 (s, 3H), 2.33 (s, 3H);  $^{13}\text{C}$  NMR (100 MHz,  $\text{CDCl}_3$ )  $\delta$  156.8 (q,  $J = 37.0$  Hz), 147.8, 144.9, 138.0, 137.9, 136.4, 134.8, 134.0, 133.5, 132.0, 131.3, 130.8, 130.6, 130.4, 130.1, 129.9, 128.2, 127.7, 127.6, 116.0 (q,  $J = 288.0$  Hz), 50.4, 21.6, 20.8;  $^{19}\text{F}$  NMR (376 MHz,  $\text{CDCl}_3$ )  $\delta$  -67.0; IR (KBr,  $\text{cm}^{-1}$ ): 3023, 2923, 1699, 1480, 1222, 1144; HRMS (ESI) calcd for  $\text{C}_{25}\text{H}_{19}\text{NO}_3\text{F}_3\text{NaSCl}^+$  ( $\text{M}+\text{Na}^+$ ): 528.0624, found: 528.0627.

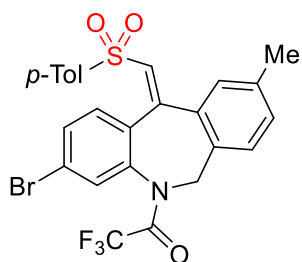

(Z)-1-(3-Bromo-9-methyl-11-(tosylmethylene)-6,11-dihydro-5H-dibenzo[*b,e*]azepin-5-yl)-2,2,2-trifluoroethan-1-one (**3k**)

$^1\text{H}$  NMR (400 MHz,  $\text{CDCl}_3$ )  $\delta$  7.76 (d,  $J = 8.0$  Hz, 2H), 7.65 – 7.51 (m, 3H), 7.33 (d,  $J = 8.0$  Hz, 2H), 7.20 – 7.13 (m, 2H), 7.01 (d,  $J = 7.8$  Hz, 1H), 6.72 (s, 1H), 5.87 (d,  $J = 14.6$  Hz, 1H), 4.29 (d,  $J = 15.0$  Hz, 1H), 2.42 (s, 3H), 2.32 (s, 3H);  $^{13}\text{C}$  NMR (100 MHz,  $\text{CDCl}_3$ )  $\delta$  156.6 (q,  $J = 37.0$  Hz), 148.1, 144.9, 138.0, 137.8, 136.5, 133.9, 133.6, 132.1, 132.0, 131.9, 131.3, 130.8, 130.1, 130.0, 129.5, 128.2, 127.7, 123.4, 116.0 (q,  $J = 286.1$  Hz), 50.4, 21.6, 20.8;  $^{19}\text{F}$  NMR (376 MHz,  $\text{CDCl}_3$ )  $\delta$  -67.0; IR (KBr,  $\text{cm}^{-1}$ ): 3037, 2923, 1713, 1316, 1152, 1093; HRMS (ESI) calcd for  $\text{C}_{25}\text{H}_{19}\text{NO}_3\text{F}_3\text{NaSBr}^+$  ( $\text{M}+\text{Na}^+$ ): 572.0119, found: 572.0124.

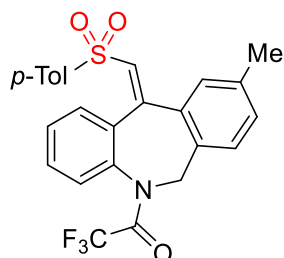

(Z)-2,2,2-Trifluoro-1-(9-methyl-11-(tosylmethylene)-6,11-dihydro-5H-dibenzo[*b,e*]azepin-5-yl)ethan-1-one (**3l**)

$^1\text{H}$  NMR (400 MHz,  $\text{CDCl}_3$ )  $\delta$  7.77 (d,  $J = 8.2$  Hz, 2H), 7.72 – 7.65 (m, 1H), 7.52 – 7.44 (m, 2H), 7.38 – 7.30 (m, 3H), 7.20 (s, 1H), 7.14 (d,  $J = 7.8$  Hz, 1H), 7.01 (d,  $J = 7.9$  Hz, 1H), 6.71 (s, 1H), 5.90 (d,  $J = 16.4$  Hz, 1H), 4.29 (d,  $J = 16.1$  Hz, 1H), 2.41 (s, 3H), 2.32 (s, 3H);  $^{13}\text{C}$  NMR (100 MHz,  $\text{CDCl}_3$ )  $\delta$  156.8 (q,  $J = 36.7$  Hz), 149.3, 144.7, 138.1, 137.8, 135.5, 134.8, 134.1, 131.5, 131.1, 130.8, 130.5, 130.0, 130.0, 128.8, 128.2, 127.7, 126.3, 116.2 (q,  $J = 288.4$  Hz), 50.5, 21.6, 20.8;  $^{19}\text{F}$  NMR (376 MHz,  $\text{CDCl}_3$ )  $\delta$  -67.0; IR (KBr,  $\text{cm}^{-1}$ ): 3040, 2926, 1699, 1316, 1144, 1083; HRMS (ESI) calcd for  $\text{C}_{25}\text{H}_{20}\text{NO}_3\text{F}_3\text{NaS}^+$  ( $\text{M}+\text{Na}^+$ ): 494.1014, found: 494.1017.



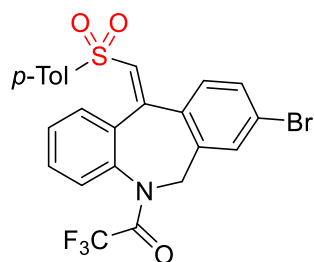

(Z)-1-(8-Bromo-11-(tosylmethylene)-6,11-dihydro-5H-dibenzo[b,e]azepin-5-yl)-2,2,2-trifluoroethan-1-one (**3m**)

$^1\text{H}$  NMR (400 MHz,  $\text{CDCl}_3$ )  $\delta$  7.75 (d,  $J$  = 8.2 Hz, 2H), 7.71 – 7.66 (m, 1H), 7.54 – 7.48 (m, 2H), 7.42 – 7.34 (m, 3H), 7.32 – 7.27 (m, 3H), 6.69 (s, 1H), 5.89 (d,  $J$  = 16.5 Hz, 1H), 4.29 (d,  $J$  = 19.2 Hz, 1H), 2.42 (s, 3H);  $^{13}\text{C}$  NMR (100 MHz,  $\text{CDCl}_3$ )  $\delta$  156.9 (q,  $J$  = 37.0 Hz), 147.7, 144.9, 137.8, 136.2, 135.4, 134.2, 133.3, 132.3, 131.1, 131.0, 130.9, 130.8, 130.1, 129.0, 127.7, 126.3, 124.3, 116.0 (q,  $J$  = 288.5 Hz), 50.3, 21.6;  $^{19}\text{F}$  NMR (376 MHz,  $\text{CDCl}_3$ )  $\delta$  -67.1; IR (KBr,  $\text{cm}^{-1}$ ): 3039, 2923, 1702, 1319, 1152, 1088; HRMS (ESI) calcd for  $\text{C}_{24}\text{H}_{17}\text{NO}_3\text{F}_3\text{NaSBr}^+$  ( $\text{M}+\text{Na}^+$ ): 557.9962, found: 557.9968.

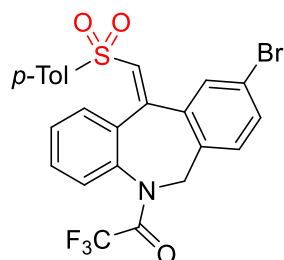

(Z)-1-(9-Bromo-11-(tosylmethylene)-6,11-dihydro-5H-dibenzo[b,e]azepin-5-yl)-2,2,2-trifluoroethan-1-one (**3n**)

$^1\text{H}$  NMR (400 MHz,  $\text{CDCl}_3$ )  $\delta$  7.77 (d,  $J$  = 8.2 Hz, 2H), 7.72 – 7.66 (m, 1H), 7.56 – 7.49 (m, 3H), 7.44 (dd,  $J$  = 8.3, 1.9 Hz, 1H), 7.35 (t,  $J$  = 8.5 Hz, 3H), 7.01 (d,  $J$  = 8.3 Hz, 1H), 6.71 (s, 1H), 5.88 (d,  $J$  = 16.5 Hz, 1H), 4.25 (d,  $J$  = 16.7 Hz, 1H), 2.43 (s, 3H);  $^{13}\text{C}$  NMR (100 MHz,  $\text{CDCl}_3$ )  $\delta$  156.9 (q,  $J$  = 36.9 Hz), 147.3, 145.0, 137.7, 136.0, 135.4, 134.1, 133.2, 133.0, 132.8, 132.0, 130.9, 130.8, 130.1, 129.9, 129.0, 127.8, 126.3, 121.3, 116.1 (q,  $J$  = 288.4 Hz), 50.3, 21.6;  $^{19}\text{F}$  NMR (376 MHz,  $\text{CDCl}_3$ )  $\delta$  -67.0; IR (KBr,  $\text{cm}^{-1}$ ): 3031, 2923, 1707, 1324, 1155, 1083; HRMS (ESI) calcd for  $\text{C}_{24}\text{H}_{17}\text{NO}_3\text{F}_3\text{NaSBr}^+$  ( $\text{M}+\text{Na}^+$ ): 557.9962, found: 557.9971.

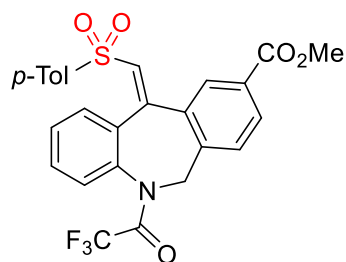

Methyl-(*Z*)-11-(tosylmethylene)-5-(2,2,2-trifluoroacetyl)-6,11-dihydro-5*H*-dibenzo[*b,e*]azepine-9-carboxylate (**3o**)

$^1\text{H}$  NMR (400 MHz,  $\text{CDCl}_3$ )  $\delta$  8.08 (d,  $J = 1.2$  Hz, 1H), 7.96 (dd,  $J = 8.1, 1.5$  Hz, 1H), 7.78 (d,  $J = 8.2$  Hz, 2H), 7.71 (dd,  $J = 6.9, 2.1$  Hz, 1H), 7.58 – 7.46 (m, 2H), 7.38 (d,  $J = 7.0$  Hz, 1H), 7.34 (d,  $J = 8.1$  Hz, 2H), 7.22 (d,  $J = 8.1$  Hz, 1H), 6.79 (s, 1H), 6.00 (d,  $J = 17.5$  Hz, 1H), 4.37 (d,  $J = 17.3$  Hz, 1H), 3.94 (s, 3H), 2.42 (s, 3H);  $^{13}\text{C}$  NMR (100 MHz,  $\text{CDCl}_3$ )  $\delta$  165.9, 157.0 (q,  $J = 36.9$  Hz), 147.8, 145.0, 139.2, 137.7, 135.4, 134.6, 134.4, 132.8, 130.9, 130.8, 130.7, 130.1, 129.9, 129.1, 128.6, 127.8, 126.3, 116.1 (q,  $J = 288.5$  Hz), 52.5, 50.7, 21.6;  $^{19}\text{F}$  NMR (376 MHz,  $\text{CDCl}_3$ )  $\delta$  -70.0; IR (KBr,  $\text{cm}^{-1}$ ): 3037, 2959, 1707, 1319, 1152; HRMS (ESI) calcd for  $\text{C}_{26}\text{H}_{20}\text{NO}_5\text{F}_3\text{Na}^+$  ( $\text{M}+\text{Na}^+$ ): 538.0912, found: 538.0910.

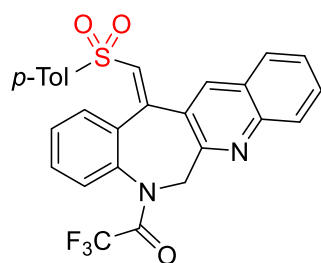

(*Z*)-2,2,2-Trifluoro-1-(13-(tosylmethylene)-7,13-dihydro-8*H*-benzo[6,7]azepino[3,4-*c*]quinolin-8-yl)ethan-1-one (**3p**)

$^1\text{H}$  NMR (400 MHz,  $\text{CDCl}_3$ )  $\delta$  8.24 (s, 1H), 7.96 (d,  $J = 8.4$  Hz, 1H), 7.84 (d,  $J = 8.0$  Hz, 1H), 7.82 – 7.77 (m, 2H), 7.76 – 7.66 (m, 2H), 7.60 – 7.50 (m, 3H), 7.46 (d,  $J = 7.4$  Hz, 1H), 7.34 (d,  $J = 8.1$  Hz, 2H), 6.86 (s, 1H), 6.24 (d,  $J = 17.9$  Hz, 1H), 4.55 (d,  $J = 17.9$  Hz, 1H), 2.42 (s, 3H);  $^{13}\text{C}$  NMR (100 MHz,  $\text{CDCl}_3$ )  $\delta$  157.2 (q,  $J = 37.4$  Hz), 153.3, 147.8, 146.7, 145.1, 137.6, 137.3, 135.7, 134.0, 132.5, 131.4, 131.1, 131.0, 130.1, 129.9, 129.2, 128.3, 127.9, 127.8, 127.5, 126.7, 126.6, 116.2 (q,  $J = 281.0$  Hz), 54.1, 21.6;  $^{19}\text{F}$  NMR

(376 MHz, CDCl<sub>3</sub>)  $\delta$  -67.1; IR (KBr, cm<sup>-1</sup>): 3062, 2923, 1699, 1485, 1324, 1147, 1083; HRMS (ESI) calcd for C<sub>27</sub>H<sub>19</sub>N<sub>2</sub>O<sub>3</sub>F<sub>3</sub>NaS<sup>+</sup> (M+Na<sup>+</sup>): 531.0966, found: 531.0967.

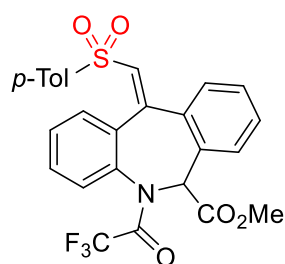

Methyl-(Z)-11-(tosylmethylene)-5-(2,2,2-trifluoroacetyl)-6,11-dihydro-5H-dibenzo[*b,e*]azepine-6-carboxylate (**3q**)

<sup>1</sup>H NMR (400 MHz, CDCl<sub>3</sub>)  $\delta$  7.75 (d, *J* = 8.2 Hz, 2H), 7.72 – 7.67 (m, 1H), 7.52 – 7.43 (m, 3H), 7.40 – 7.29 (m, 5H), 7.20 (d, *J* = 7.4 Hz, 1H), 6.81 (s, 1H), 6.70 (s, 1H), 3.66 (s, 3H), 2.41 (s, 3H); <sup>13</sup>C NMR (100 MHz, CDCl<sub>3</sub>)  $\delta$  168.2, 157.4 (q, *J* = 36.9 Hz), 148.5, 144.8, 138.0, 134.7, 134.3, 132.5, 131.3, 131.0, 130.0, 130.0, 129.8, 129.4, 129.0, 127.8, 127.7, 116.1 (q, *J* = 288.3 Hz), 60.8, 53.1, 21.6; <sup>19</sup>F NMR (376 MHz, CDCl<sub>3</sub>)  $\delta$  -66.5; IR (KBr, cm<sup>-1</sup>): 3042, 2953, 1757, 1696, 1316, 1172; HRMS (ESI) calcd for C<sub>26</sub>H<sub>20</sub>NO<sub>5</sub>F<sub>3</sub>NaS<sup>+</sup> (M+Na<sup>+</sup>): 538.0912, found: 538.0909.

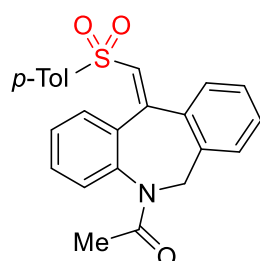

(Z)-1-(11-(Tosylmethylene)-6,11-dihydro-5H-dibenzo[*b,e*]azepin-5-yl)ethan-1-one (**3r**)

<sup>1</sup>H NMR (400 MHz, CDCl<sub>3</sub>)  $\delta$  7.74 (d, *J* = 8.0 Hz, 2H), 7.60 (d, *J* = 7.4 Hz, 1H), 7.52 – 7.41 (m, 2H), 7.36 – 7.27 (m, 5H), 7.20 (t, *J* = 7.5 Hz, 1H), 7.13 (d, *J* = 7.6 Hz, 1H), 6.72 (s, 1H), 6.07 (d, *J* = 15.9 Hz, 1H), 4.16 (d, *J* = 16.5 Hz, 1H), 2.43 (s, 3H), 2.08 (s, 3H); <sup>13</sup>C NMR (100 MHz, CDCl<sub>3</sub>)  $\delta$  170.9, 152.1, 144.7, 138.5, 138.5, 136.3, 136.2, 134.7, 131.5, 130.7, 130.0, 129.9, 129.8, 128.8, 128.3, 128.3, 127.6, 127.2, 126.9, 48.1, 22.1, 21.6; IR (KBr, cm<sup>-1</sup>): 3017, 1657, 1305, 1144; HRMS (ESI) calcd for C<sub>24</sub>H<sub>21</sub>NO<sub>3</sub>NaS<sup>+</sup> (M+Na<sup>+</sup>): 426.1140, found: 426.1138.

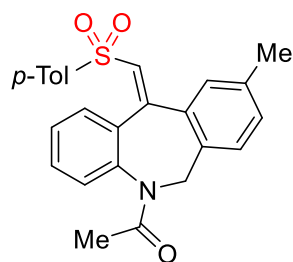

(Z)-1-(9-Methyl-11-(tosylmethylene)-6,11-dihydro-5H-dibenzo[*b,e*]azepin-5-yl)ethan-1-one (**3s**)

$^1\text{H}$  NMR (400 MHz,  $\text{CDCl}_3$ )  $\delta$  7.74 (d,  $J = 8.3$  Hz, 2H), 7.59 (dd,  $J = 7.4, 1.4$  Hz, 1H), 7.51 – 7.46 (m, 1H), 7.45 – 7.41 (m, 1H), 7.36 – 7.28 (m, 3H), 7.11 (d,  $J = 6.4$  Hz, 2H), 7.01 (d,  $J = 8.4$  Hz, 1H), 6.70 (s, 1H), 6.02 (d,  $J = 17.1$  Hz, 1H), 4.11 (d,  $J = 15.8$  Hz, 1H), 2.43 (s, 3H), 2.30 (s, 3H), 2.06 (s, 3H);  $^{13}\text{C}$  NMR (100 MHz,  $\text{CDCl}_3$ )  $\delta$  170.8, 152.3, 144.7, 138.5, 138.5, 137.0, 136.4, 134.5, 133.1, 131.1, 130.7, 130.7, 130.0, 129.8, 129.2, 128.3, 128.2, 127.6, 126.9, 47.9, 22.1, 21.6, 20.8; IR (KBr,  $\text{cm}^{-1}$ ): 3051, 2918, 1674, 1591, 1316, 1149, 1088; HRMS (ESI) calcd for  $\text{C}_{25}\text{H}_{23}\text{NO}_3\text{NaS}^+$  ( $\text{M}+\text{Na}^+$ ): 440.1296, found: 440.1290.

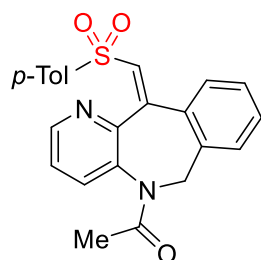

(Z)-1-(11-(Tosylmethylene)-6,11-dihydro-5H-benzo[*e*]pyrido[3,2-*b*]azepin-5-yl)ethan-1-one (**3t**)

$^1\text{H}$  NMR (400 MHz,  $\text{CDCl}_3$ )  $\delta$  8.67 (d,  $J = 4.3$  Hz, 1H), 7.98 (d,  $J = 8.1$  Hz, 2H), 7.71 (d,  $J = 7.7$  Hz, 1H), 7.48 – 7.42 (m, 1H), 7.38 (d,  $J = 8.0$  Hz, 2H), 7.34 – 7.26 (m, 2H), 7.22 – 7.12 (m, 2H), 6.74 (s, 1H), 5.12 (s, 2H), 2.45 (s, 3H), 2.17 (s, 3H);  $^{13}\text{C}$  NMR (100 MHz,  $\text{CDCl}_3$ )  $\delta$  170.7, 154.8, 152.2, 149.2, 144.6, 138.1, 135.9, 135.5, 135.0, 132.7, 132.2, 130.2, 129.9, 129.0, 128.2, 128.2, 127.5, 125.1, 47.9, 22.2, 21.7; IR (KBr,  $\text{cm}^{-1}$ ): 3031, 1671, 1310, 1147, 1088; HRMS (ESI) calcd for  $\text{C}_{23}\text{H}_{20}\text{N}_2\text{O}_3\text{NaS}^+$  ( $\text{M}+\text{Na}^+$ ): 427.1092, found: 427.1096.

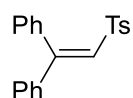

#### (2-Tosylethene-1,1-diyl)dibenzene (**4**)

<sup>1</sup>H NMR (400 MHz, CDCl<sub>3</sub>) δ 7.47 (d, *J* = 7.9 Hz, 2H), 7.38 – 7.32 (m, 2H), 7.32 – 7.26 (m, 3H), 7.25 – 7.22 (m, 1H), 7.21 – 7.16 (m, 2H), 7.12 (d, *J* = 8.0 Hz, 2H), 7.09 (d, *J* = 7.8 Hz, 2H), 6.99 (d, *J* = 0.9 Hz, 1H), 2.34 (s, 3H); <sup>13</sup>C NMR (100 MHz, CDCl<sub>3</sub>) δ 154.8, 143.9, 139.3, 138.7, 135.7, 130.4, 129.9, 129.5, 129.1, 129.0, 128.7, 128.3, 127.9, 127.8, 21.7; HRMS (ESI) calcd for C<sub>21</sub>H<sub>18</sub>O<sub>2</sub>NaS<sup>+</sup> (M+Na<sup>+</sup>): 357.0925, found: 357.0927.

#### General experimental procedure for the Suzuki coupling with **3n**

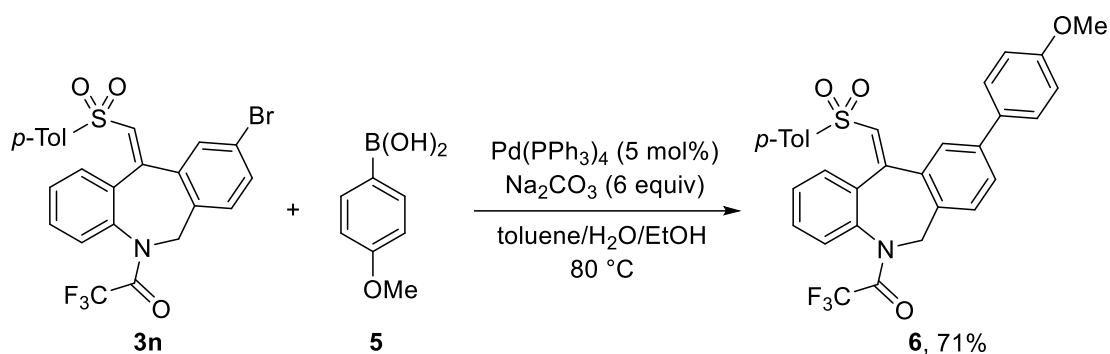

The sulfonated dibenzazepine **3n** (0.1 mmol, 1 equiv), 4-methoxyphenylboronic acid **5** (0.12 mmol, 1.2 equiv), Na<sub>2</sub>CO<sub>3</sub> (0.6 mmol, 6 equiv) and Pd(PPh<sub>3</sub>)<sub>4</sub> (0.005 mmol, 5 mol%) were suspended in a degassed solvent mixture of toluene/H<sub>2</sub>O/EtOH (5:3:1 v/v/v, 4.5 mL) in a sealed tube under N<sub>2</sub> atmosphere. The reaction mixture was stirred at 80 °C for 20 h. After completion of reaction as indicated by TLC, the reaction mixture was extracted with EtOAc (10 mL × 3). The organic phases were combined and washed with brine before dried with anhydrous Na<sub>2</sub>SO<sub>4</sub>. The solvent was then evaporated under reduced pressure and the residue was purified by preparative TLC (*n*-hexane/ethyl acetate = 3:1) to give the desired product **6** in 71% yield.

#### (*Z*)-2,2,2-trifluoro-1-(9-(4-methoxyphenyl)-11-(tosylmethylene)-6,11-dihydro-5*H*-dibenzo[*b,e*]azepin-5-yl)ethan-1-one (**6**)

<sup>1</sup>H NMR (400 MHz, CDCl<sub>3</sub>) δ 7.79 – 7.72 (m, 3H), 7.57 – 7.45 (m, 6H), 7.38 (d, *J* = 8.3 Hz, 1H), 7.31 (d, *J* = 8.1 Hz, 2H), 7.18 (d, *J* = 8.0 Hz, 1H), 6.99 (d, *J* = 8.7 Hz, 2H), 6.77 (s, 1H), 5.97 (d, *J* = 17.1 Hz, 1H), 4.36 (d, *J* = 16.9 Hz, 1H), 3.86 (s, 3H), 2.41 (s, 3H); <sup>13</sup>C NMR (100 MHz, CDCl<sub>3</sub>) δ 159.7, 156.9 (q, *J* = 36.4 Hz), 149.1, 144.8, 140.8, 137.9, 135.5, 134.6, 132.2, 131.9, 131.9, 131.0, 130.6, 130.0, 128.9, 128.8, 128.5, 128.2, 127.7,

127.6, 126.3, 116.2 (q,  $J = 288.2$  Hz), 114.4, 55.4, 50.5, 21.6; IR (KBr,  $\text{cm}^{-1}$ ): 3021, 2926, 1707, 1607, 1488, 1247, 1149; HRMS (ESI) calcd for  $\text{C}_{31}\text{H}_{24}\text{NO}_4\text{F}_3\text{NaS}^+$  ( $\text{M}+\text{Na}^+$ ): 586.1276, found: 586.1273.

#### UV/Vis Absorption Spectra

The UV/Vis absorption spectra of DMSO solutions of **1a** (0.0.25 M), DABSO (0.0.25 M), and **2a** (0.0.25 M) are shown in Figure S1.

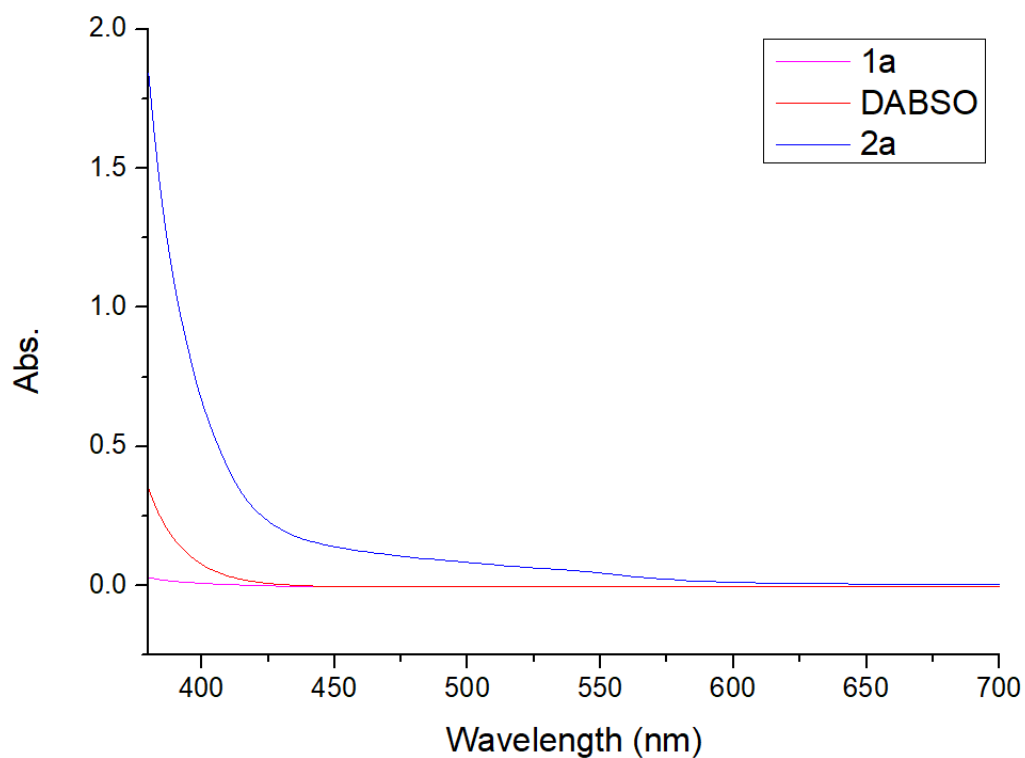

**Figure S1.** UV/Vis absorption spectra for **1a**, DABSO and **2a** in DMSO.

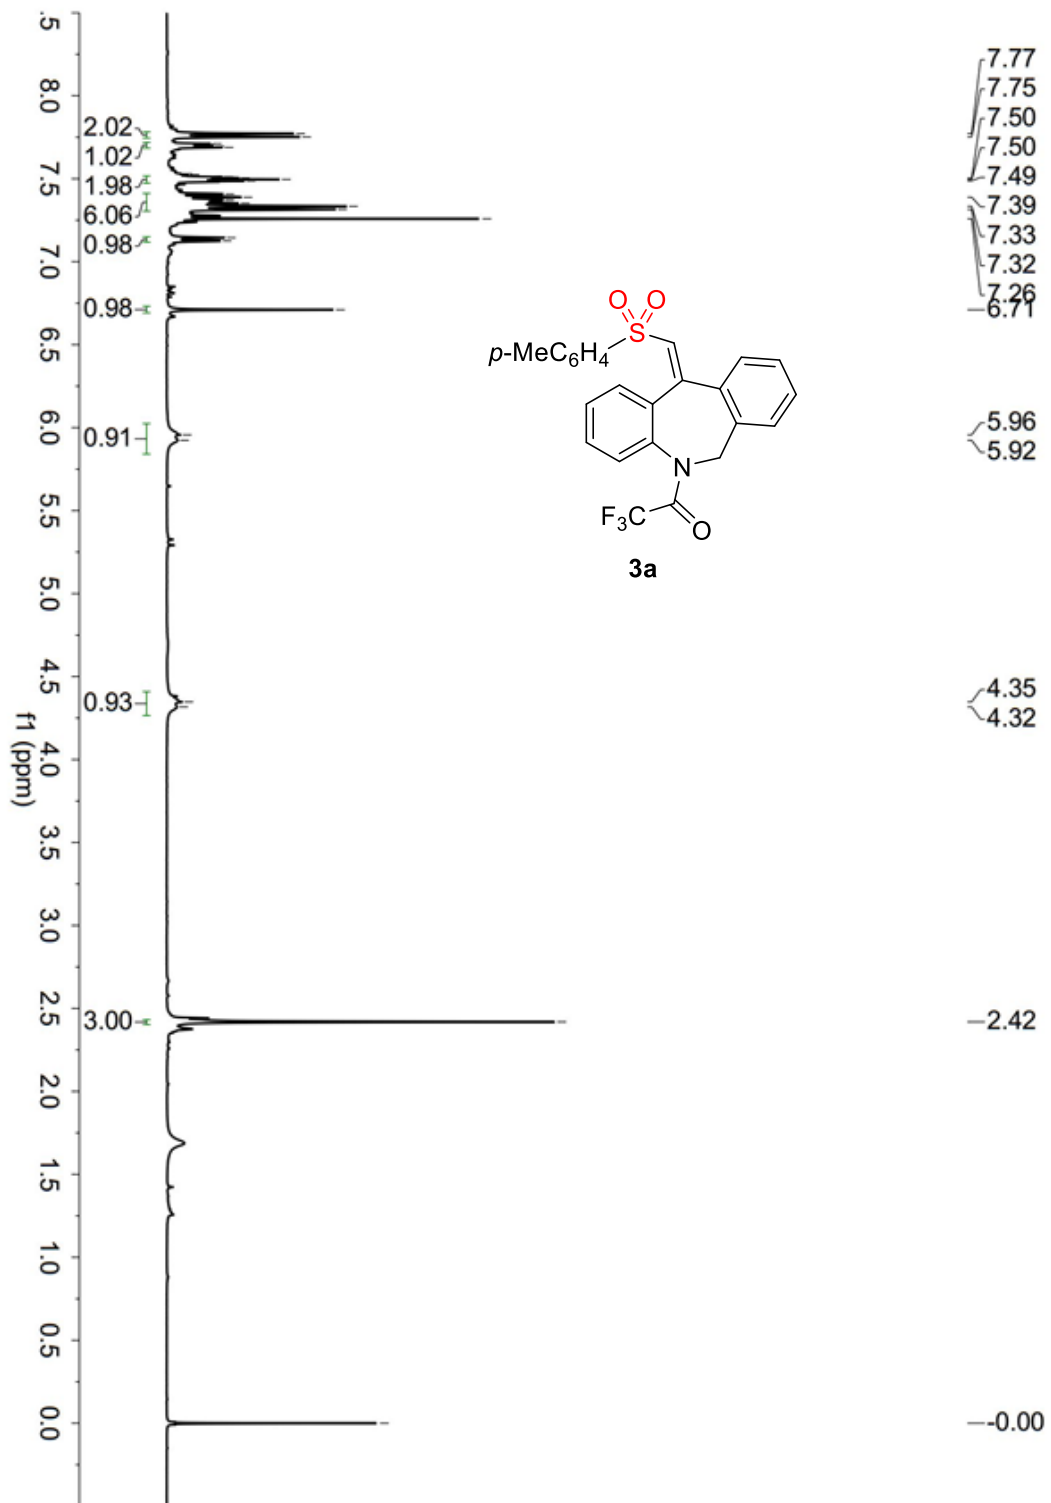

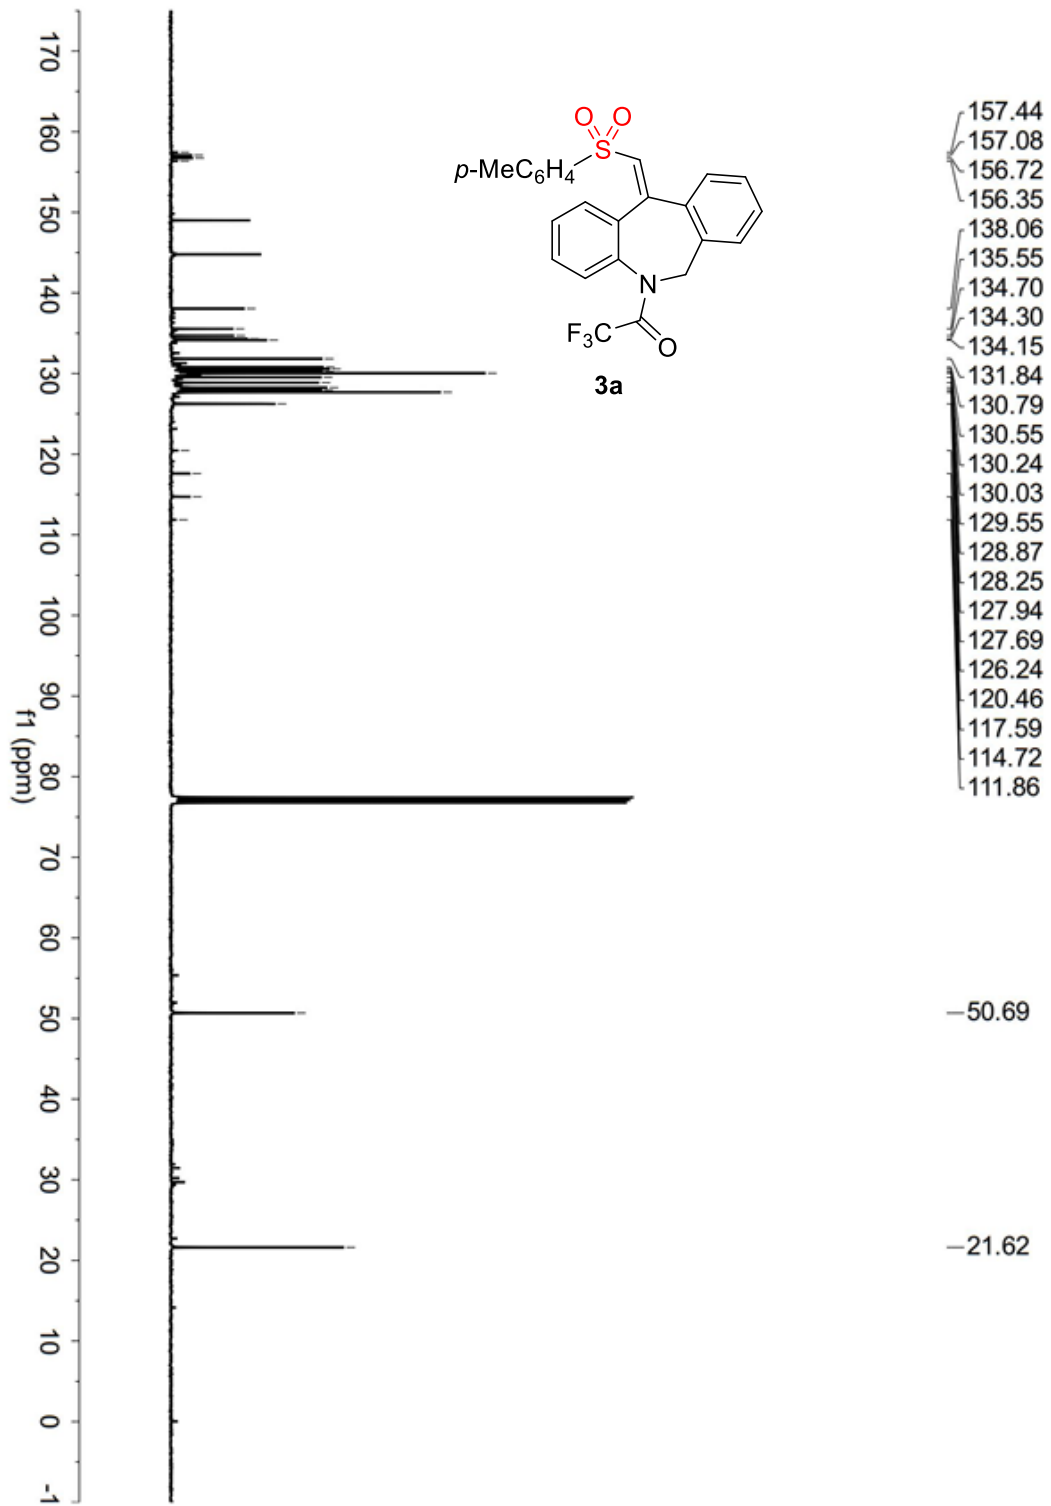



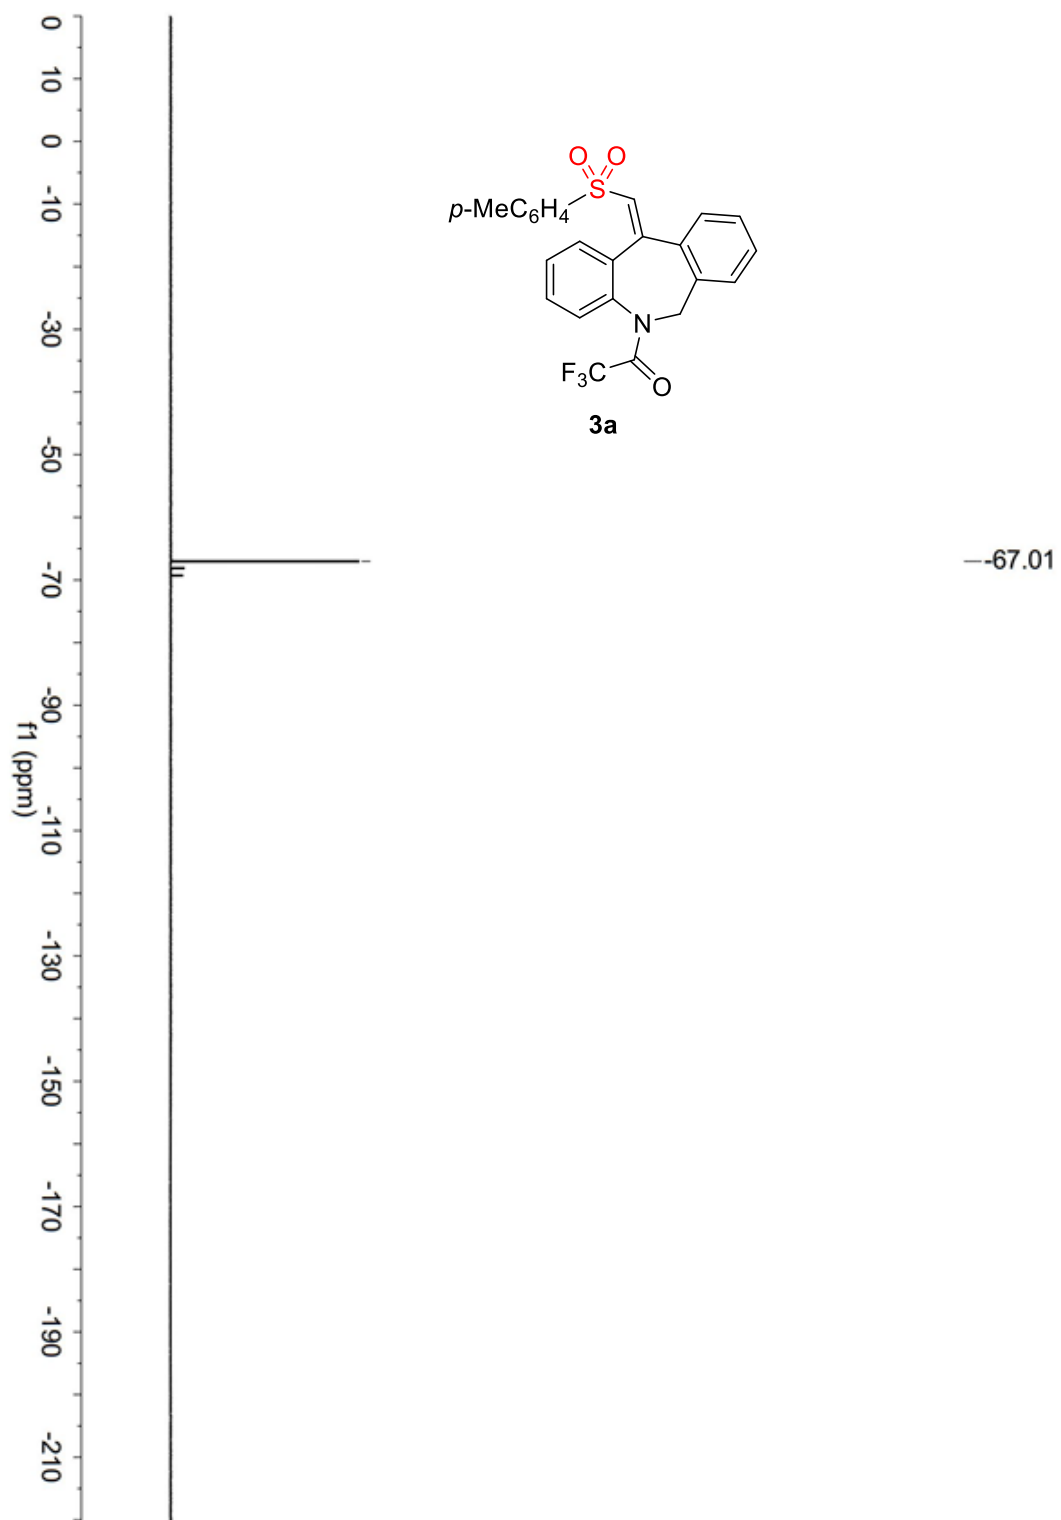

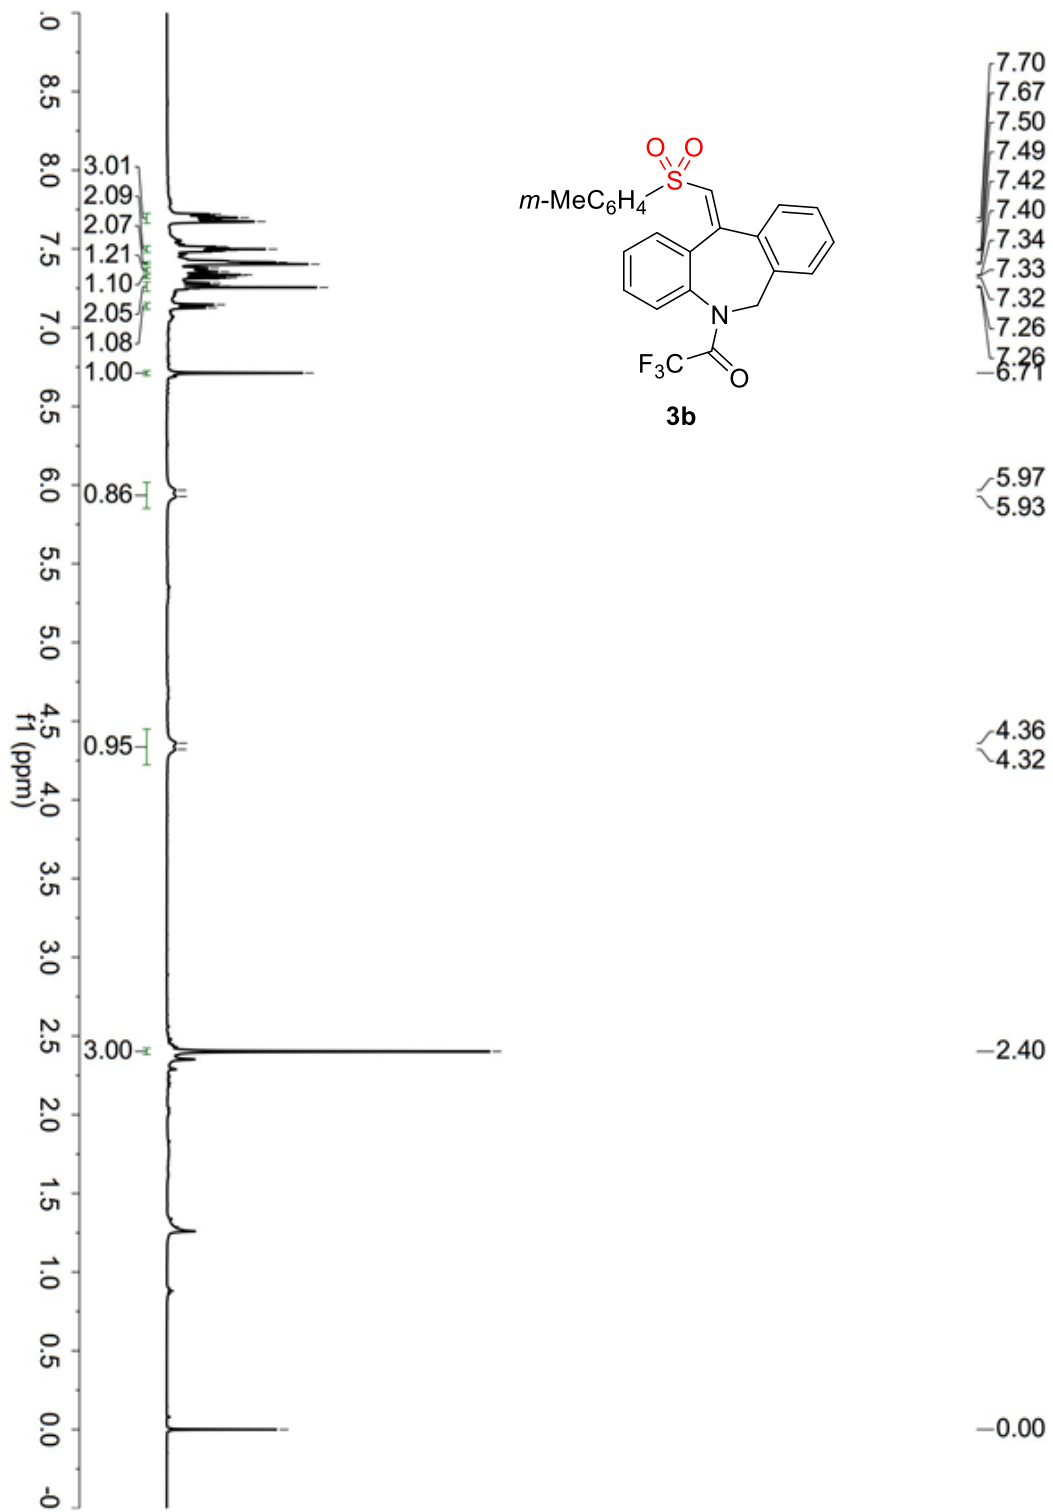

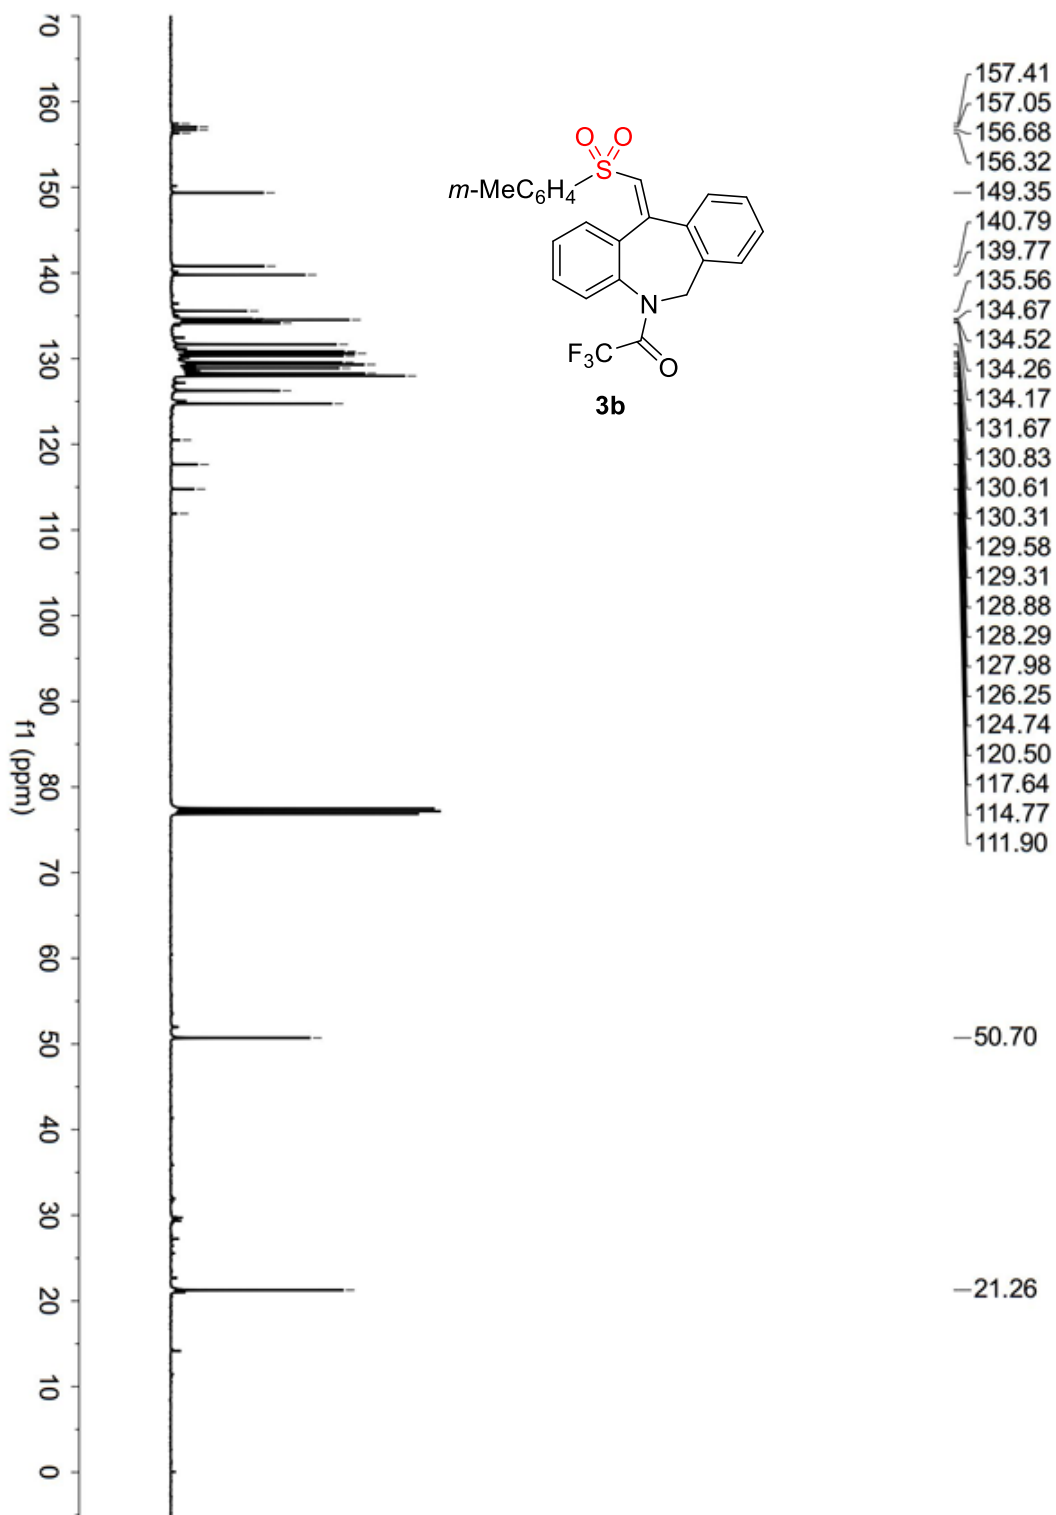

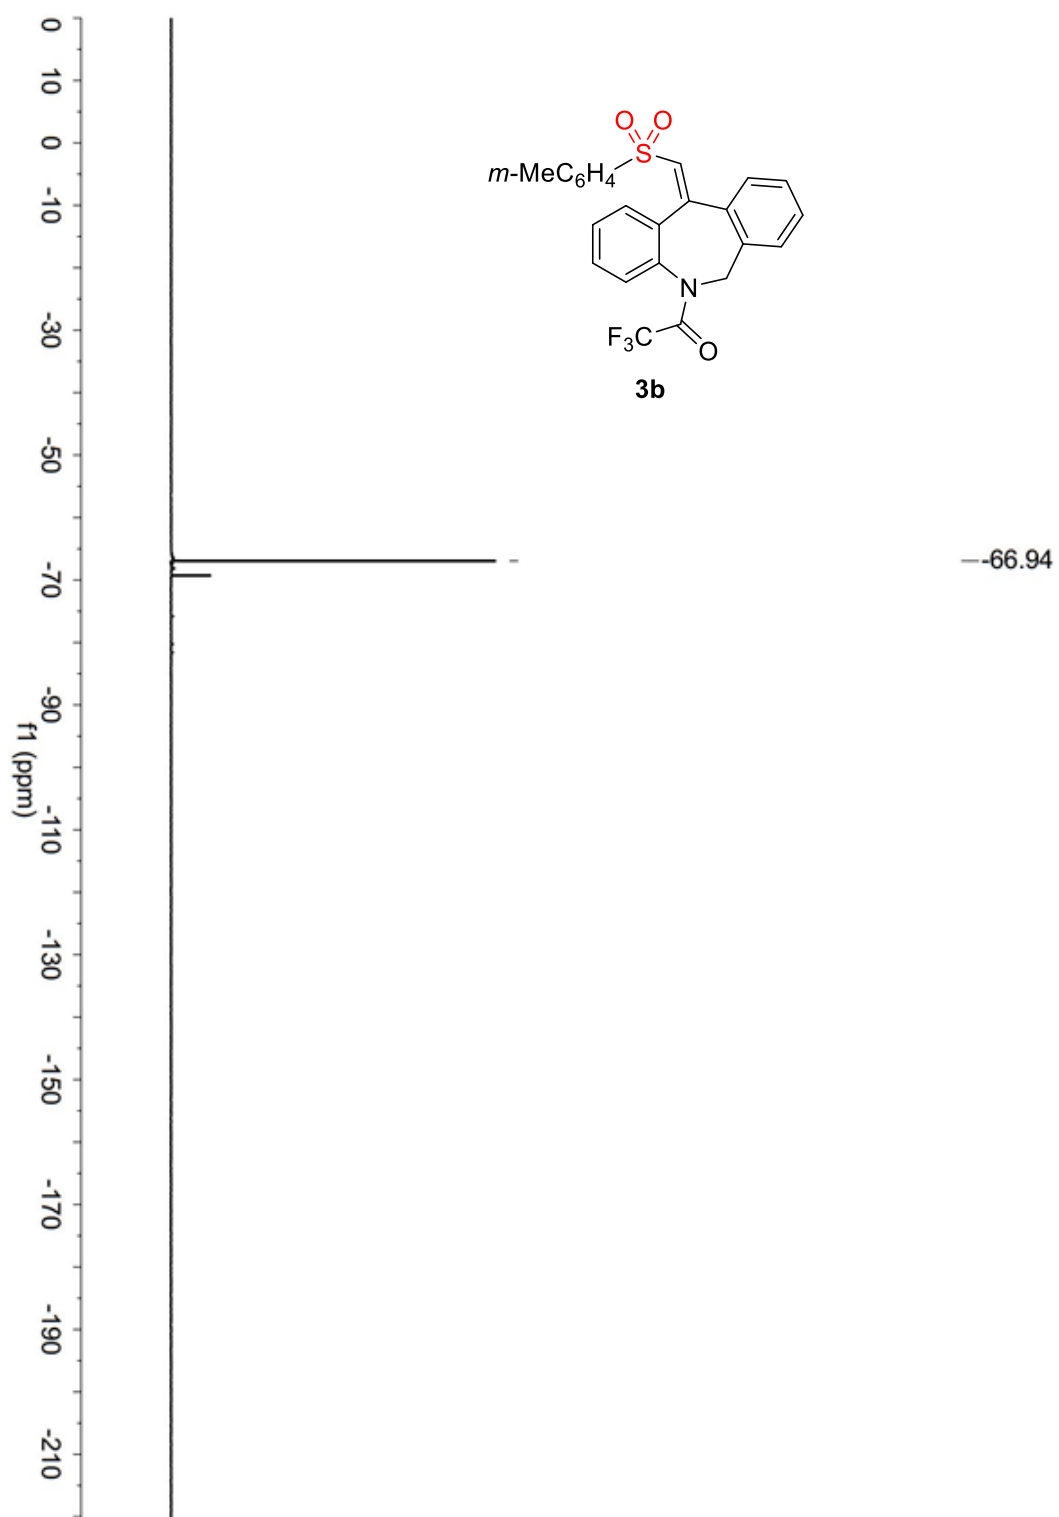

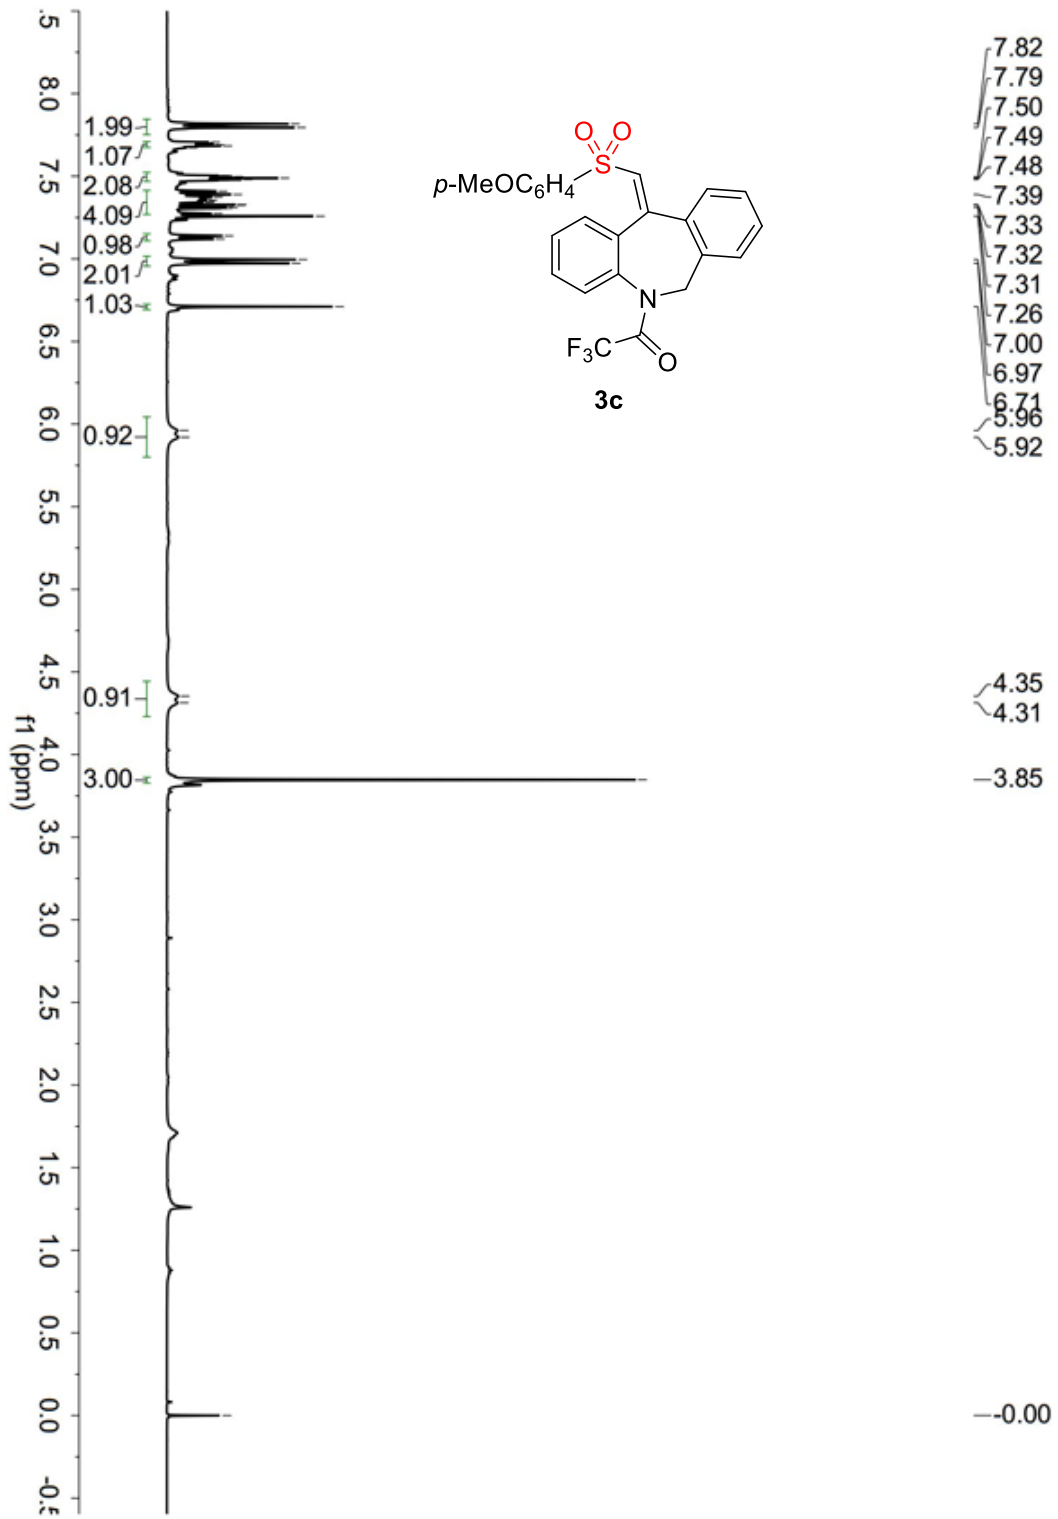

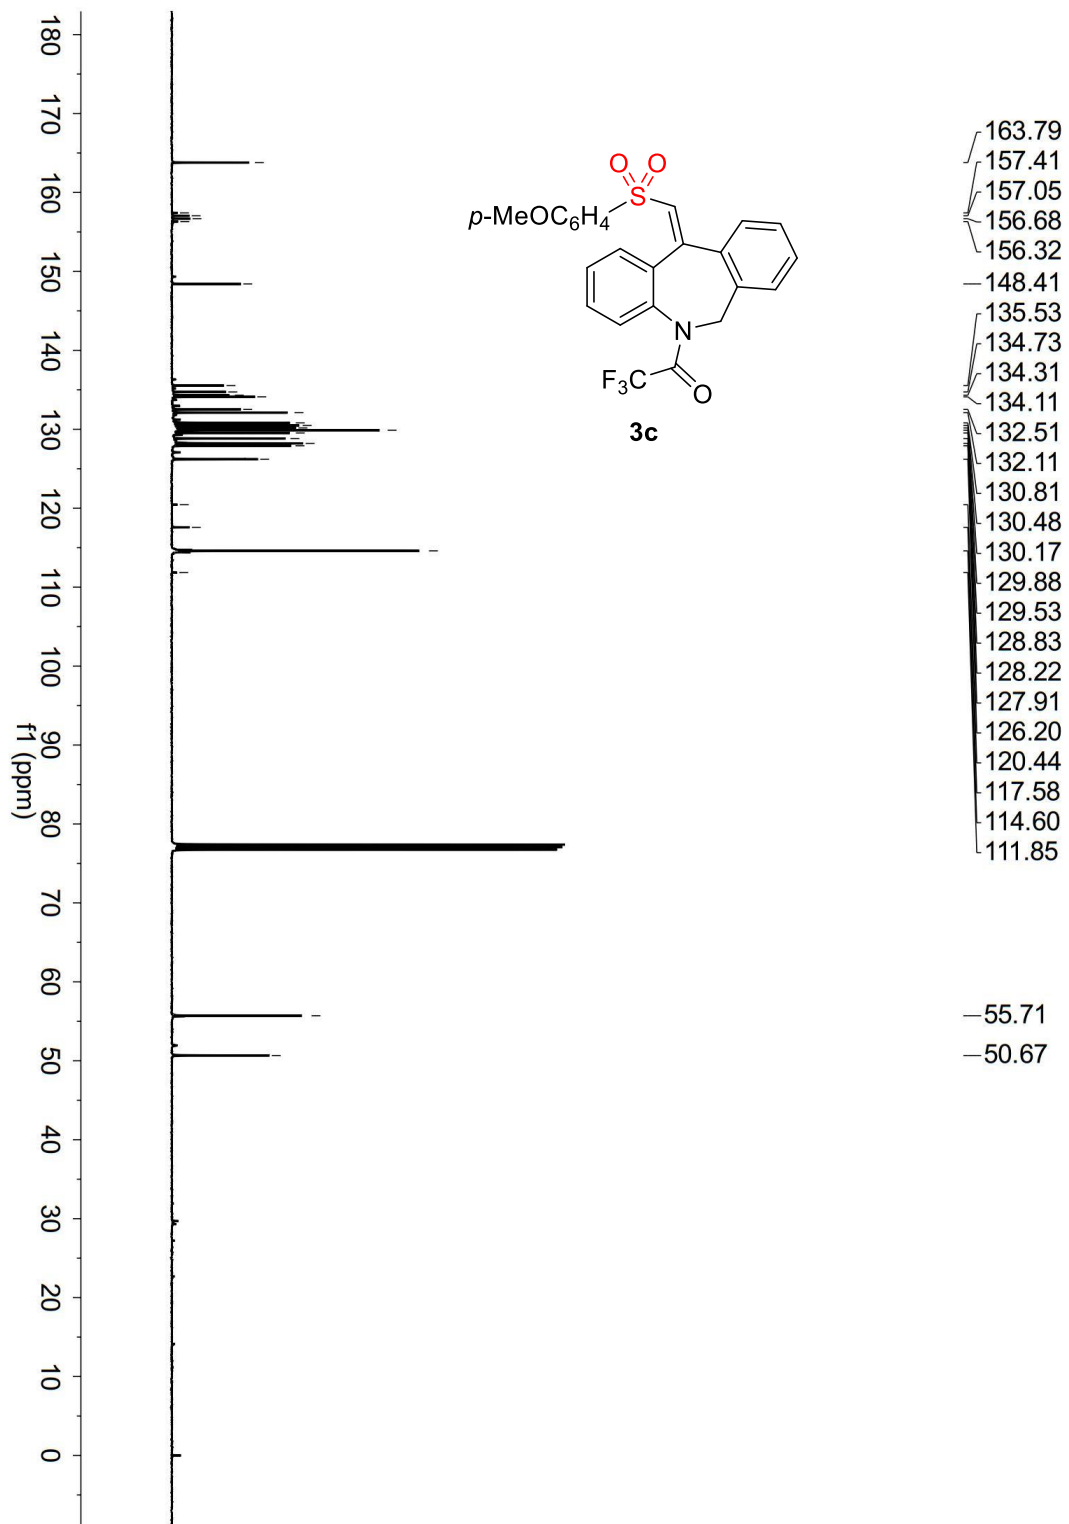

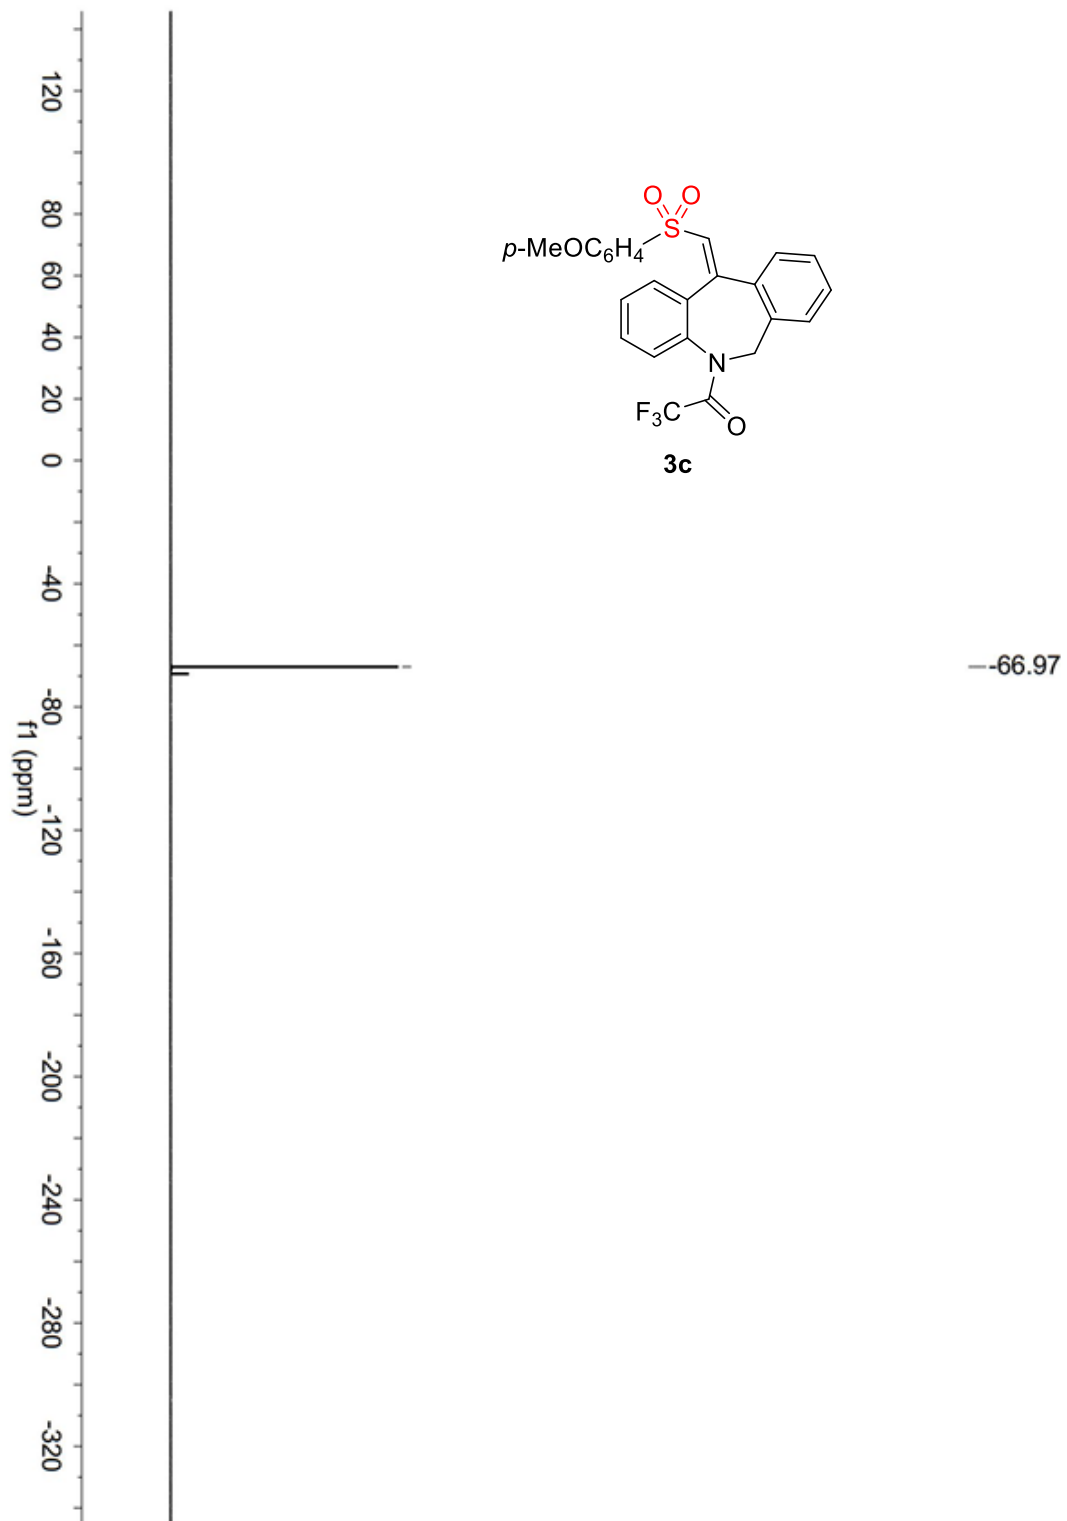

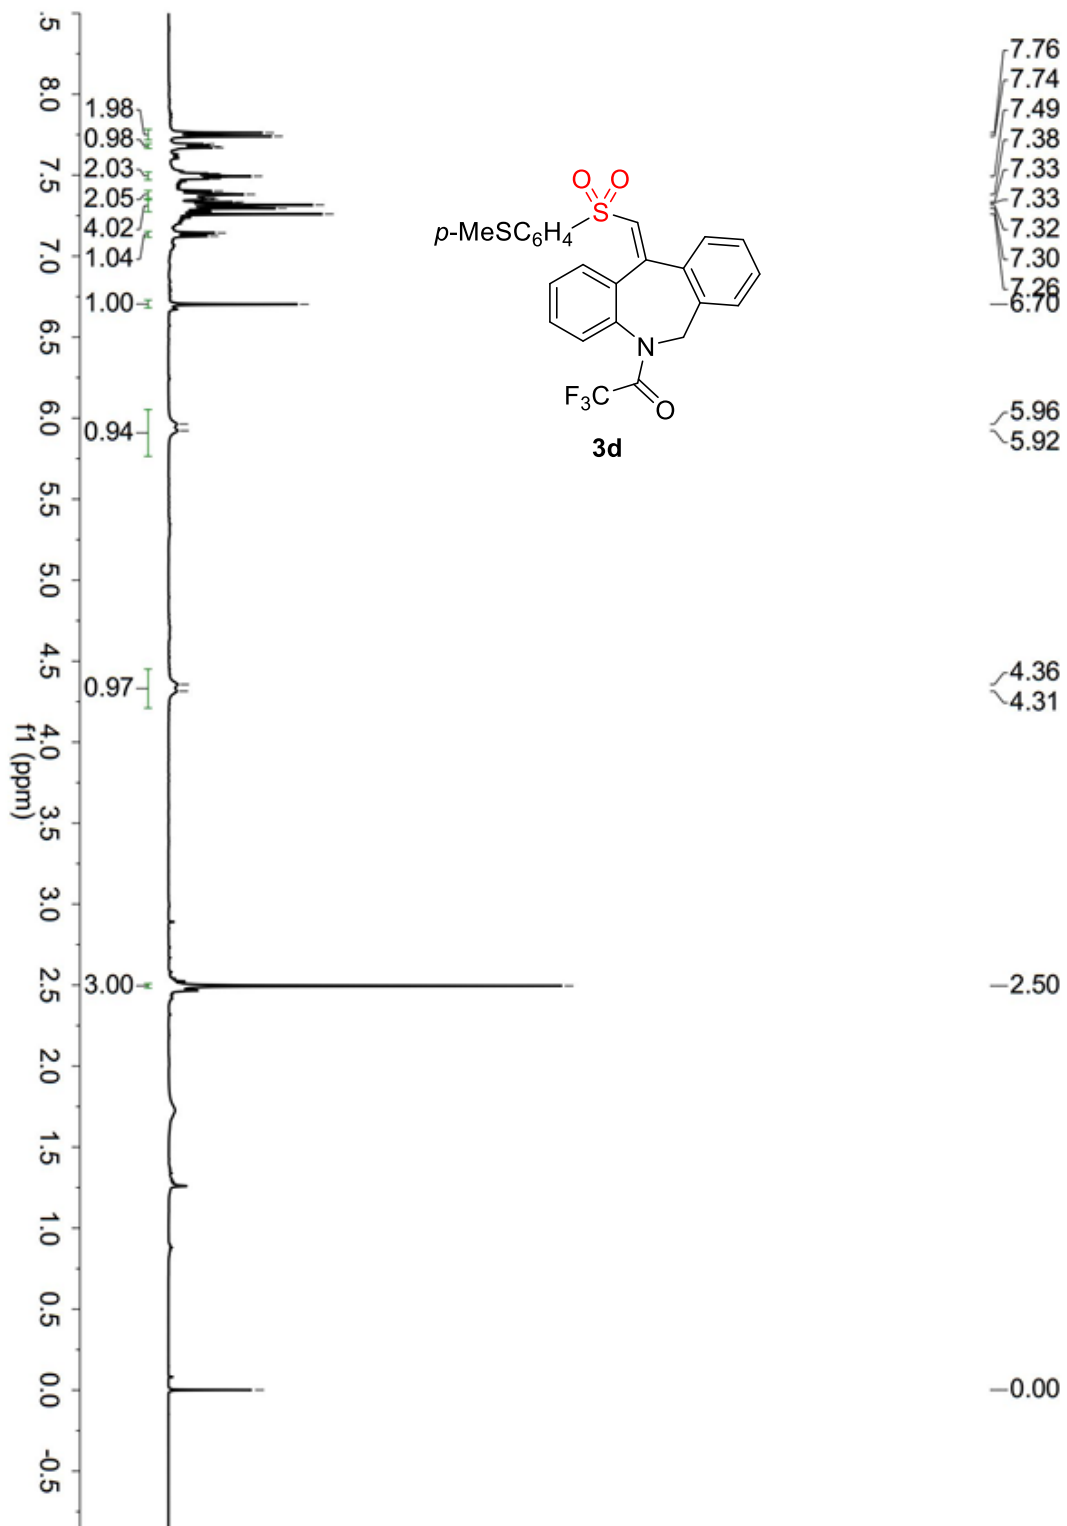



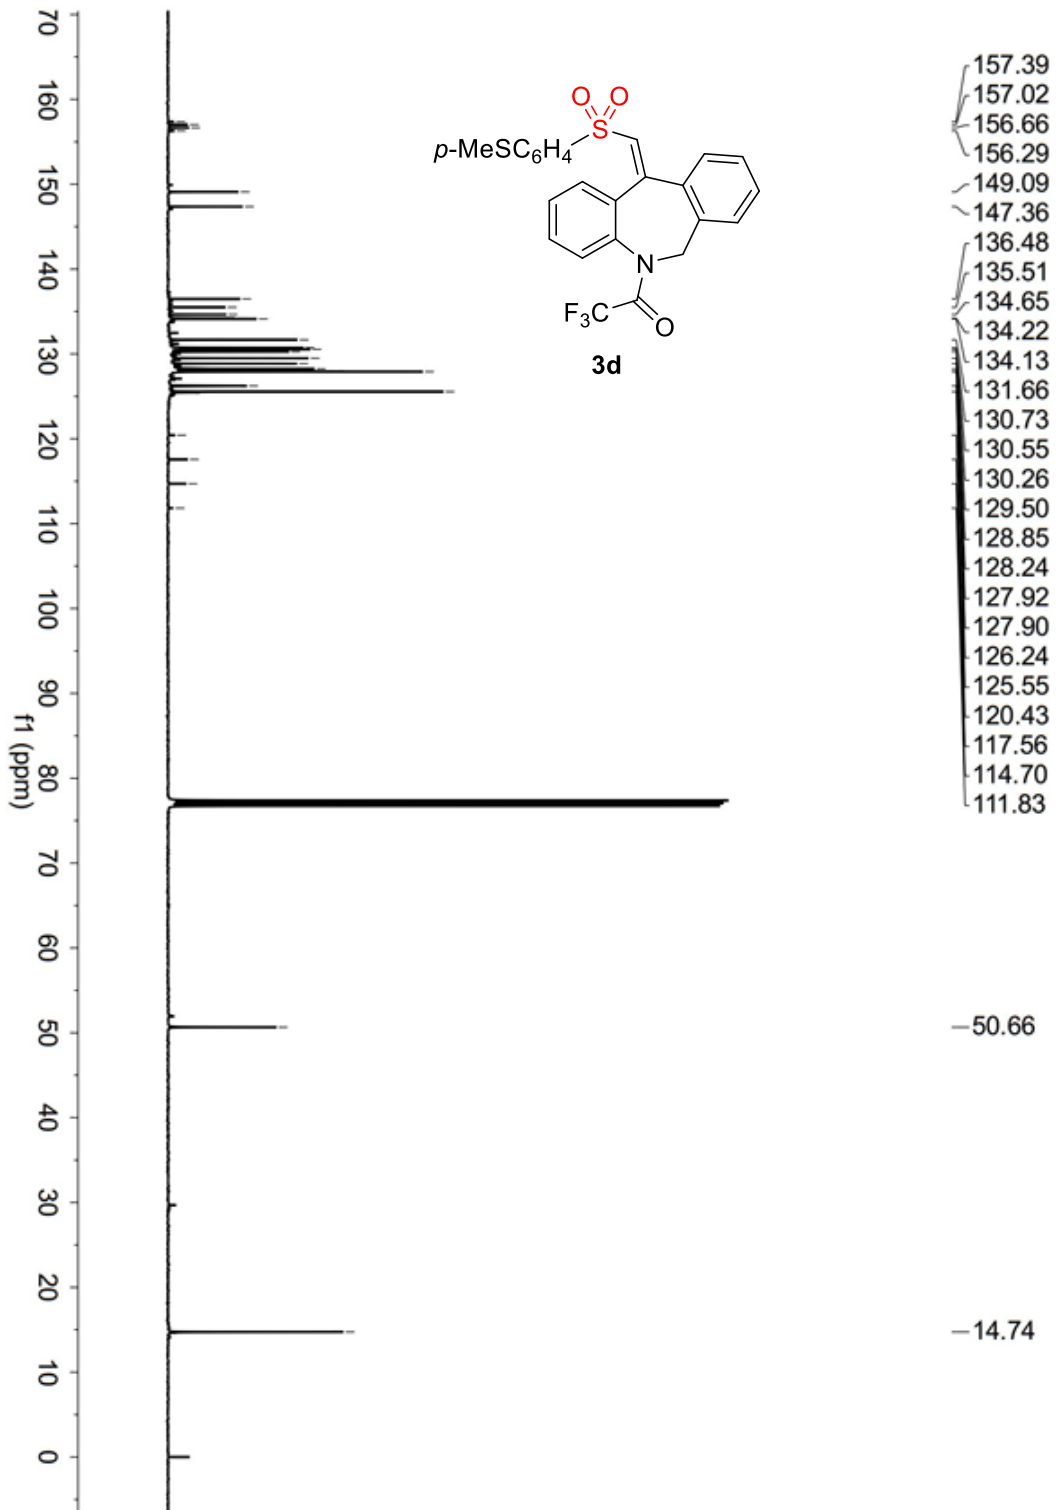

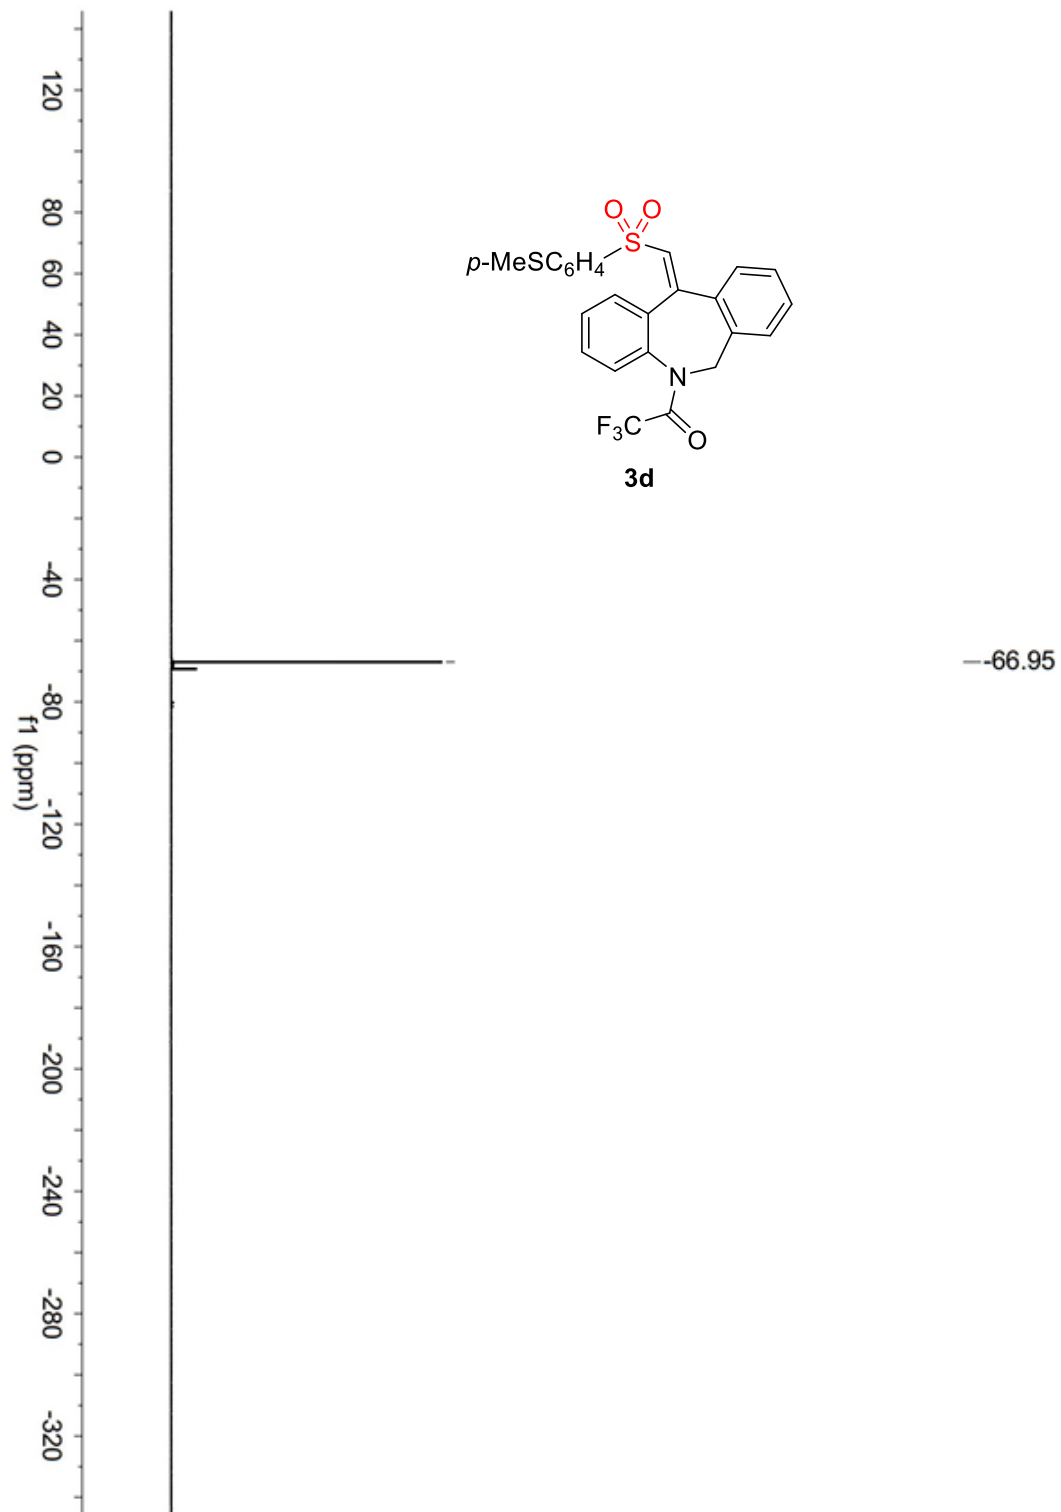

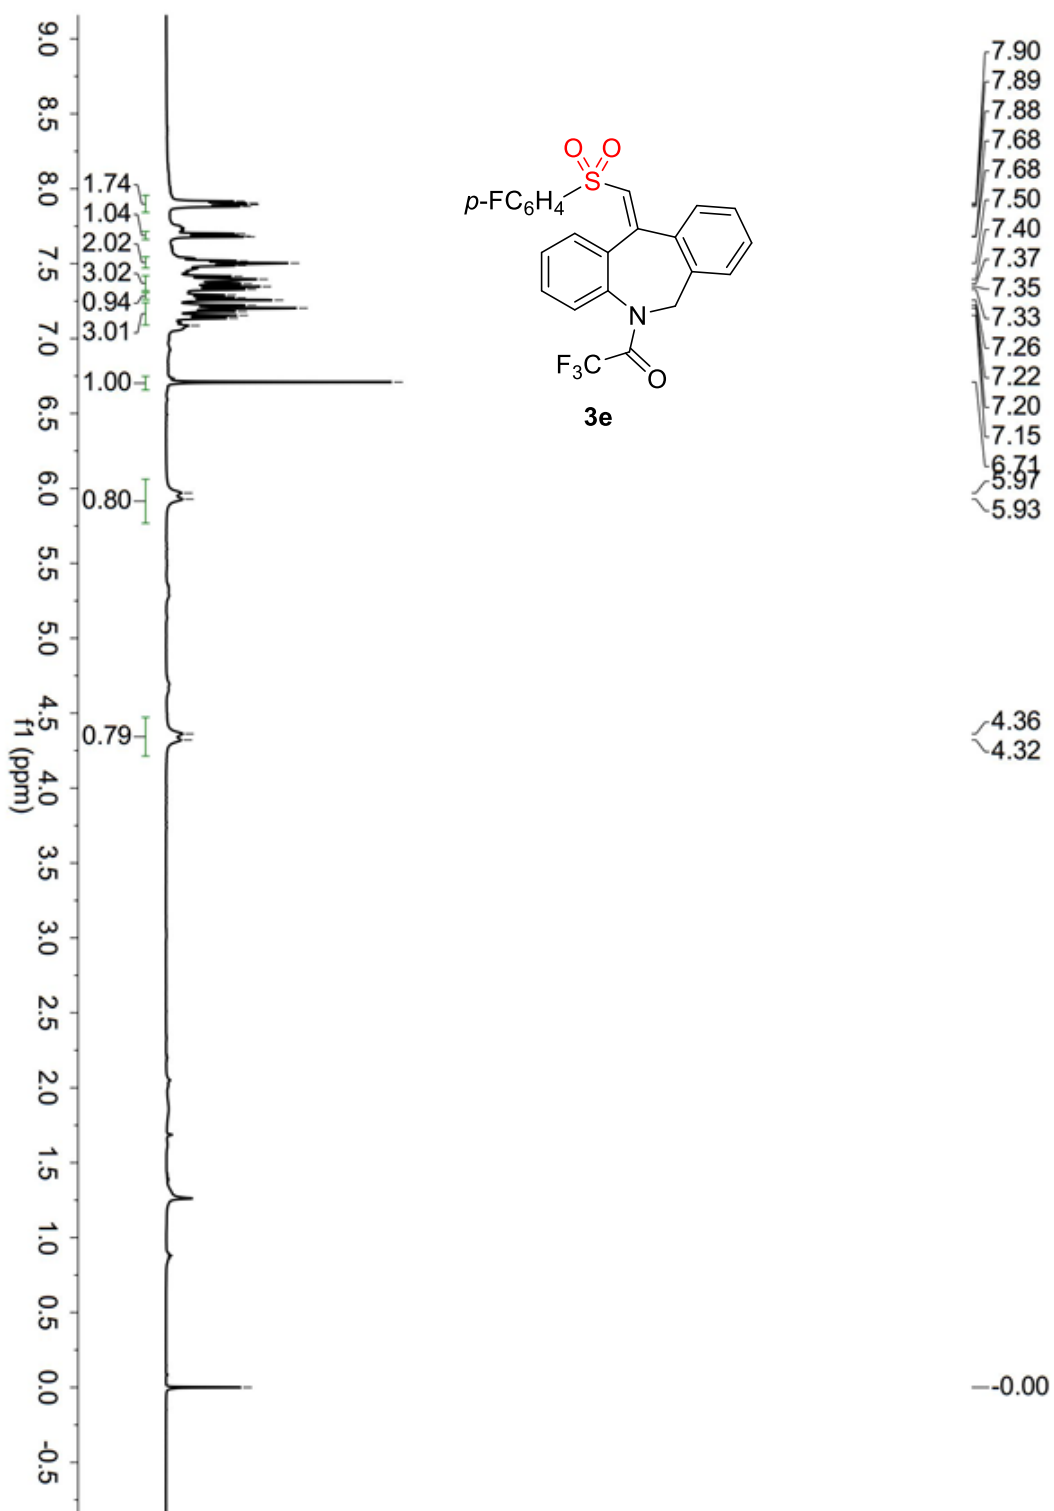

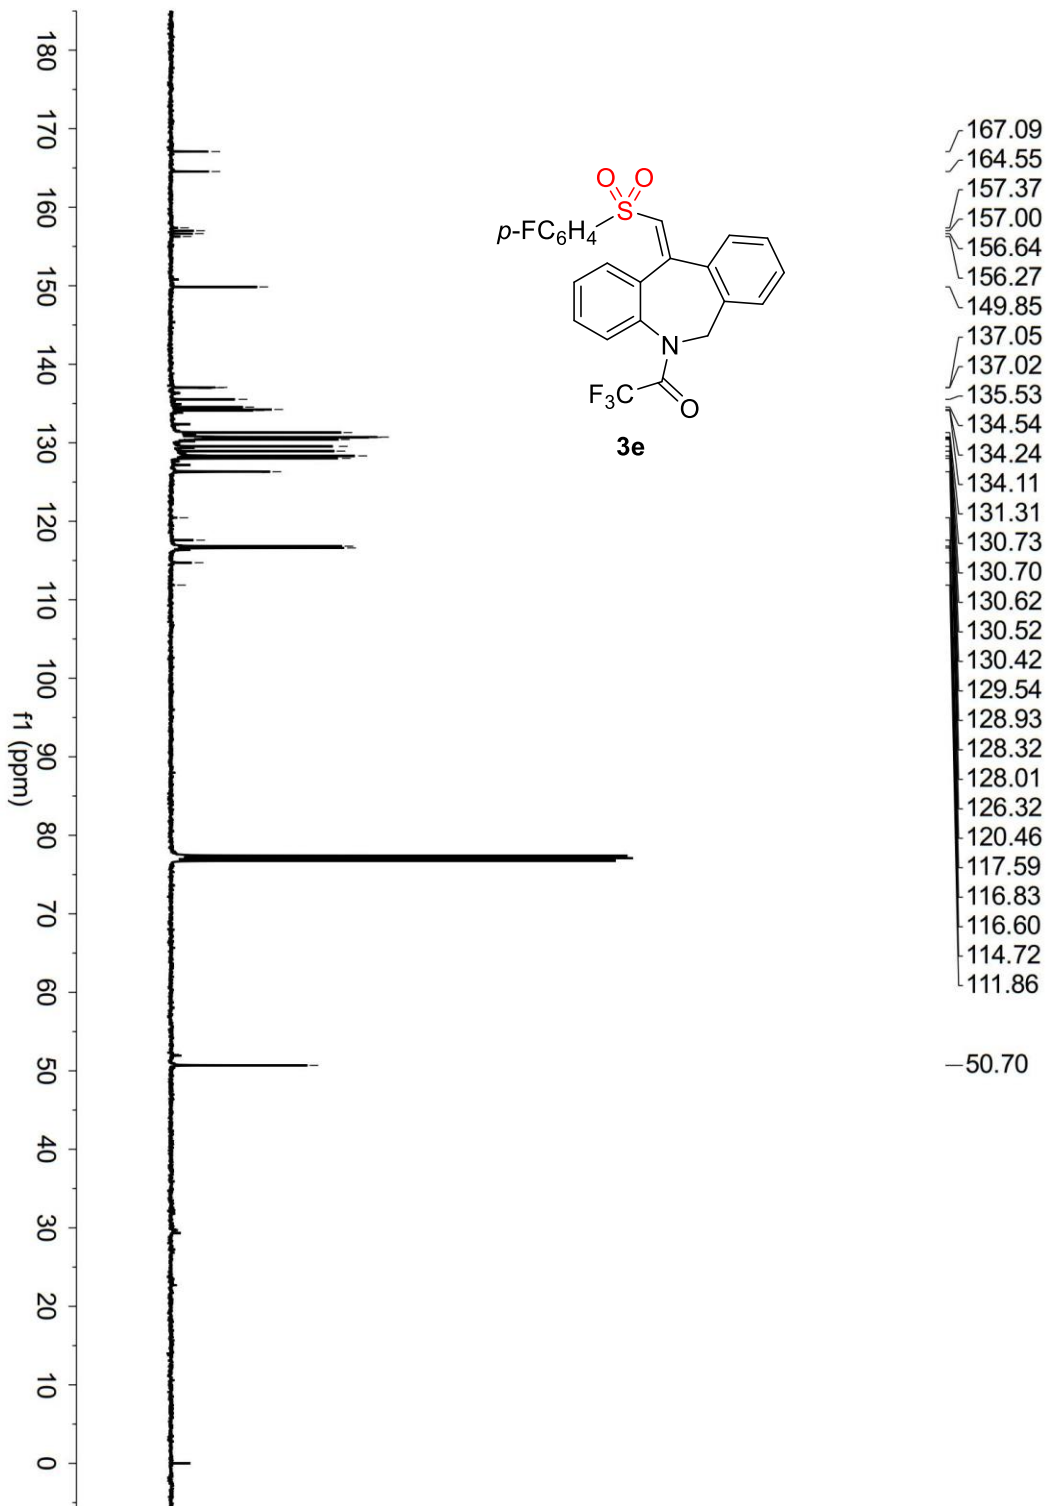

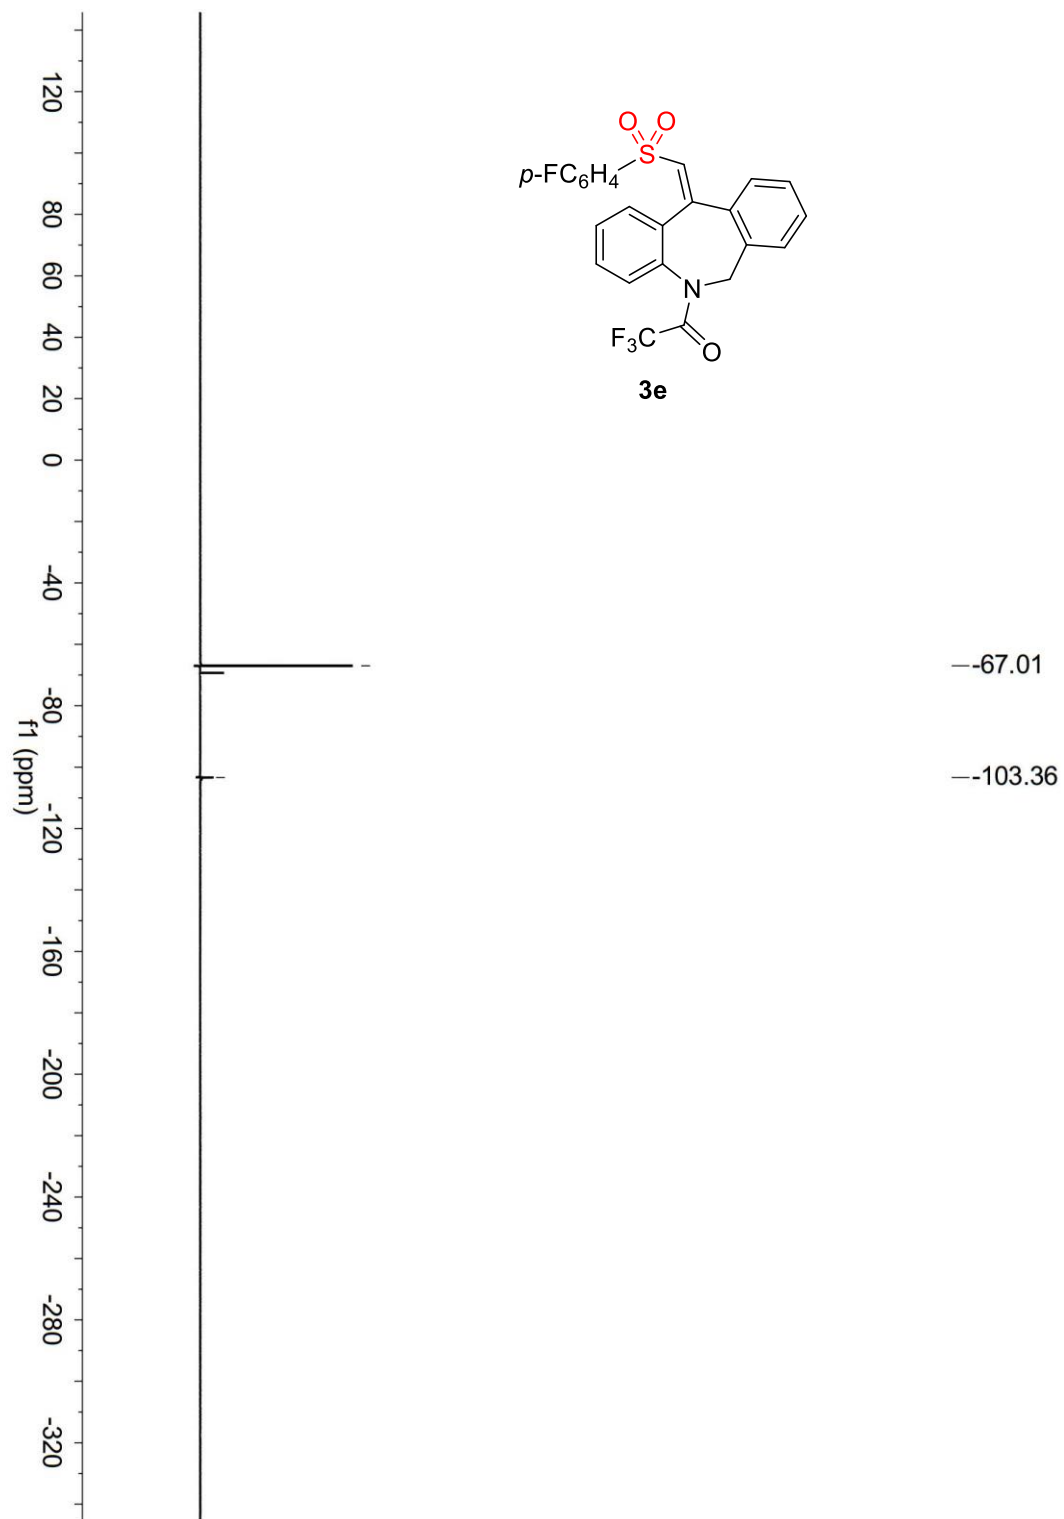

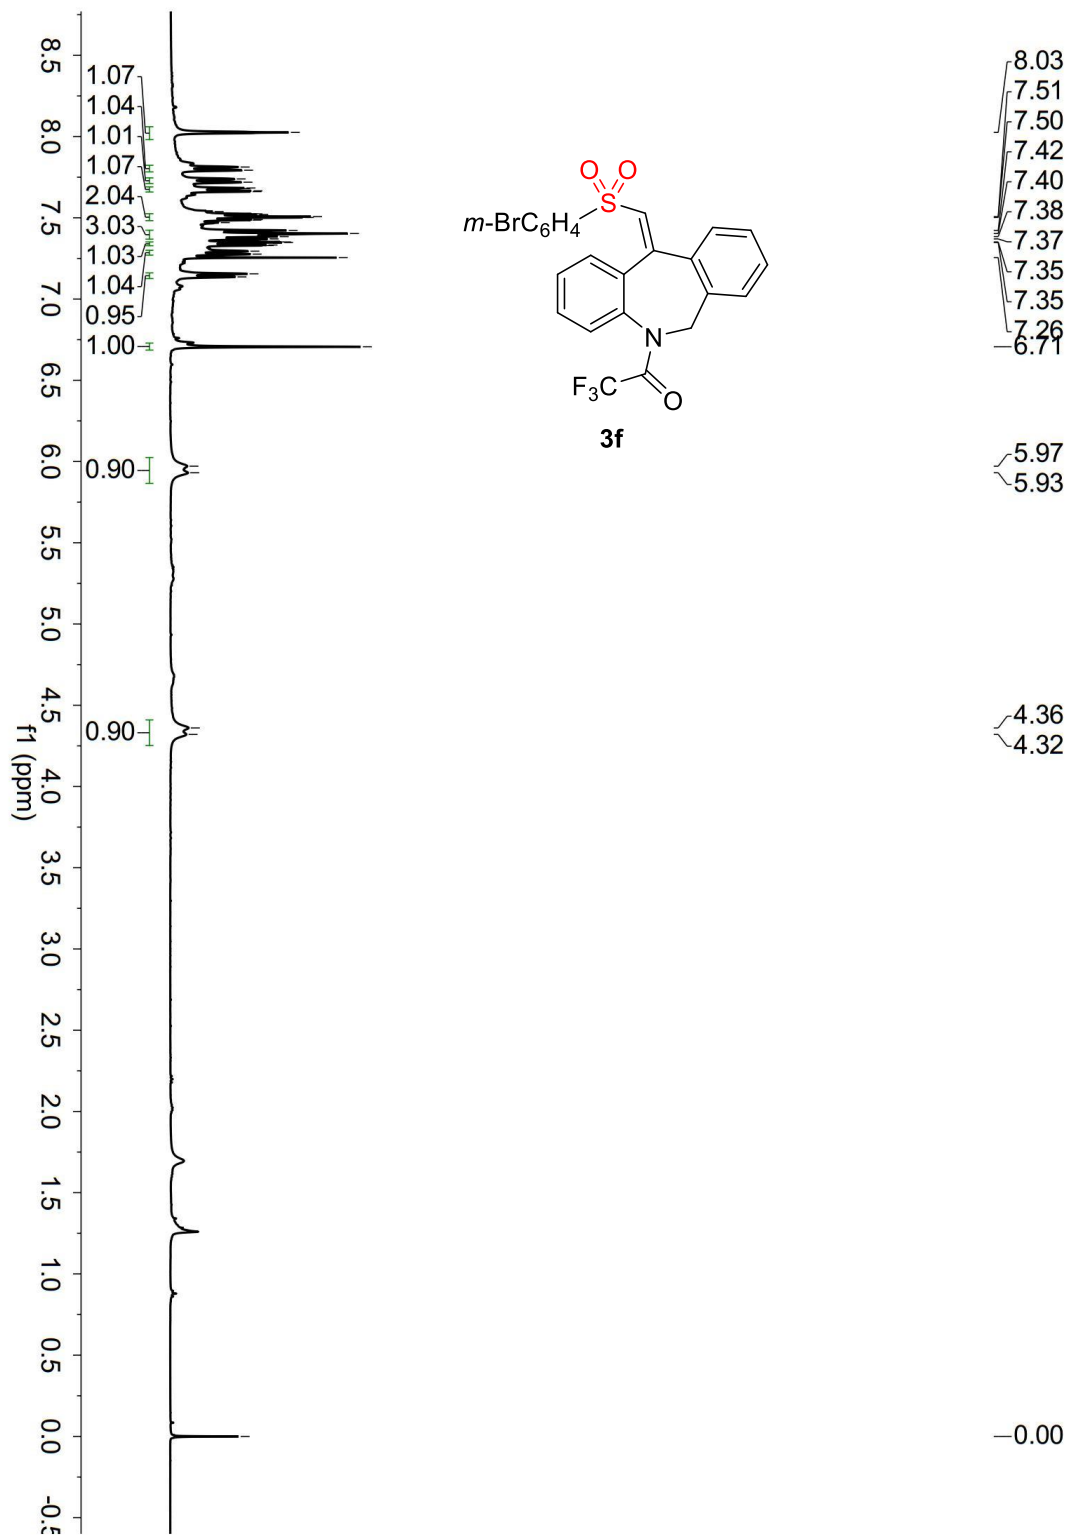

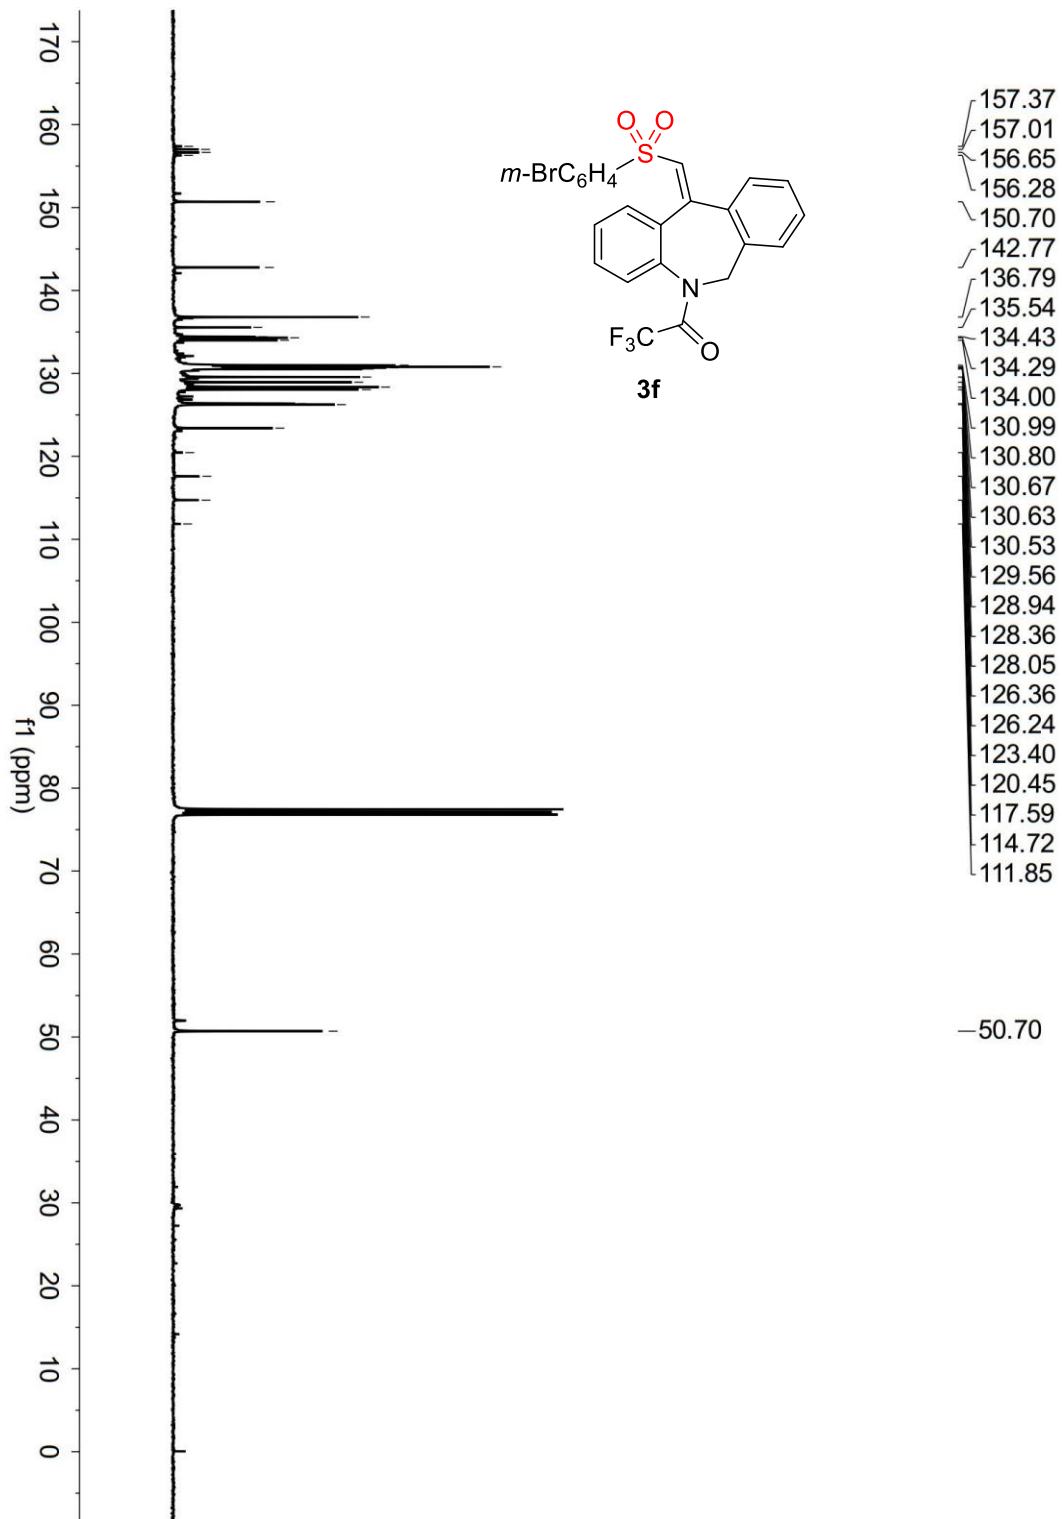

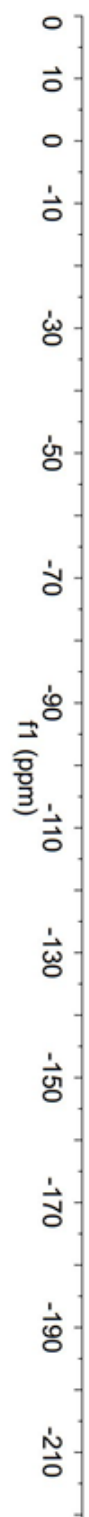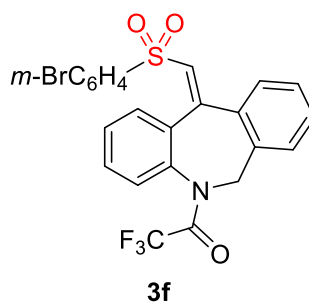

-67.02



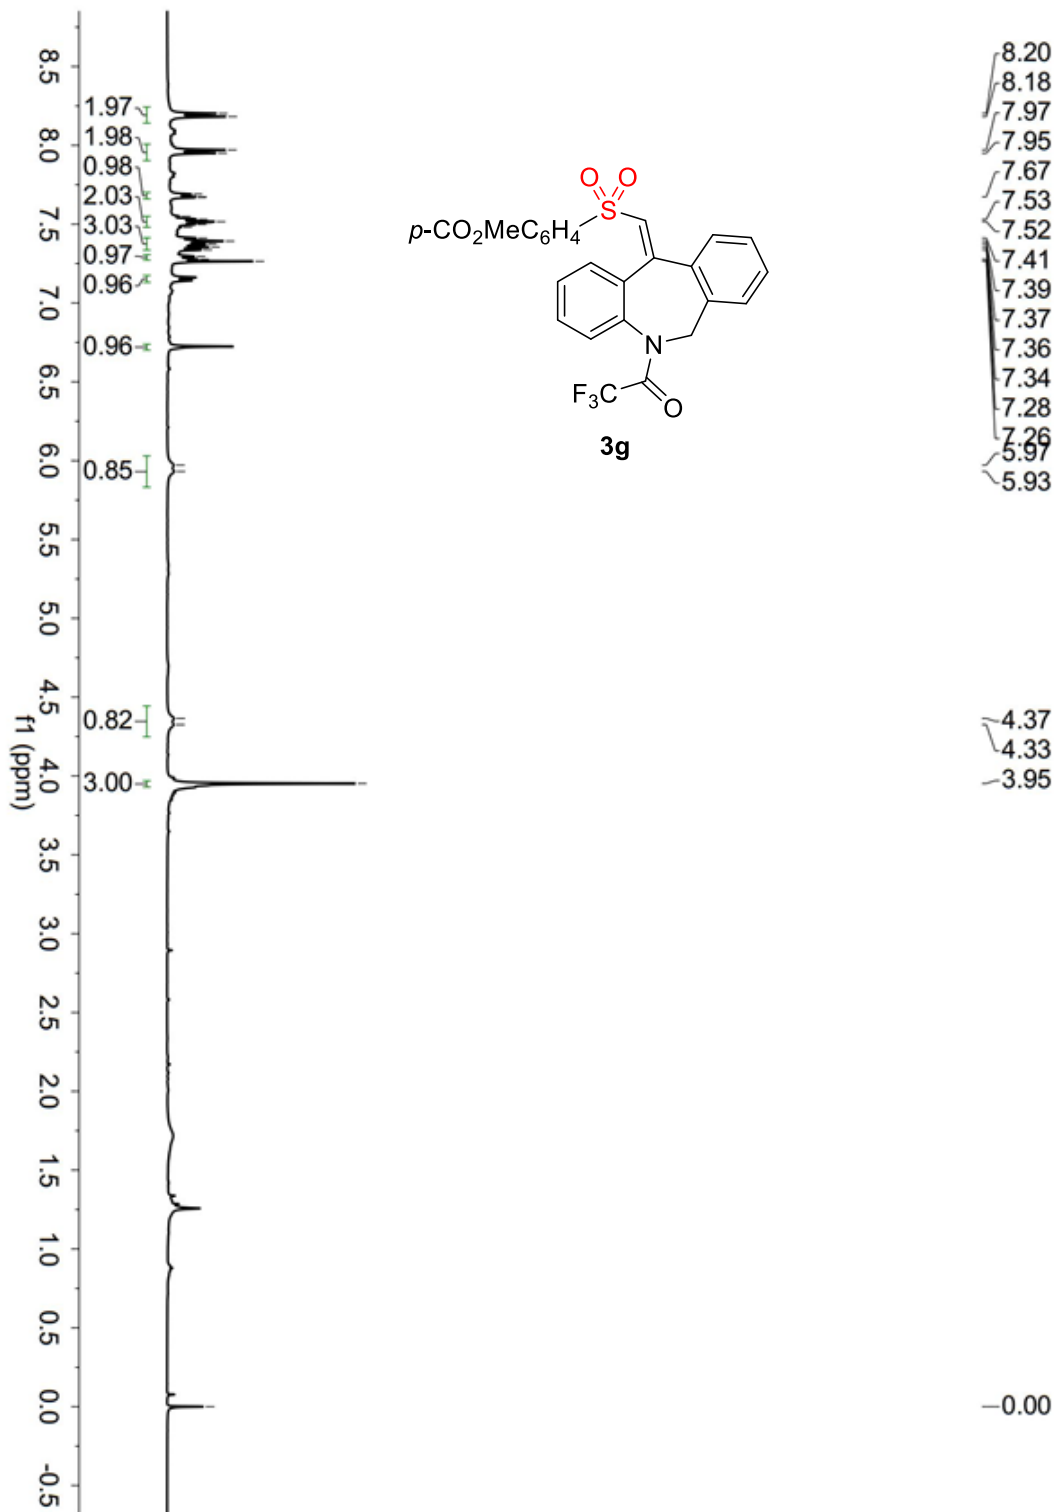

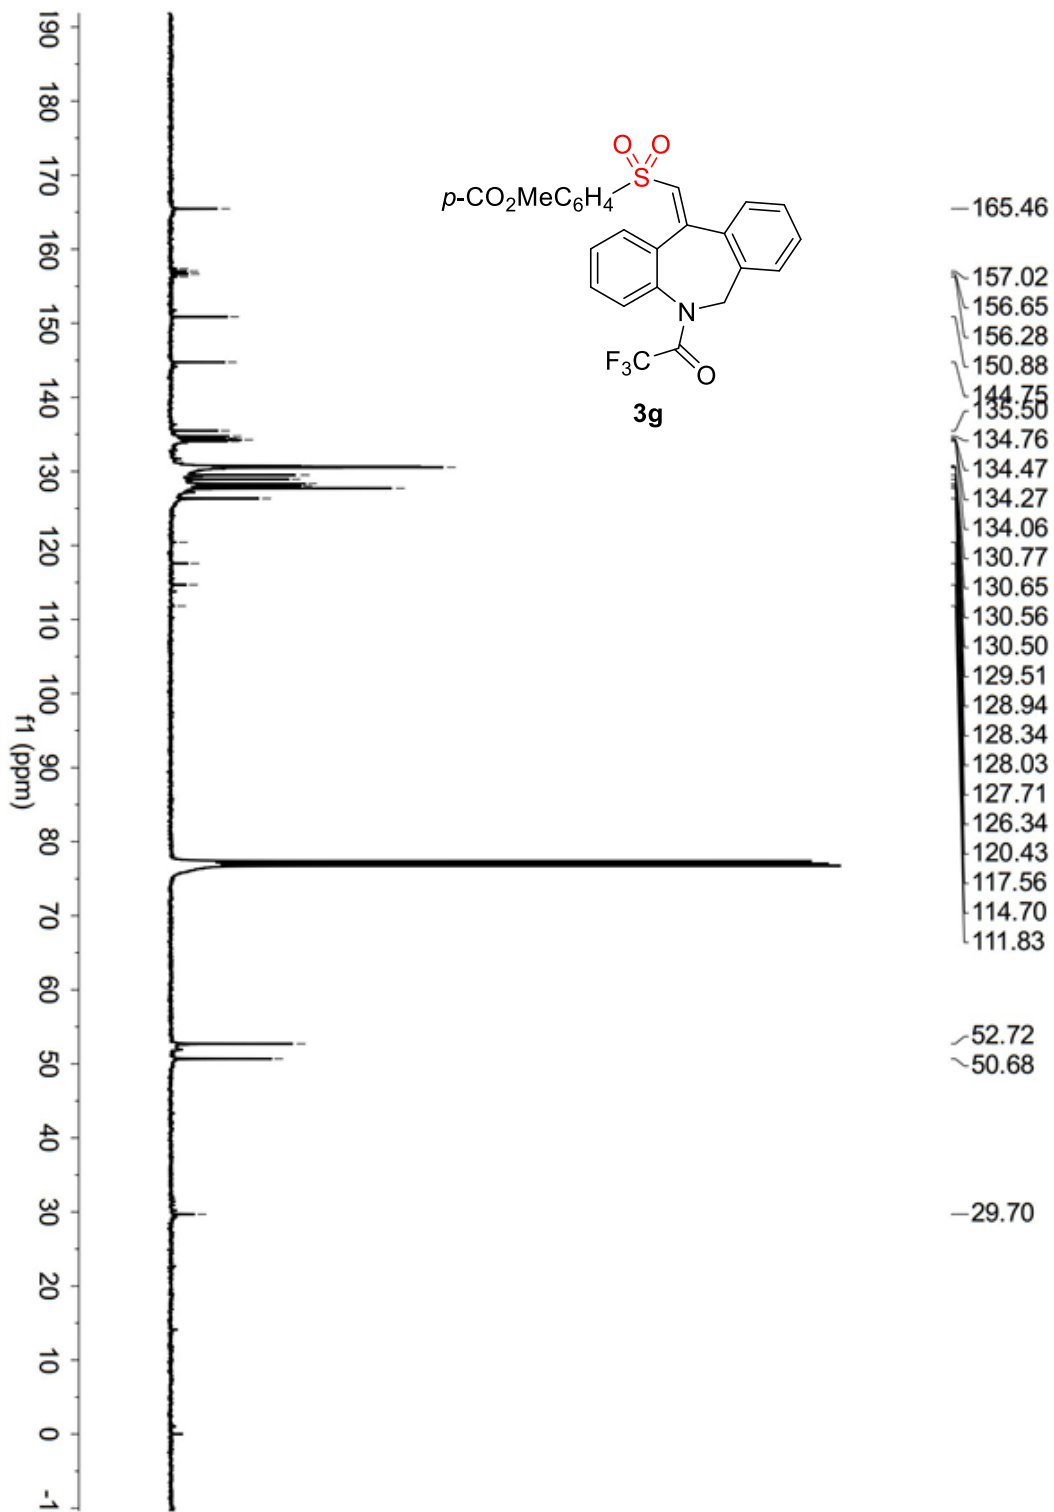

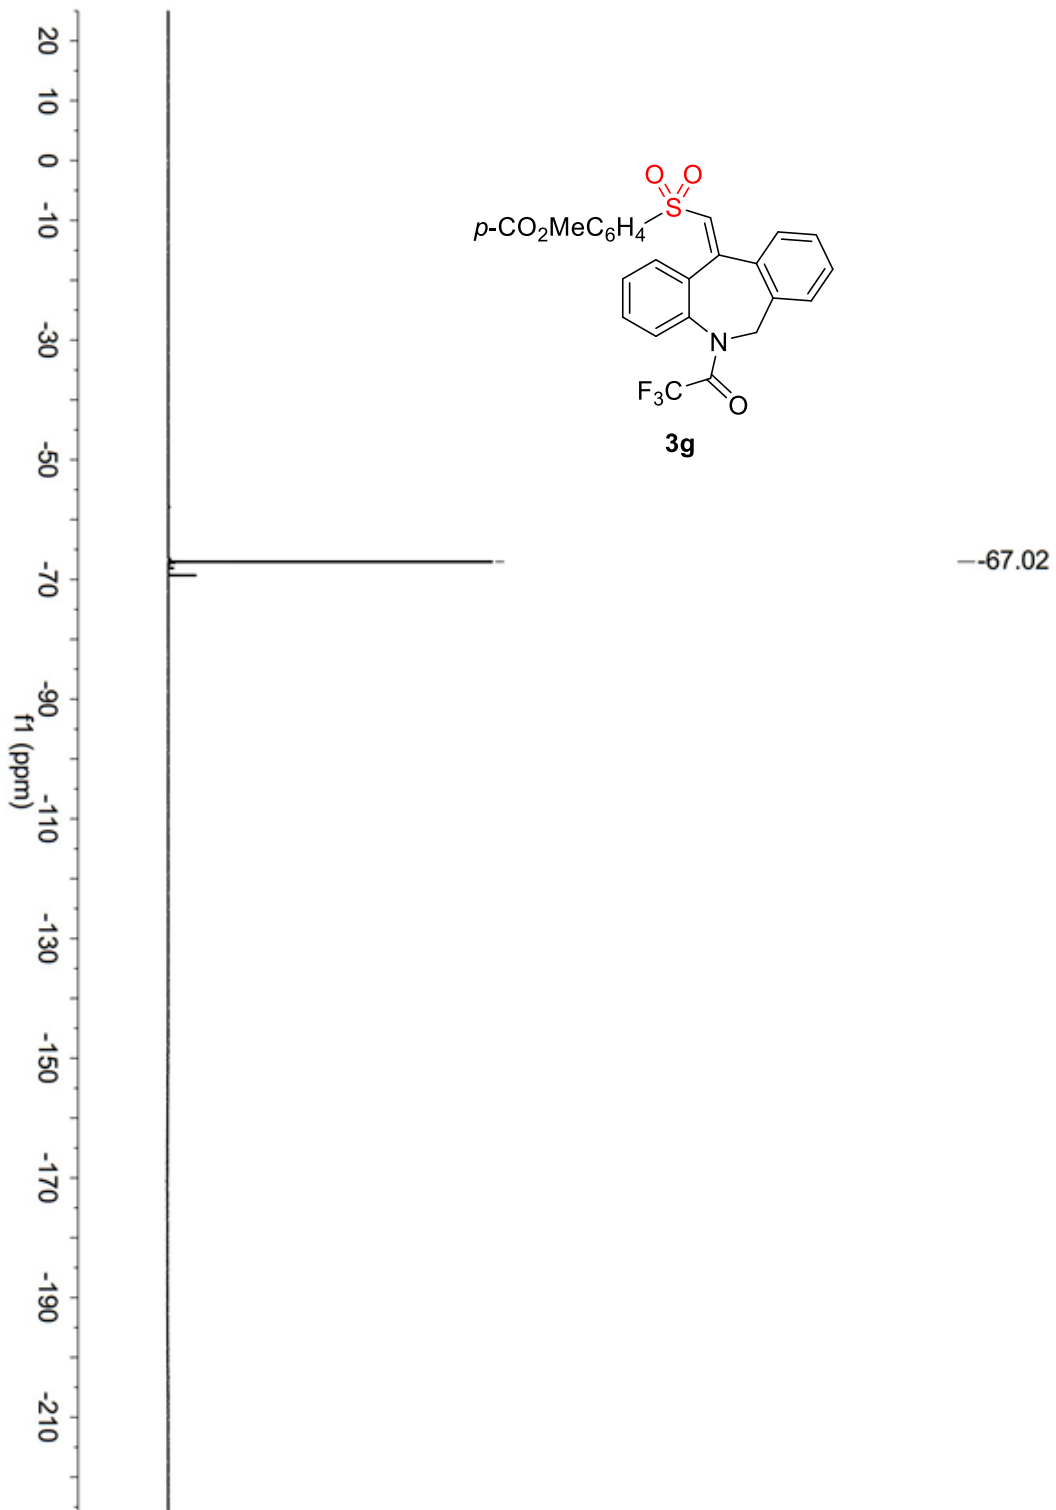

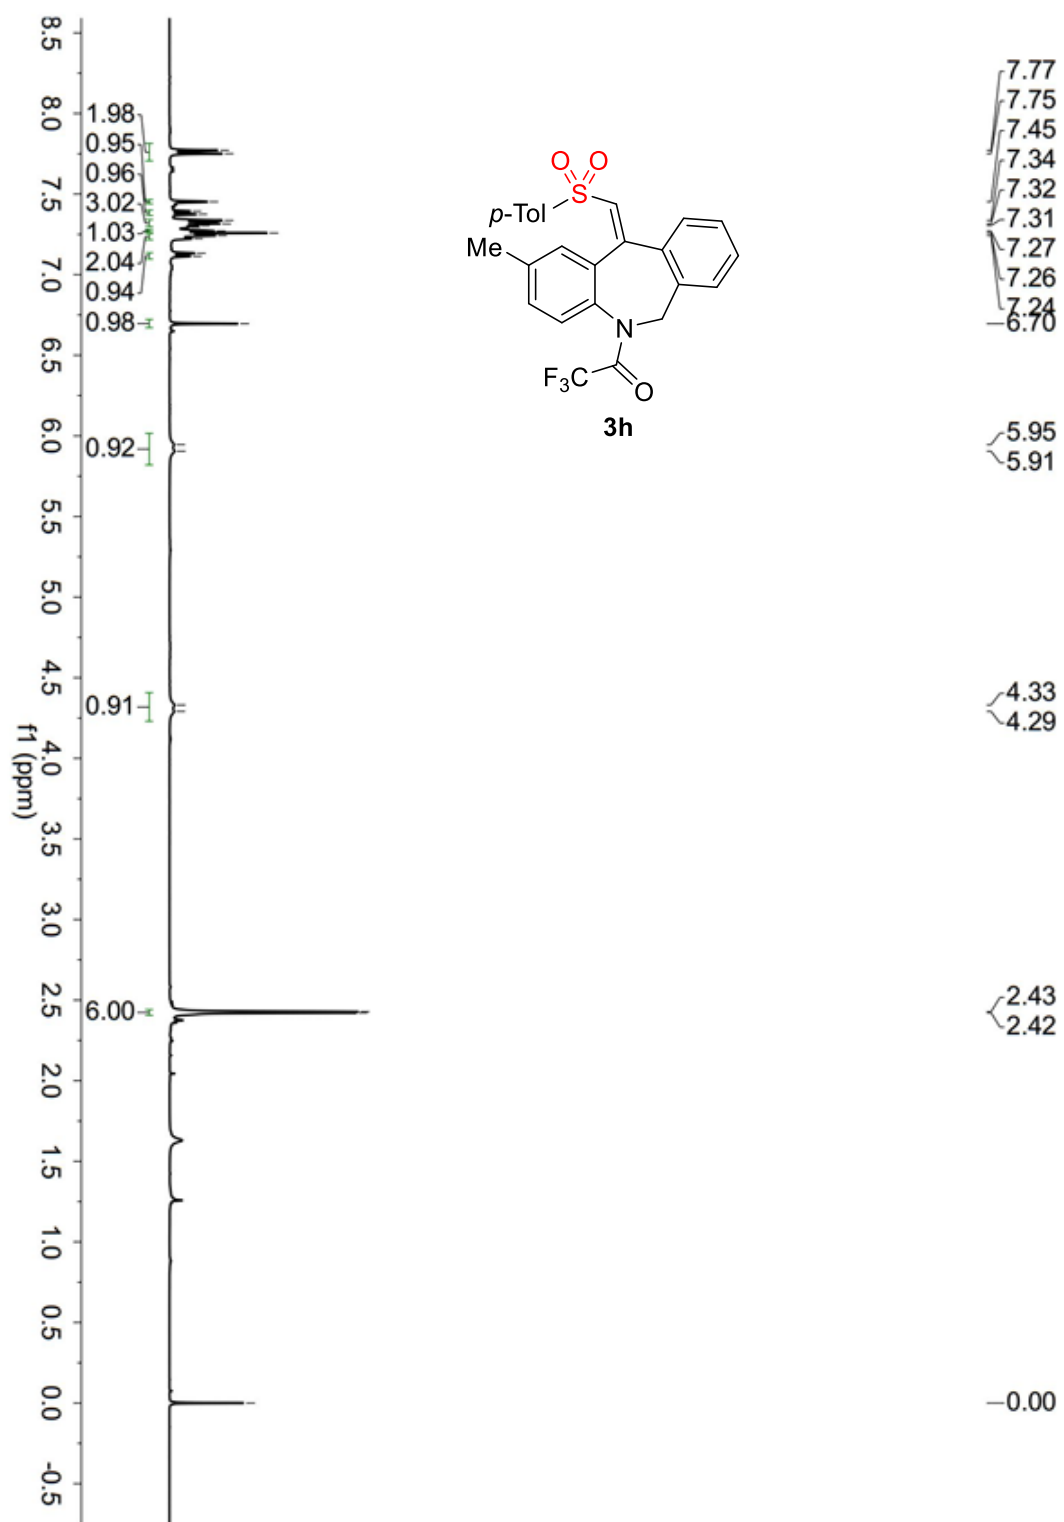

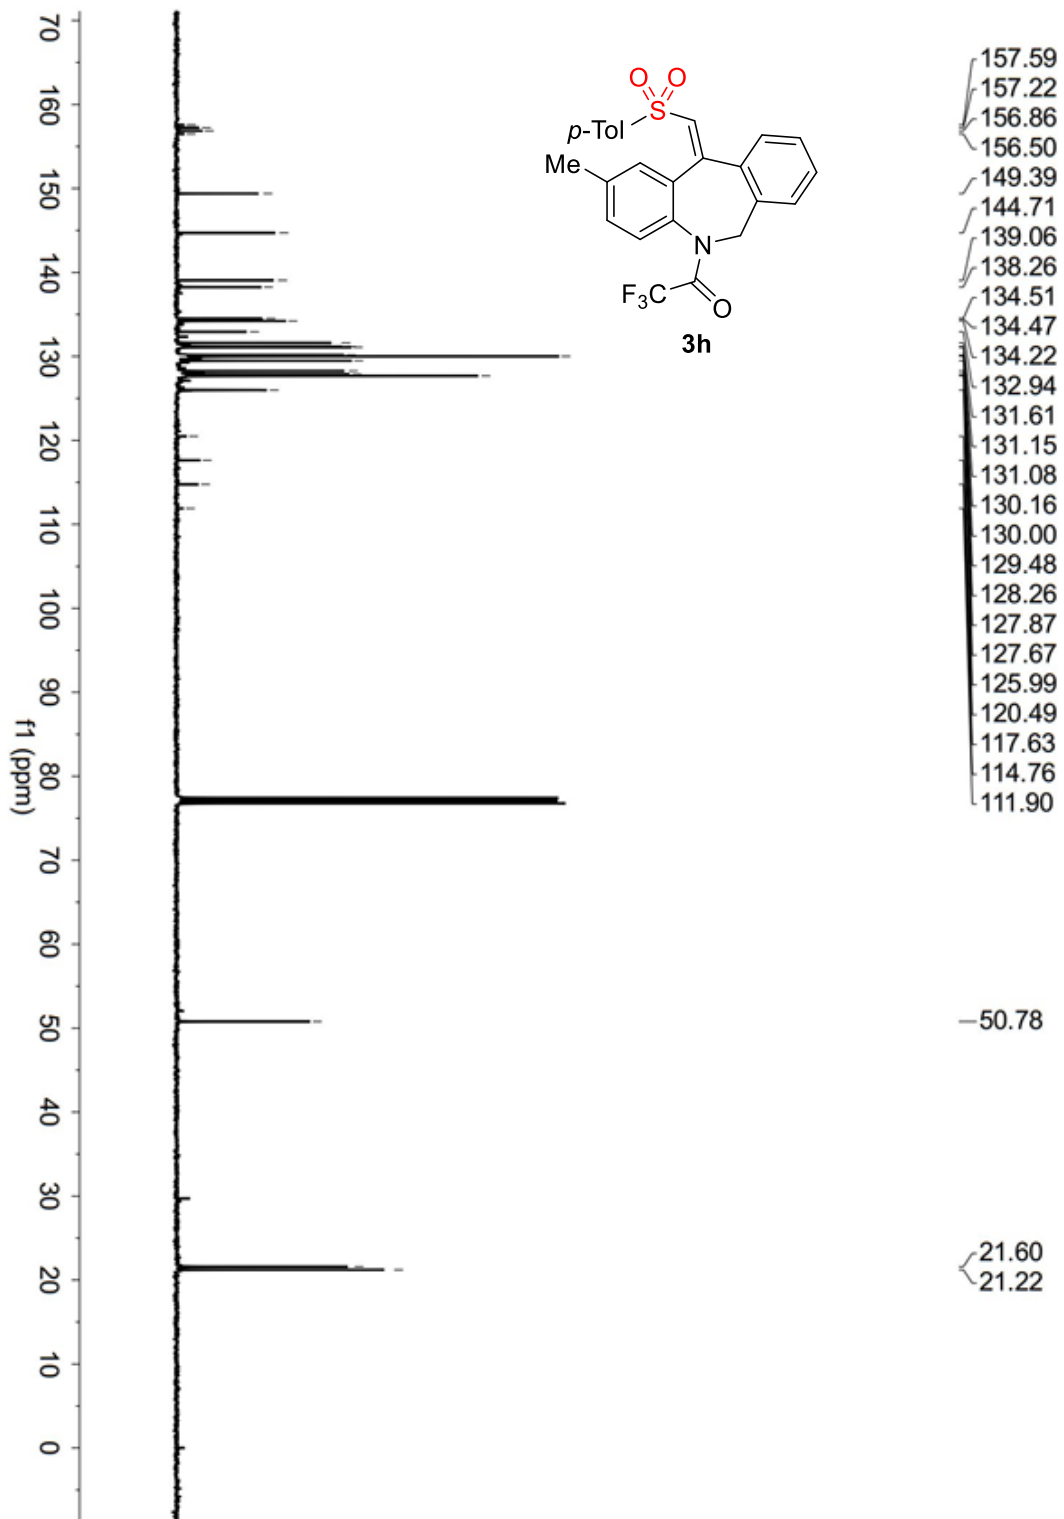

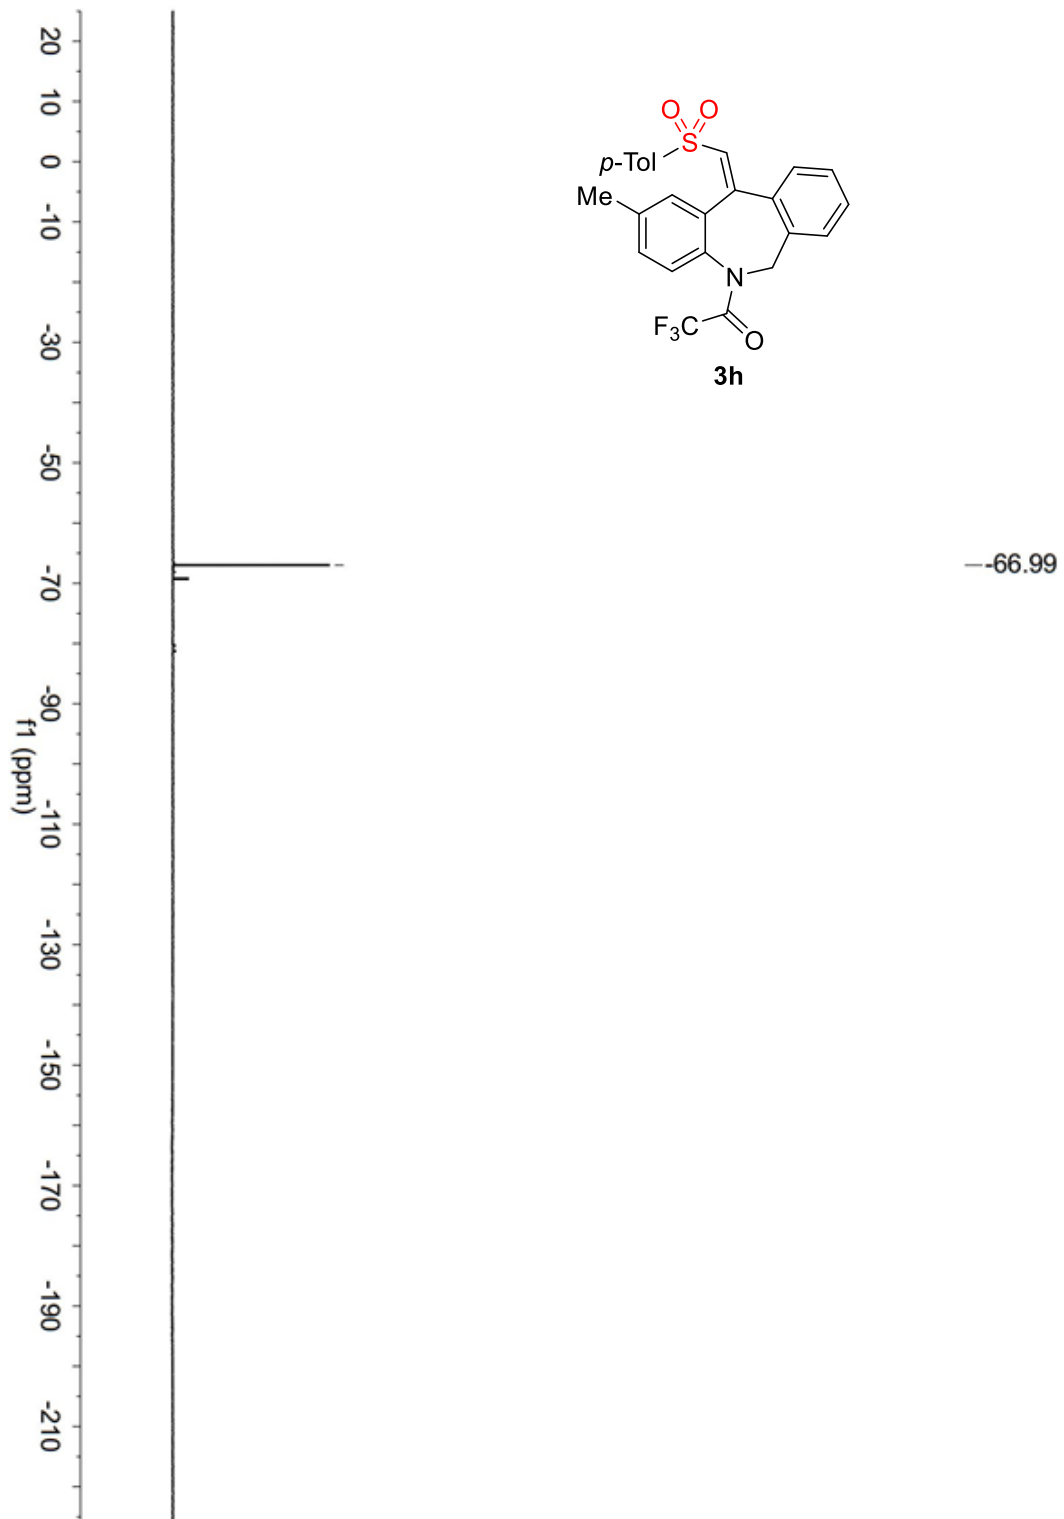

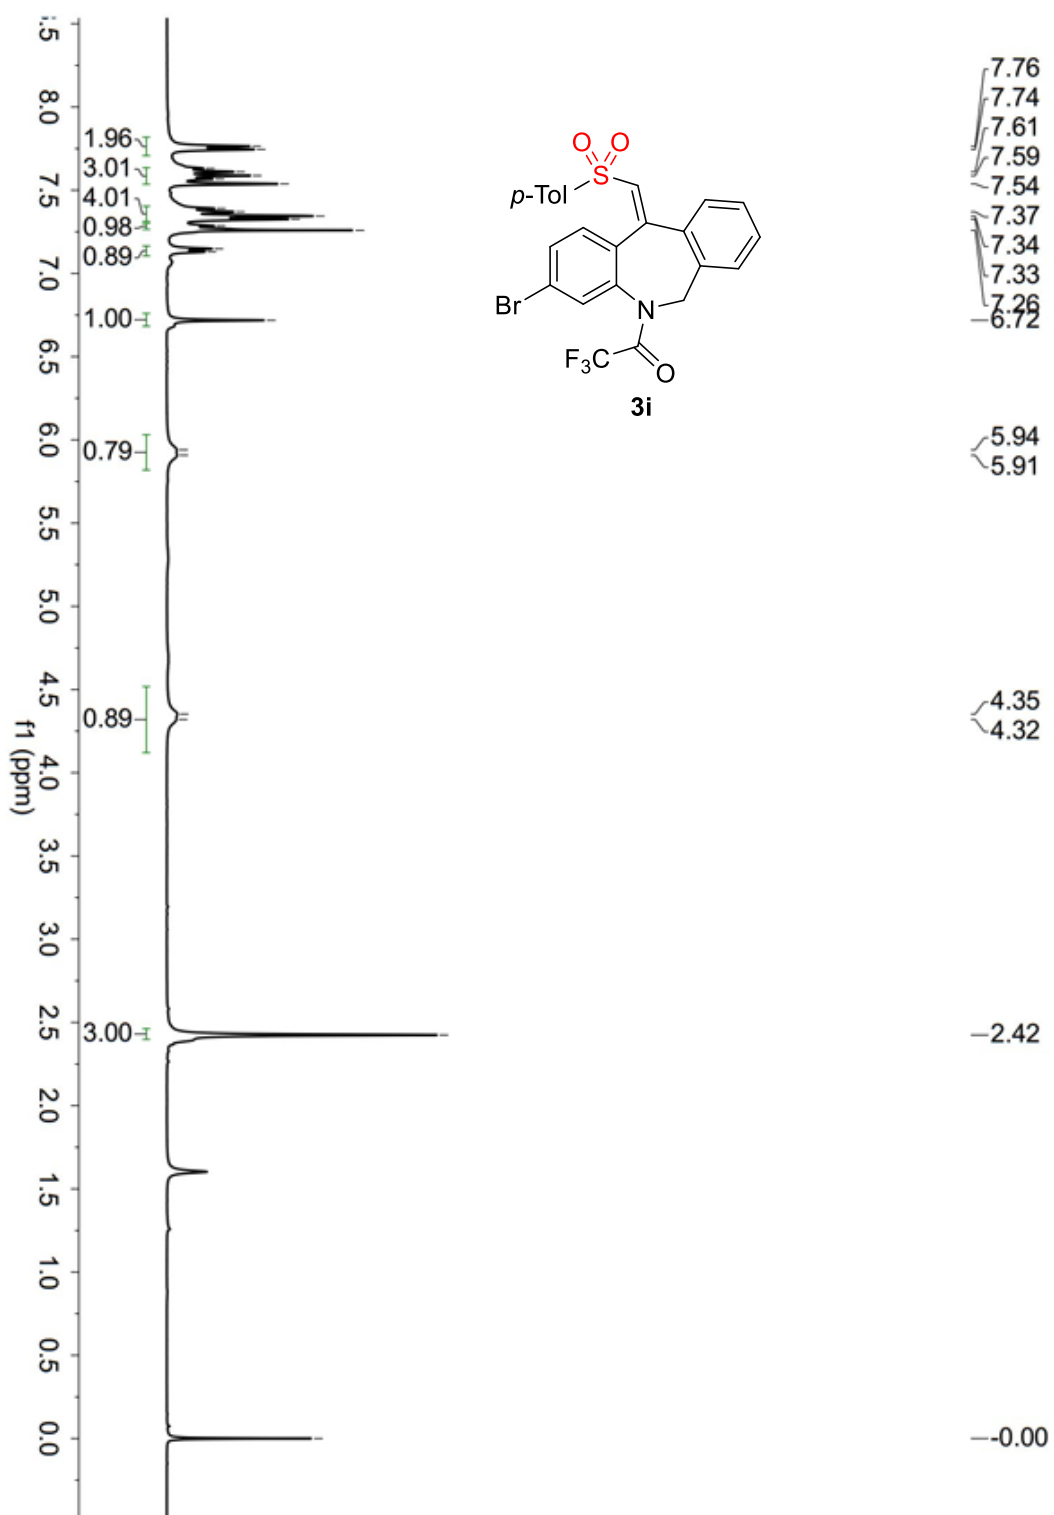

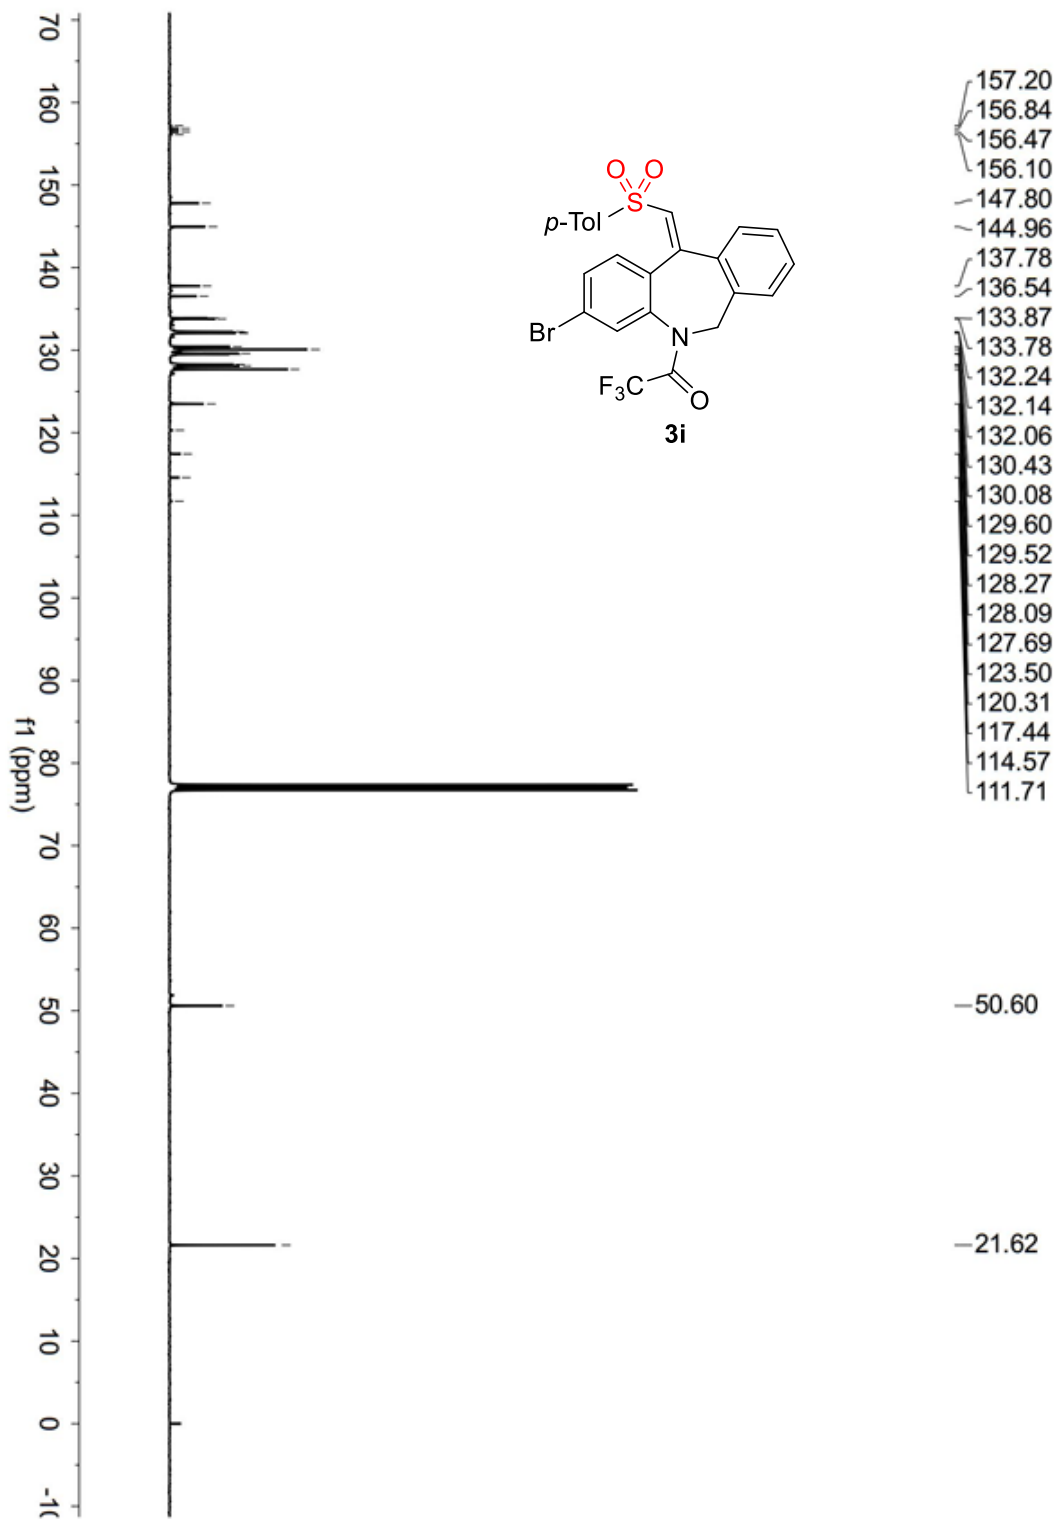



20  
10  
0  
-10  
-30  
-50  
-70  
-90  
-110  
-130  
-150  
-170  
-190  
-210

f1 (ppm)

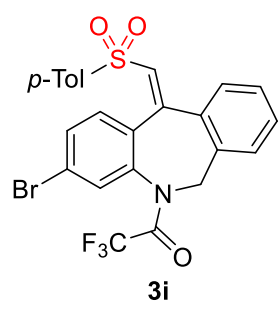

—67.03

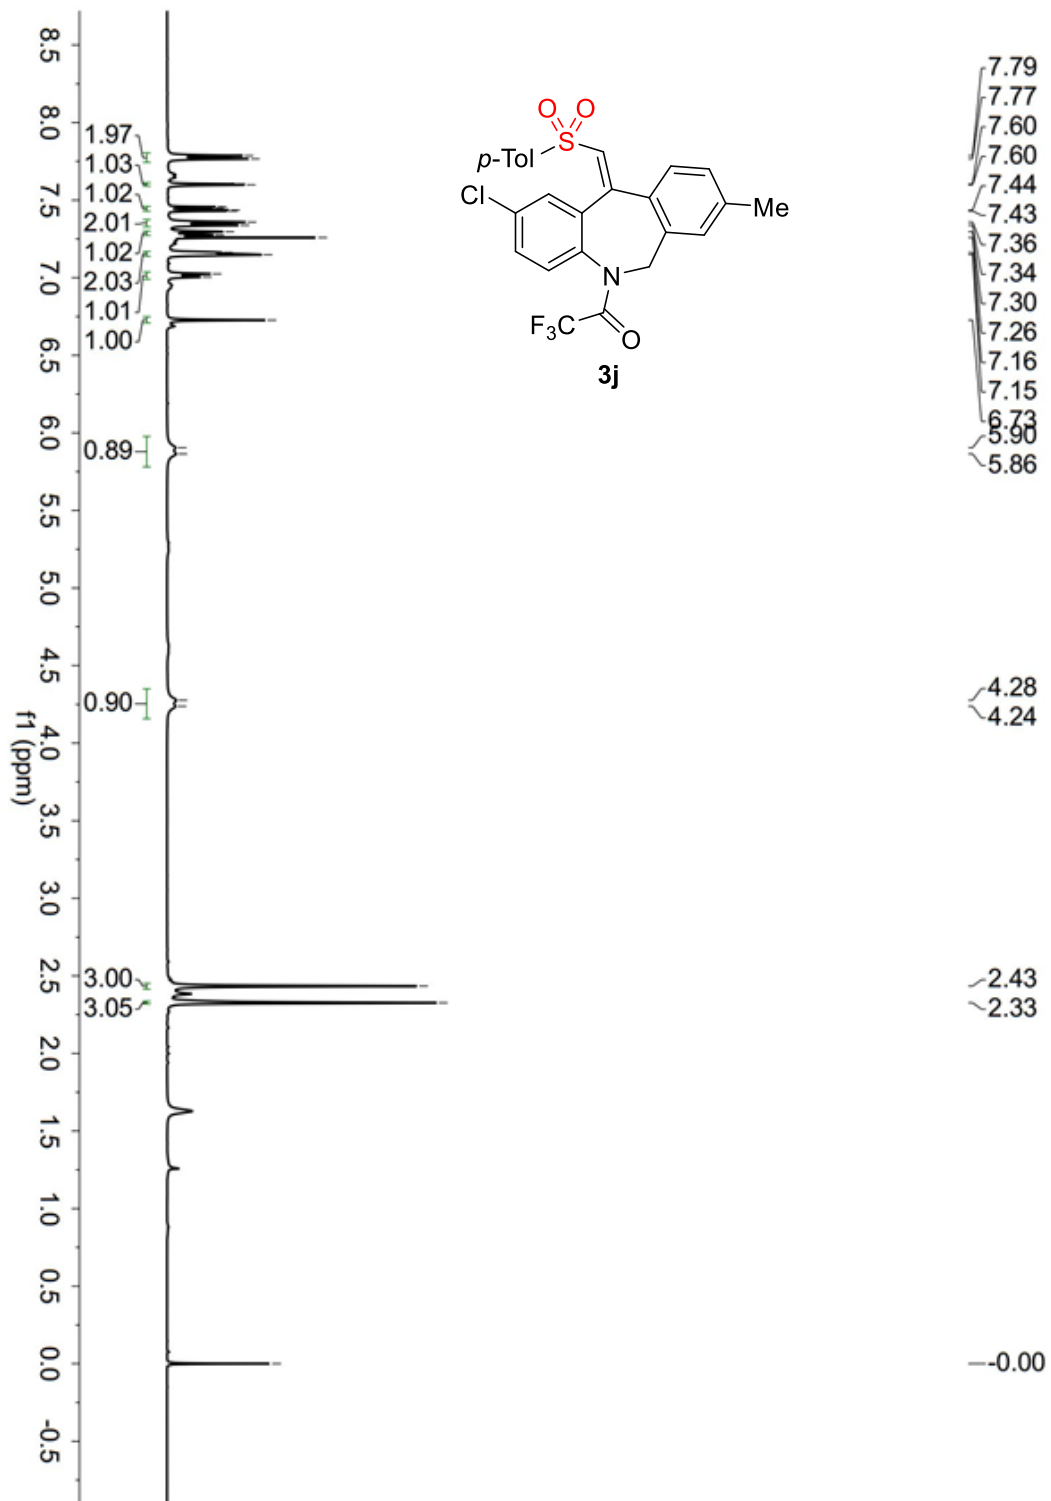

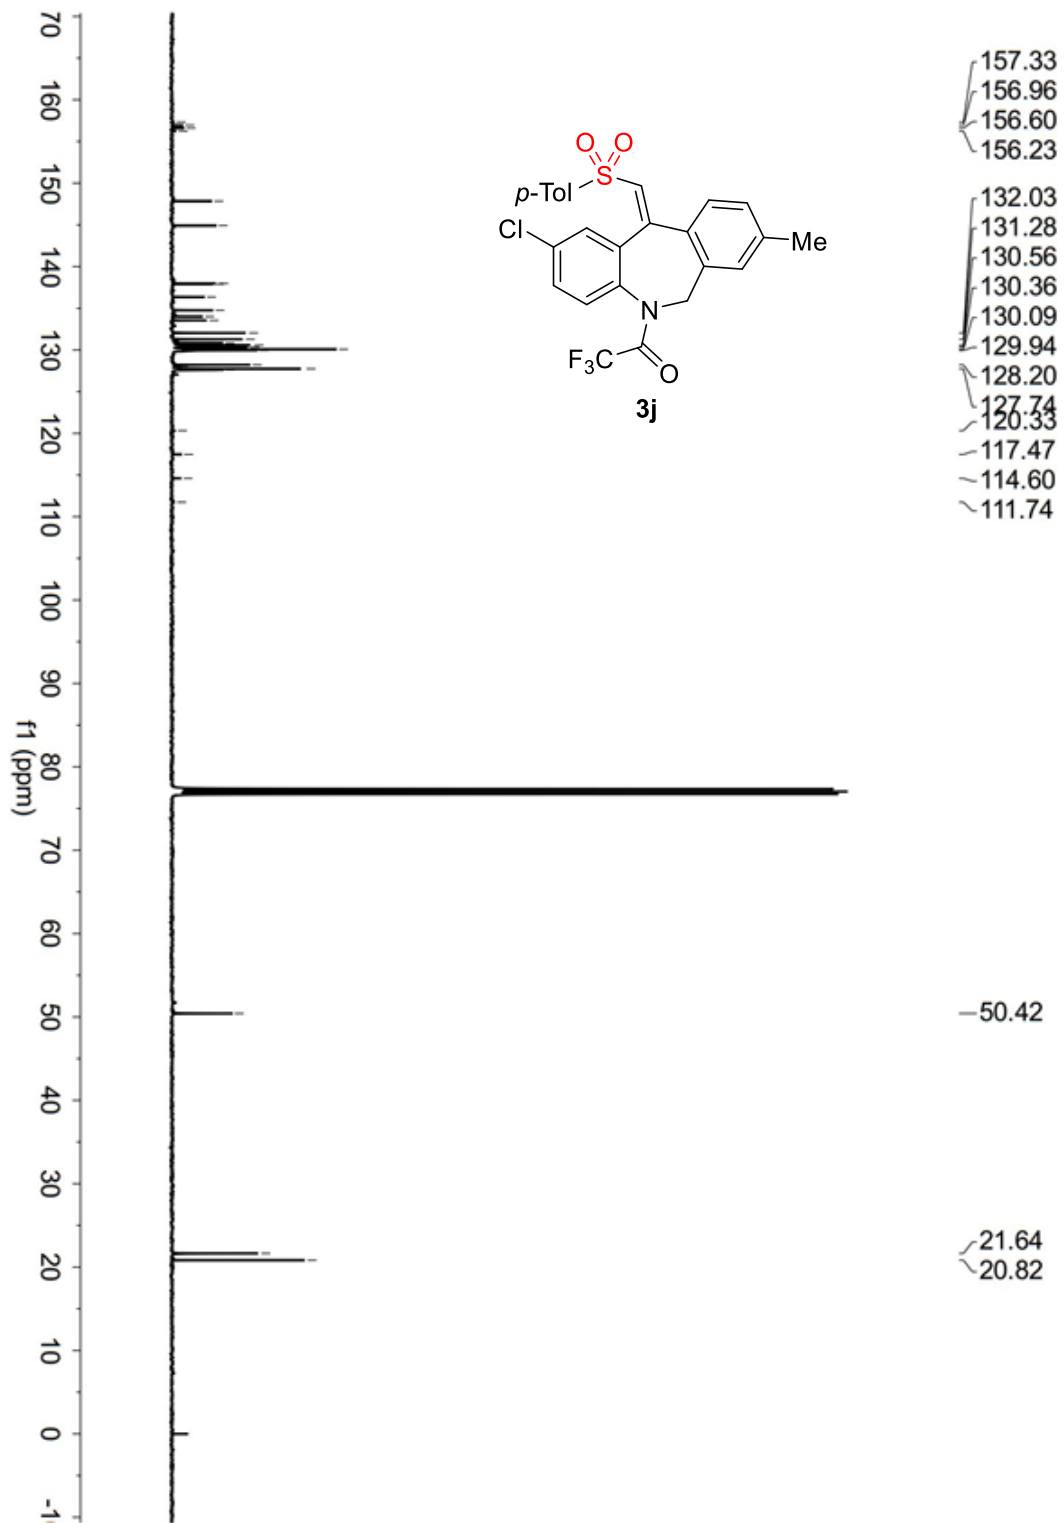

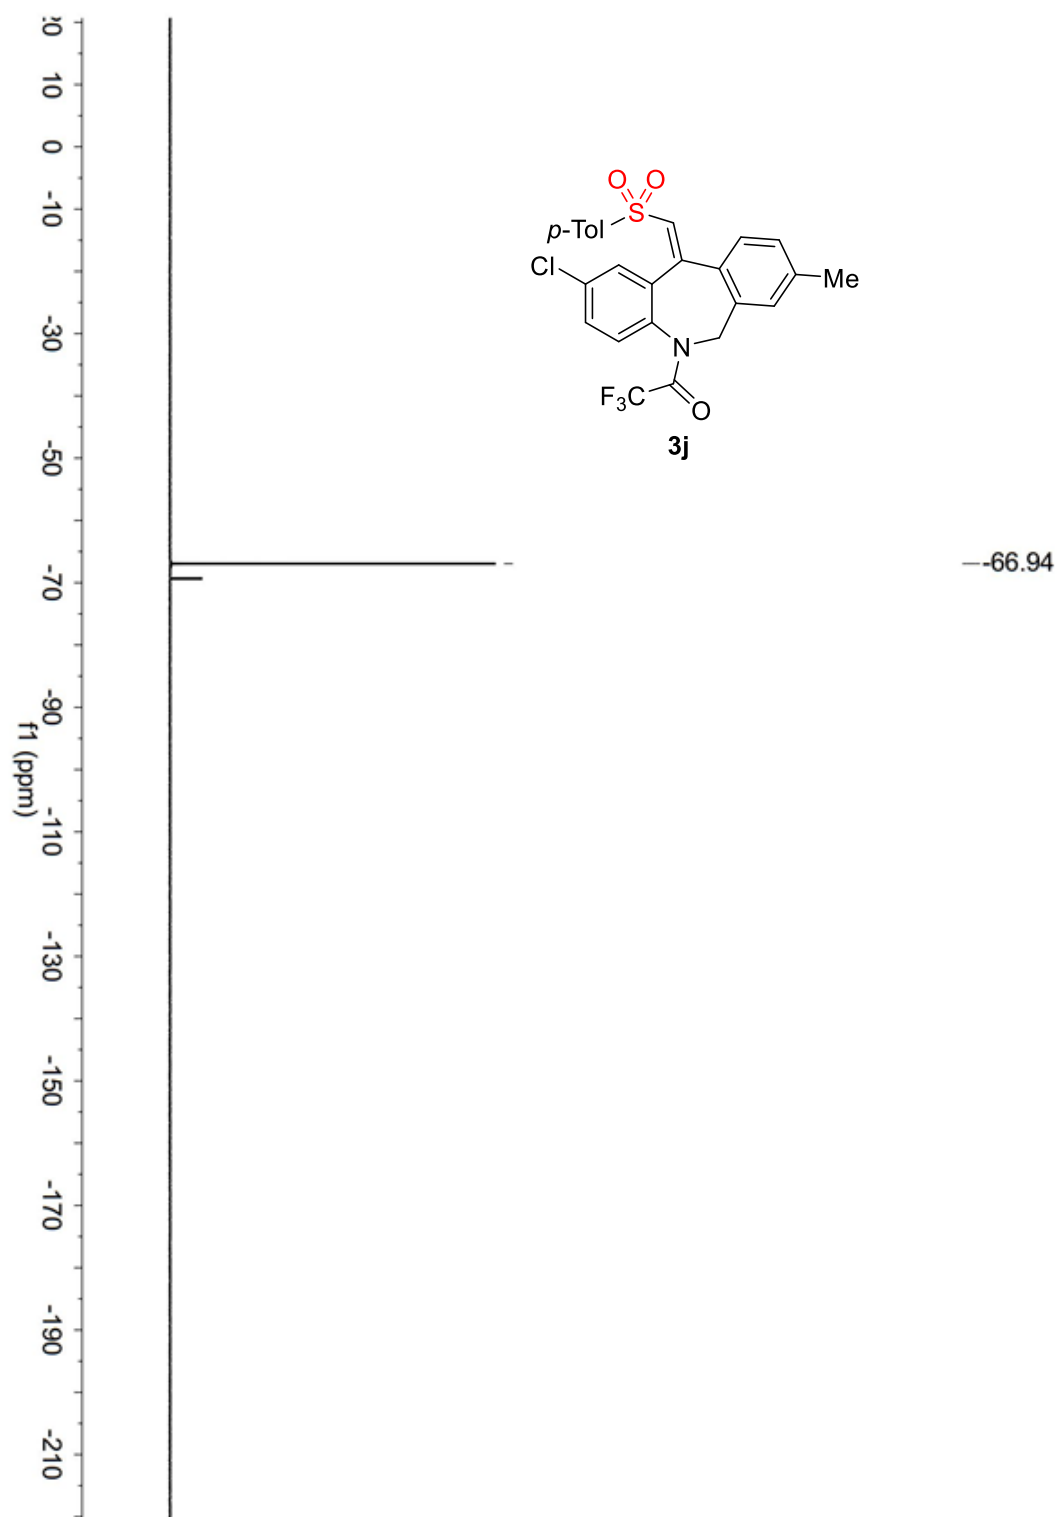

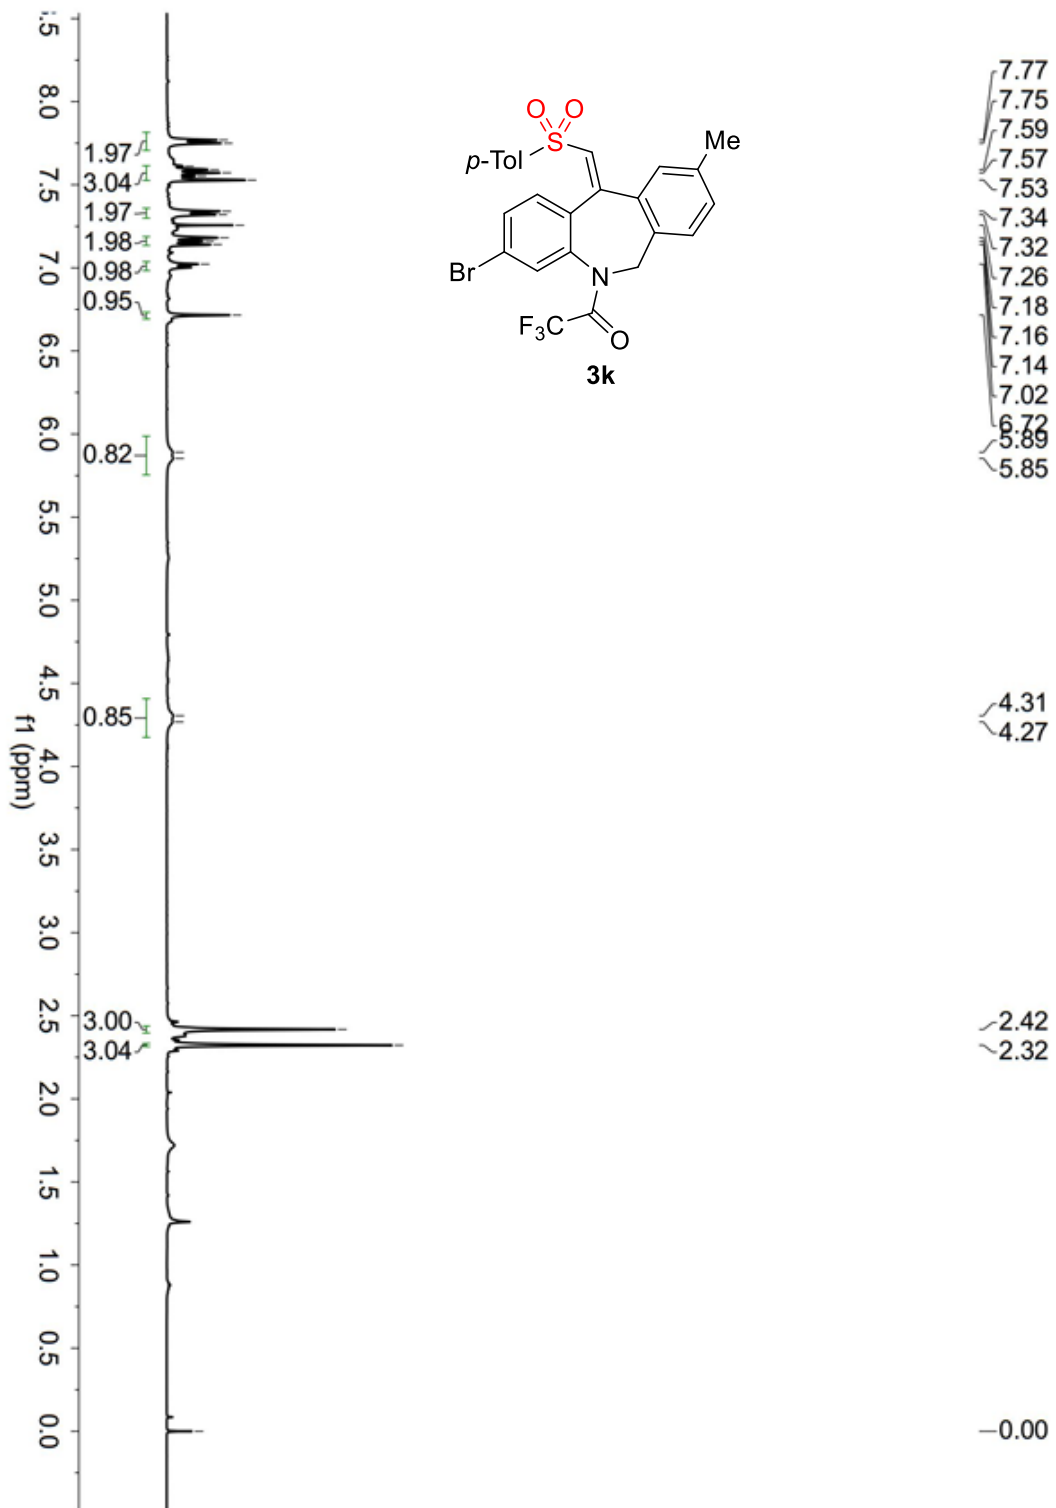

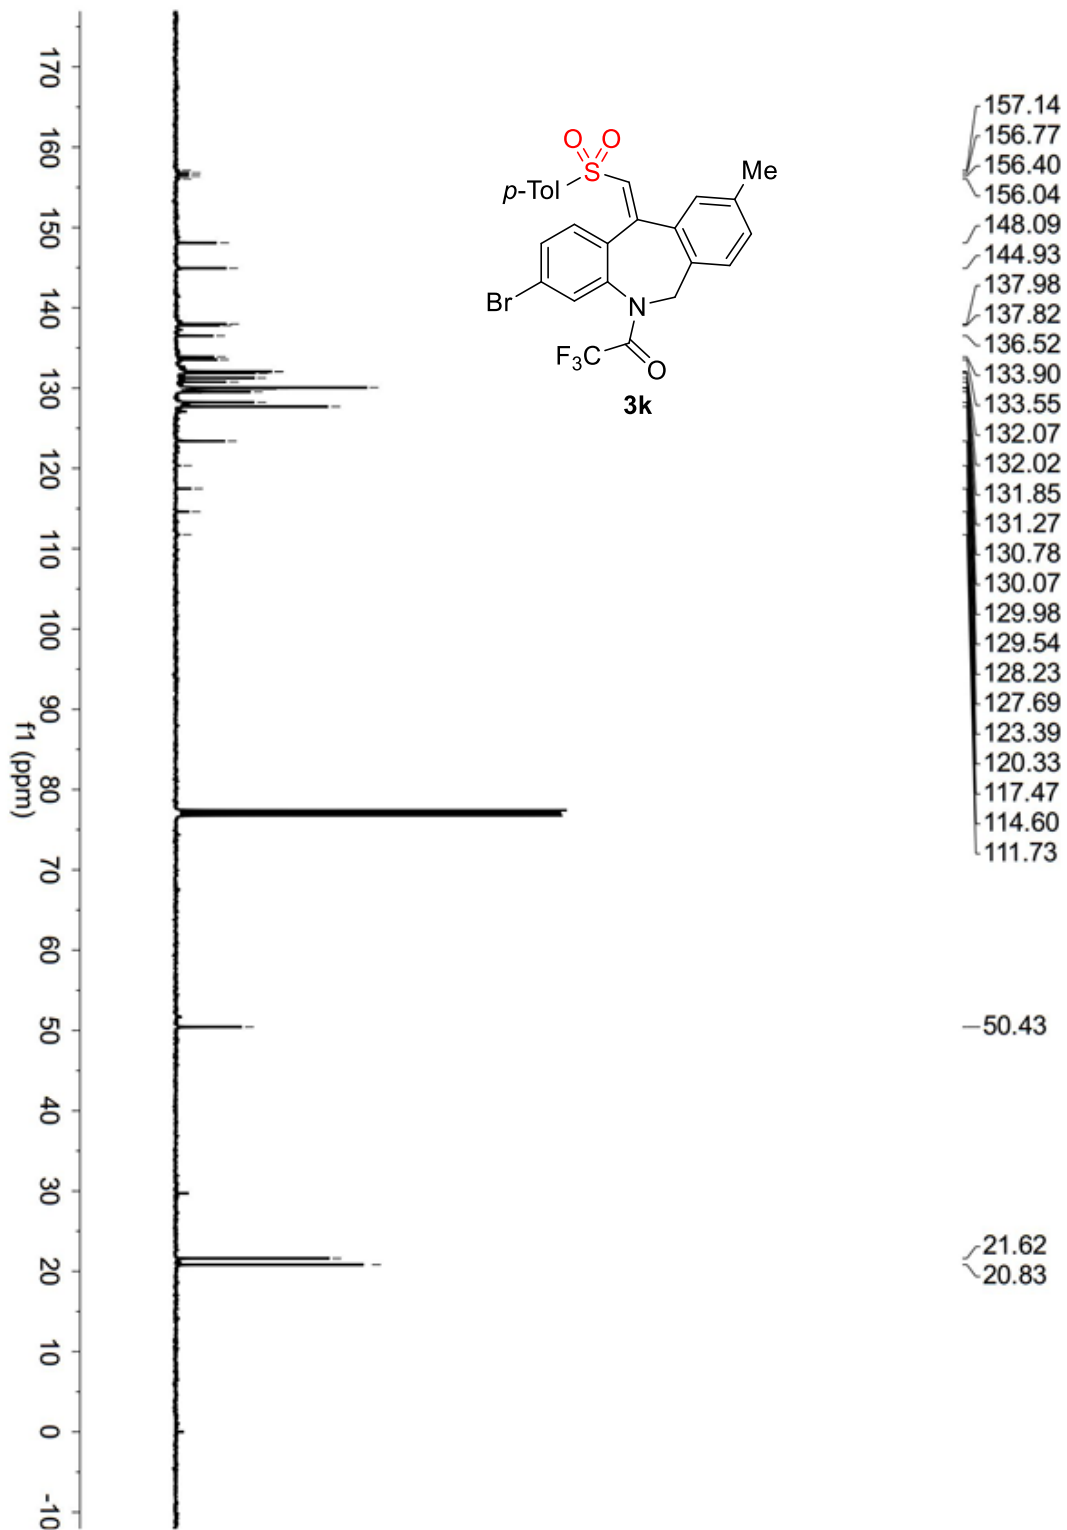

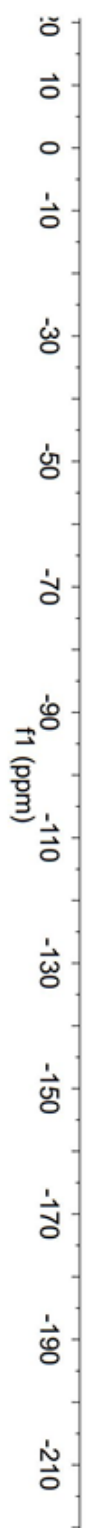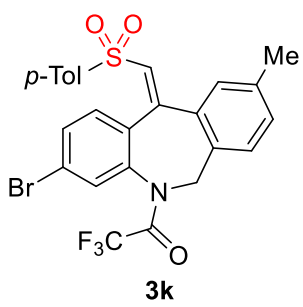

-67.04

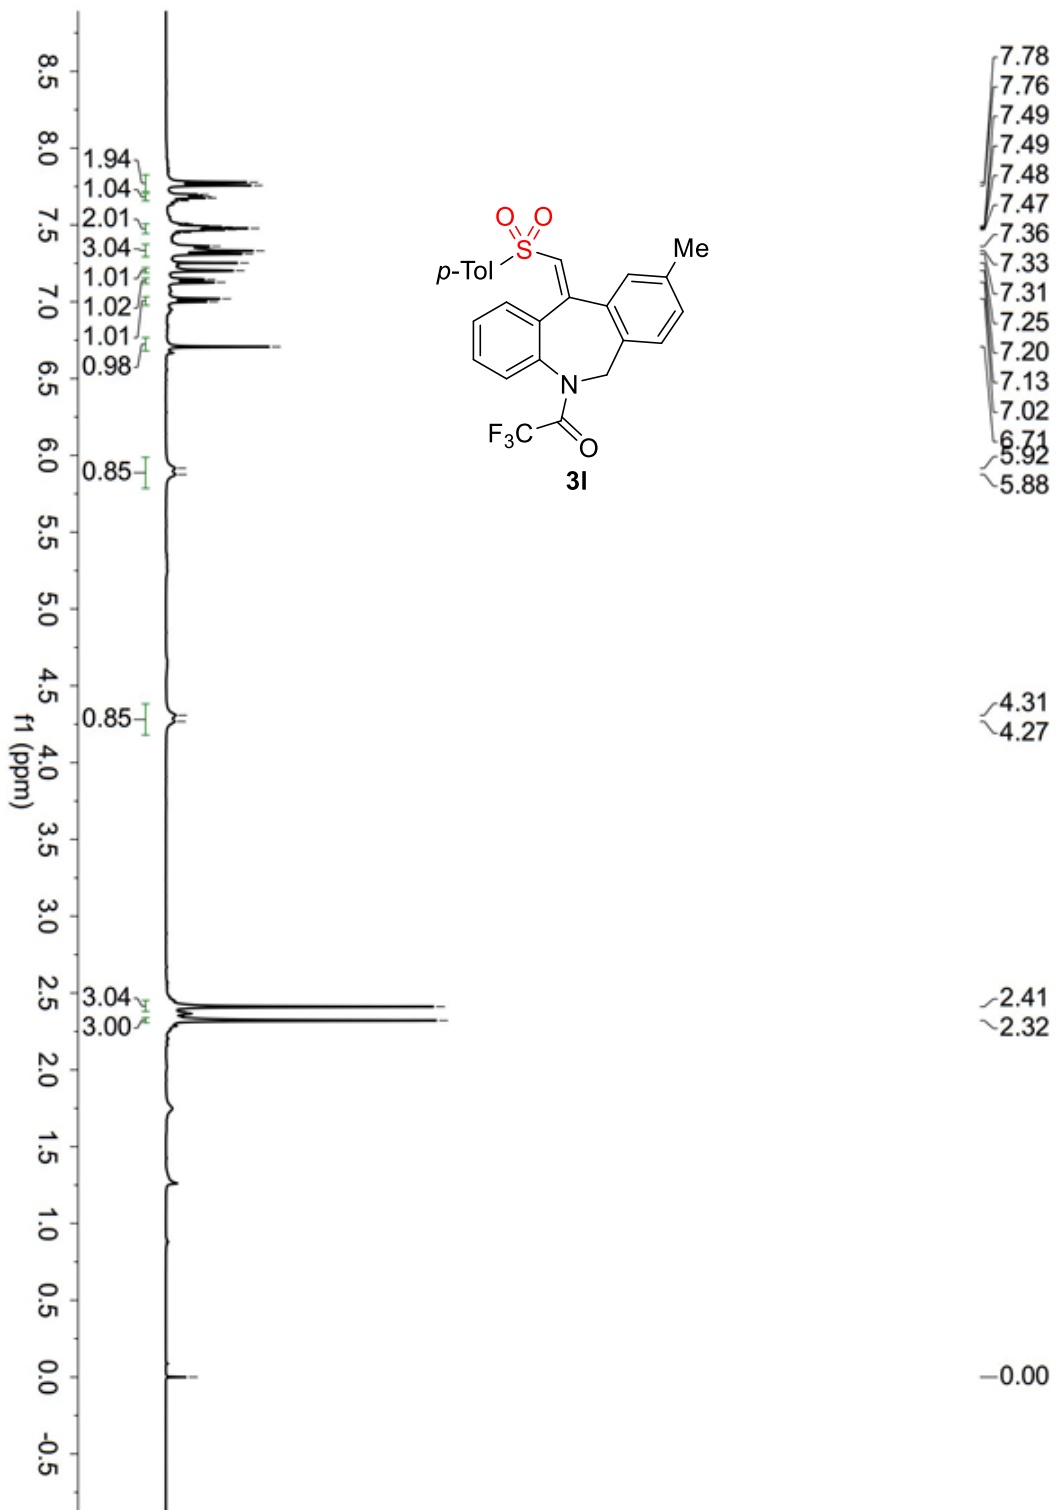



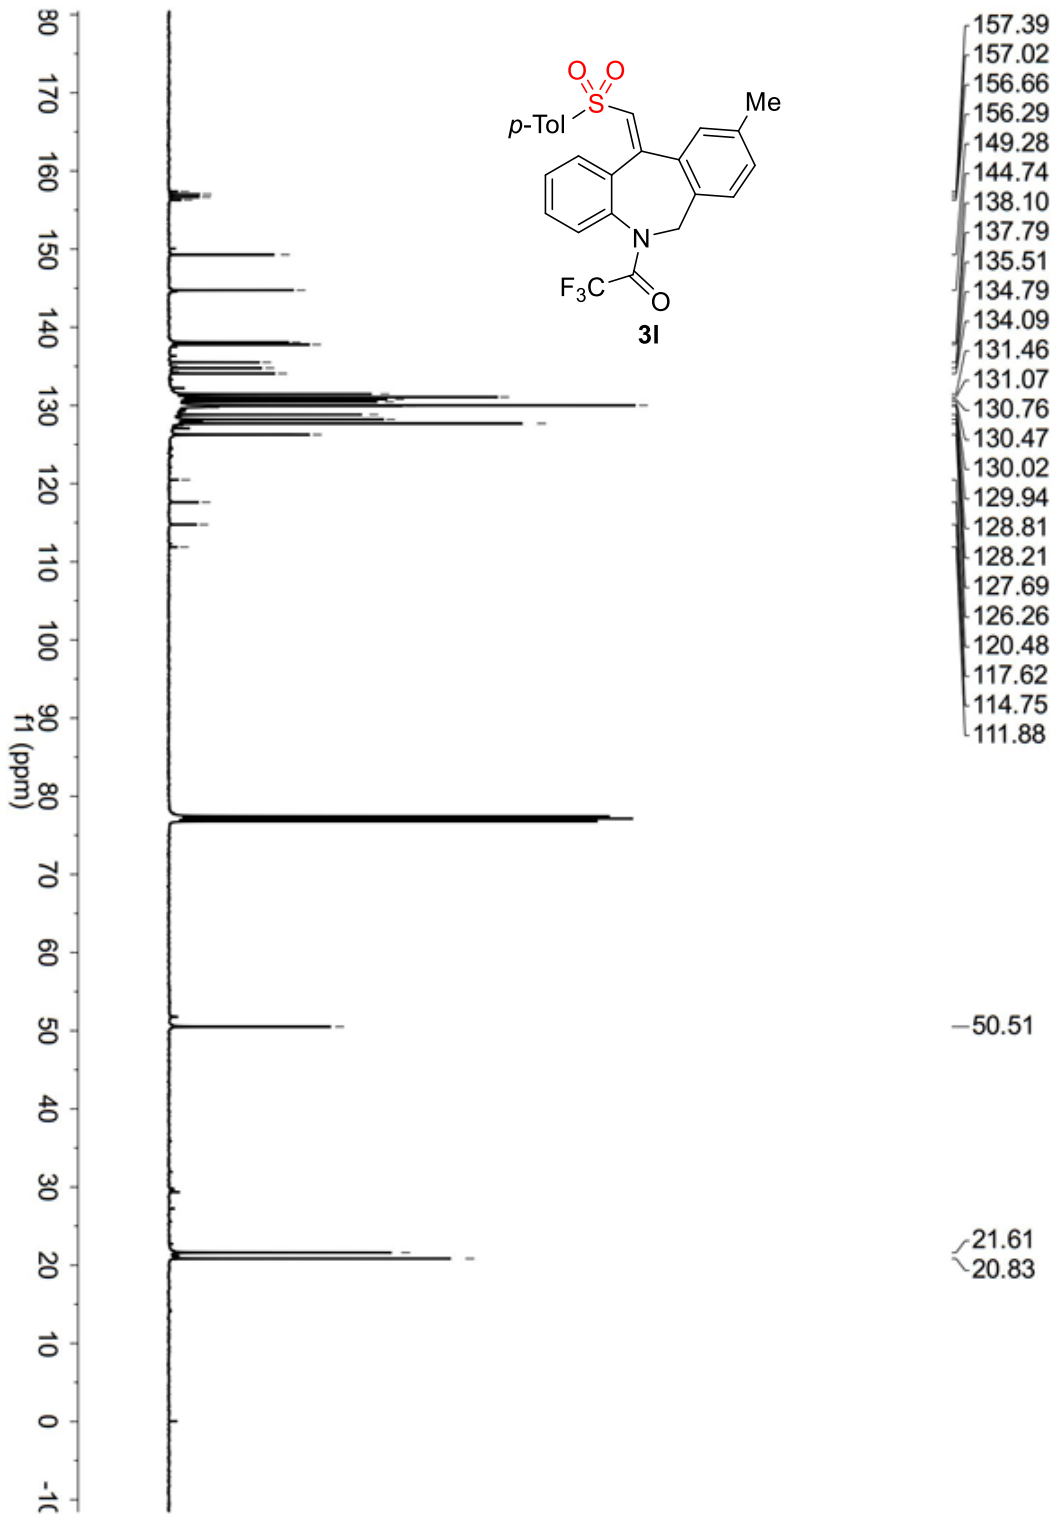

20  
10  
0  
-10  
-30  
-50  
-70  
-90  
-110  
-130  
-150  
-170  
-190  
-210

f1 (ppm)

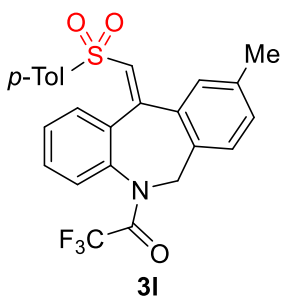

-66.96

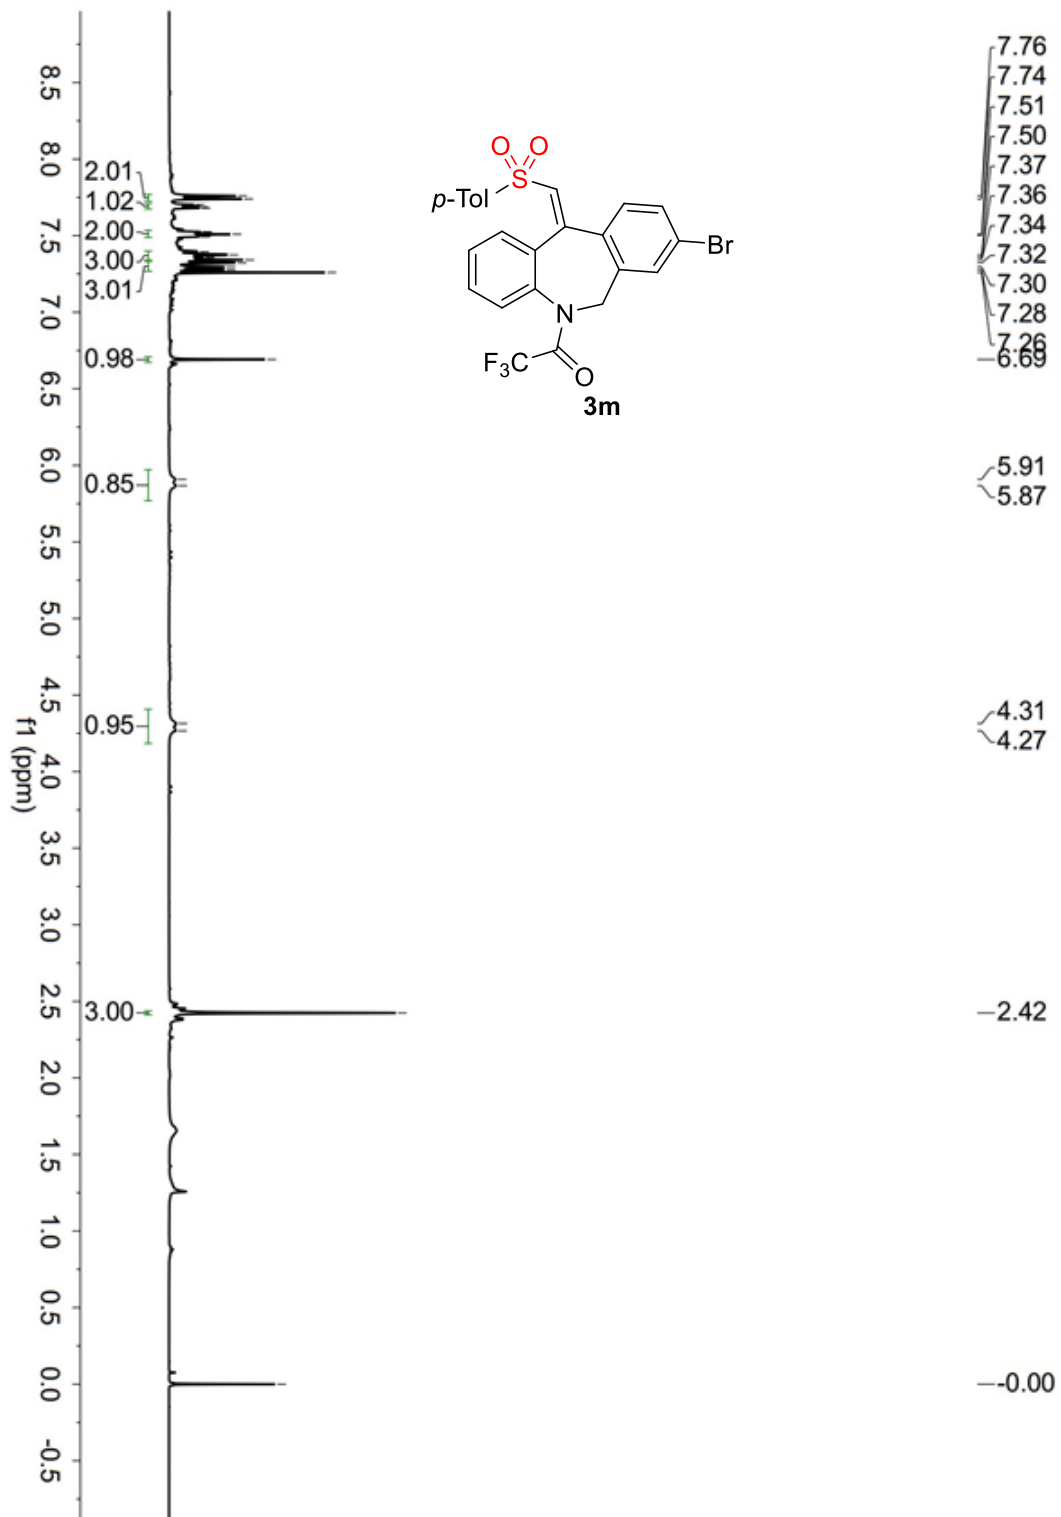

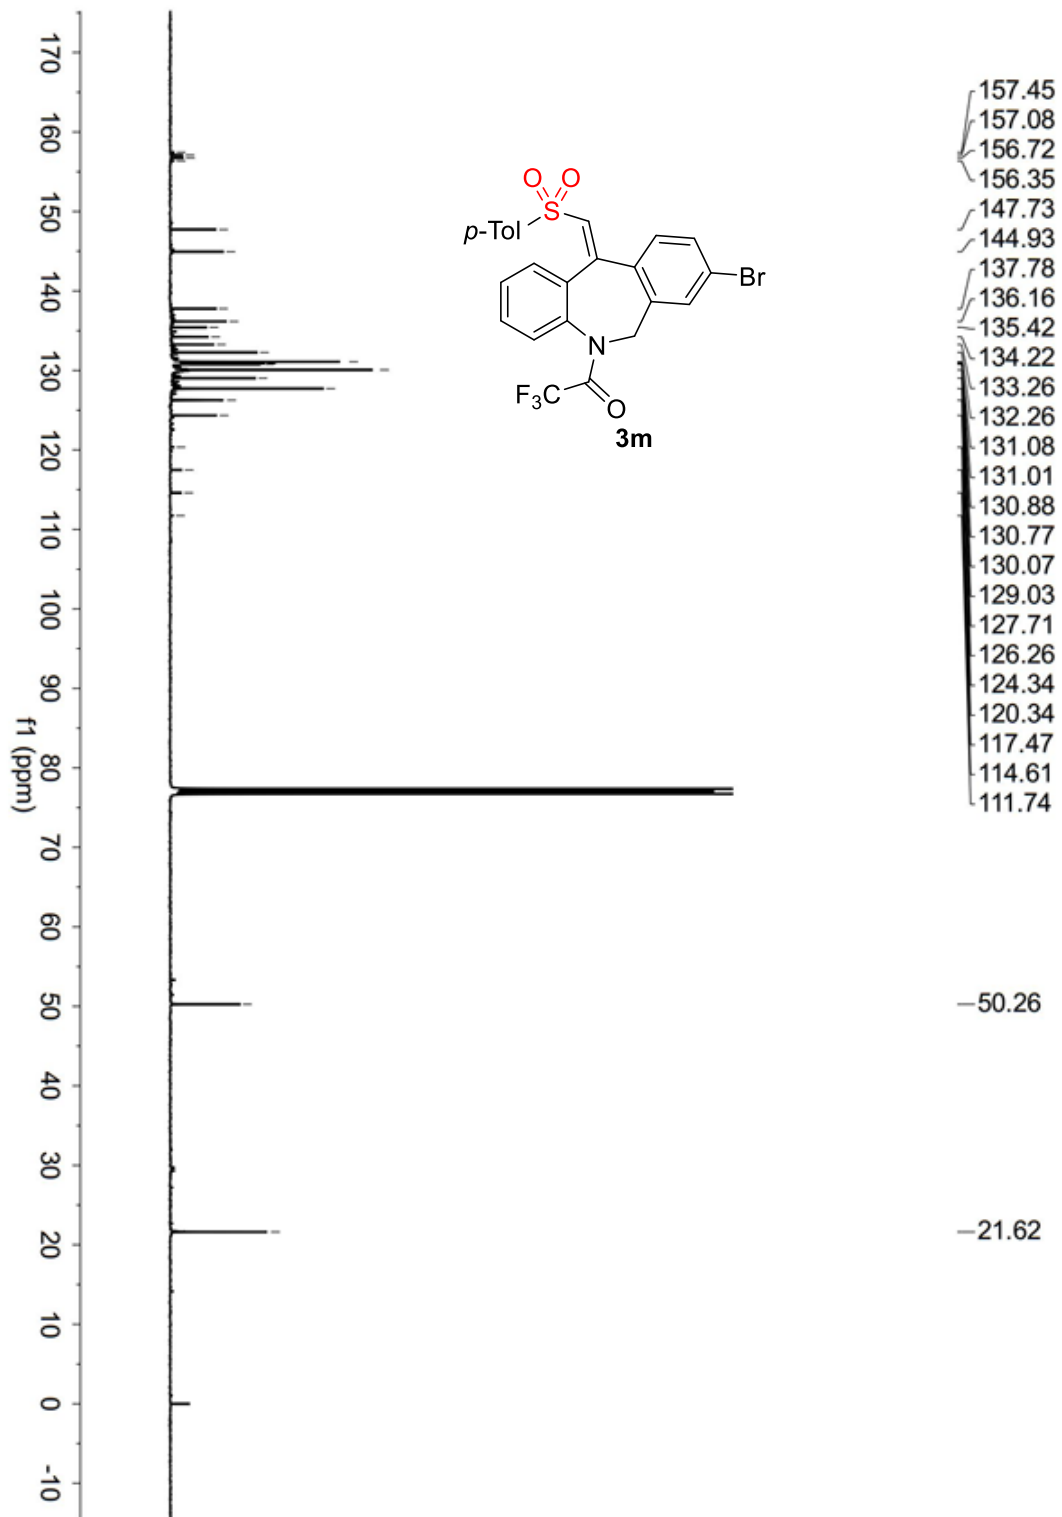

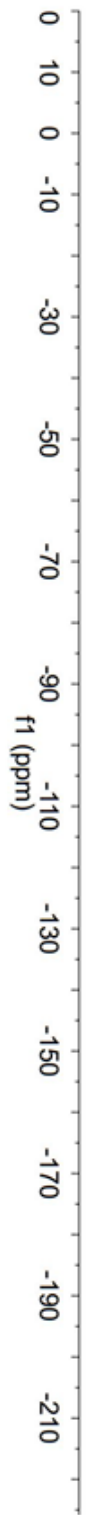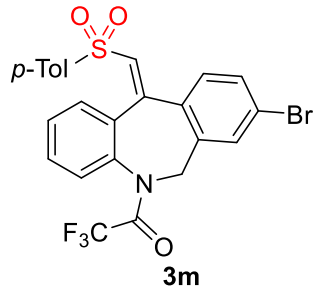

--67.07

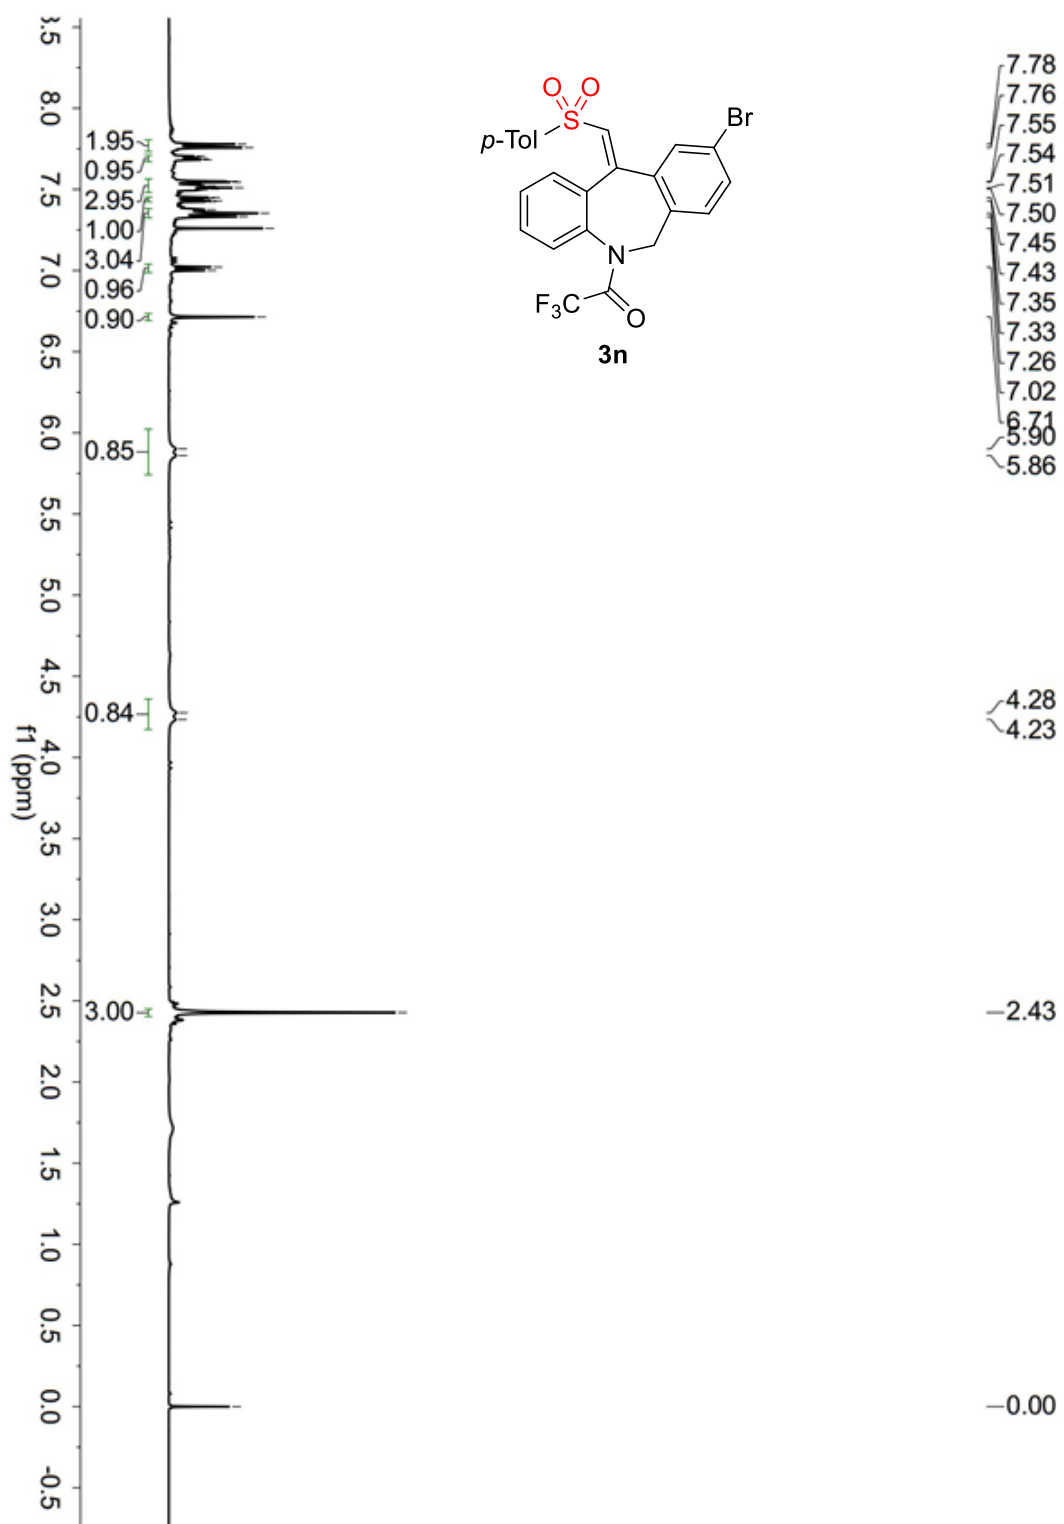

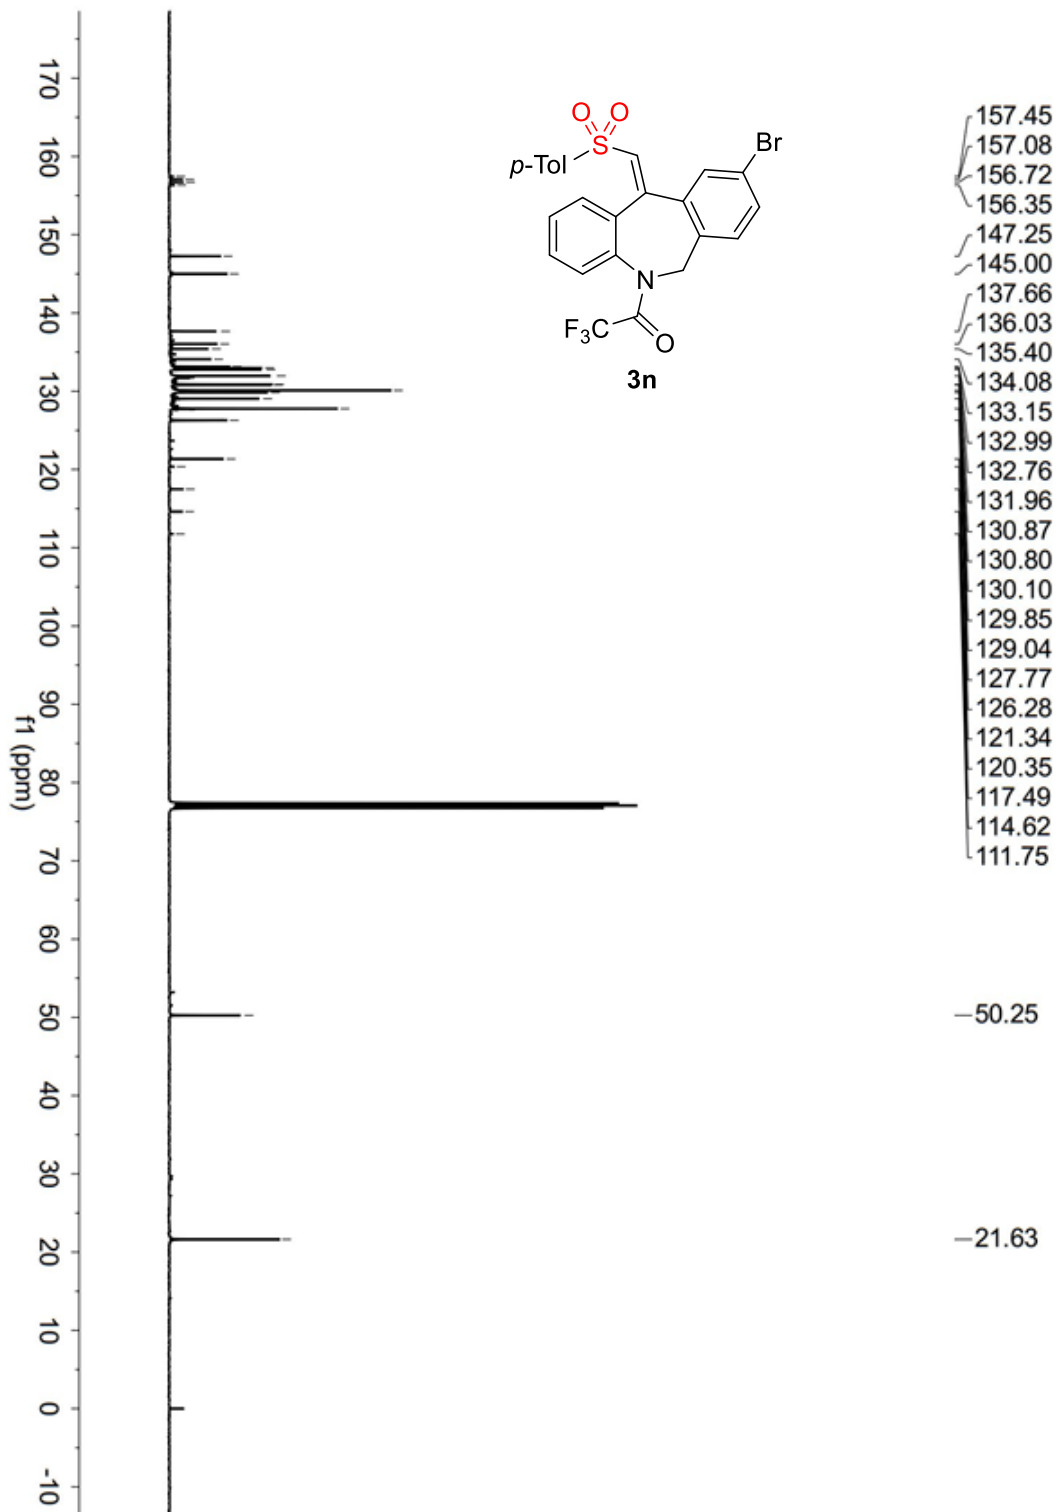

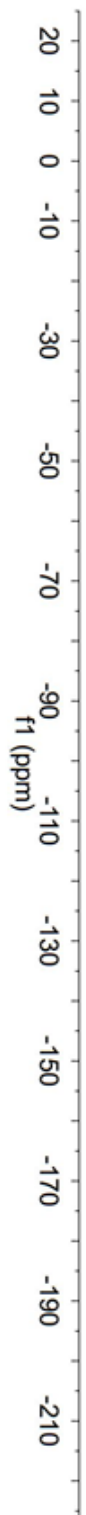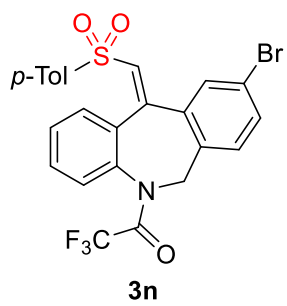

—67.02



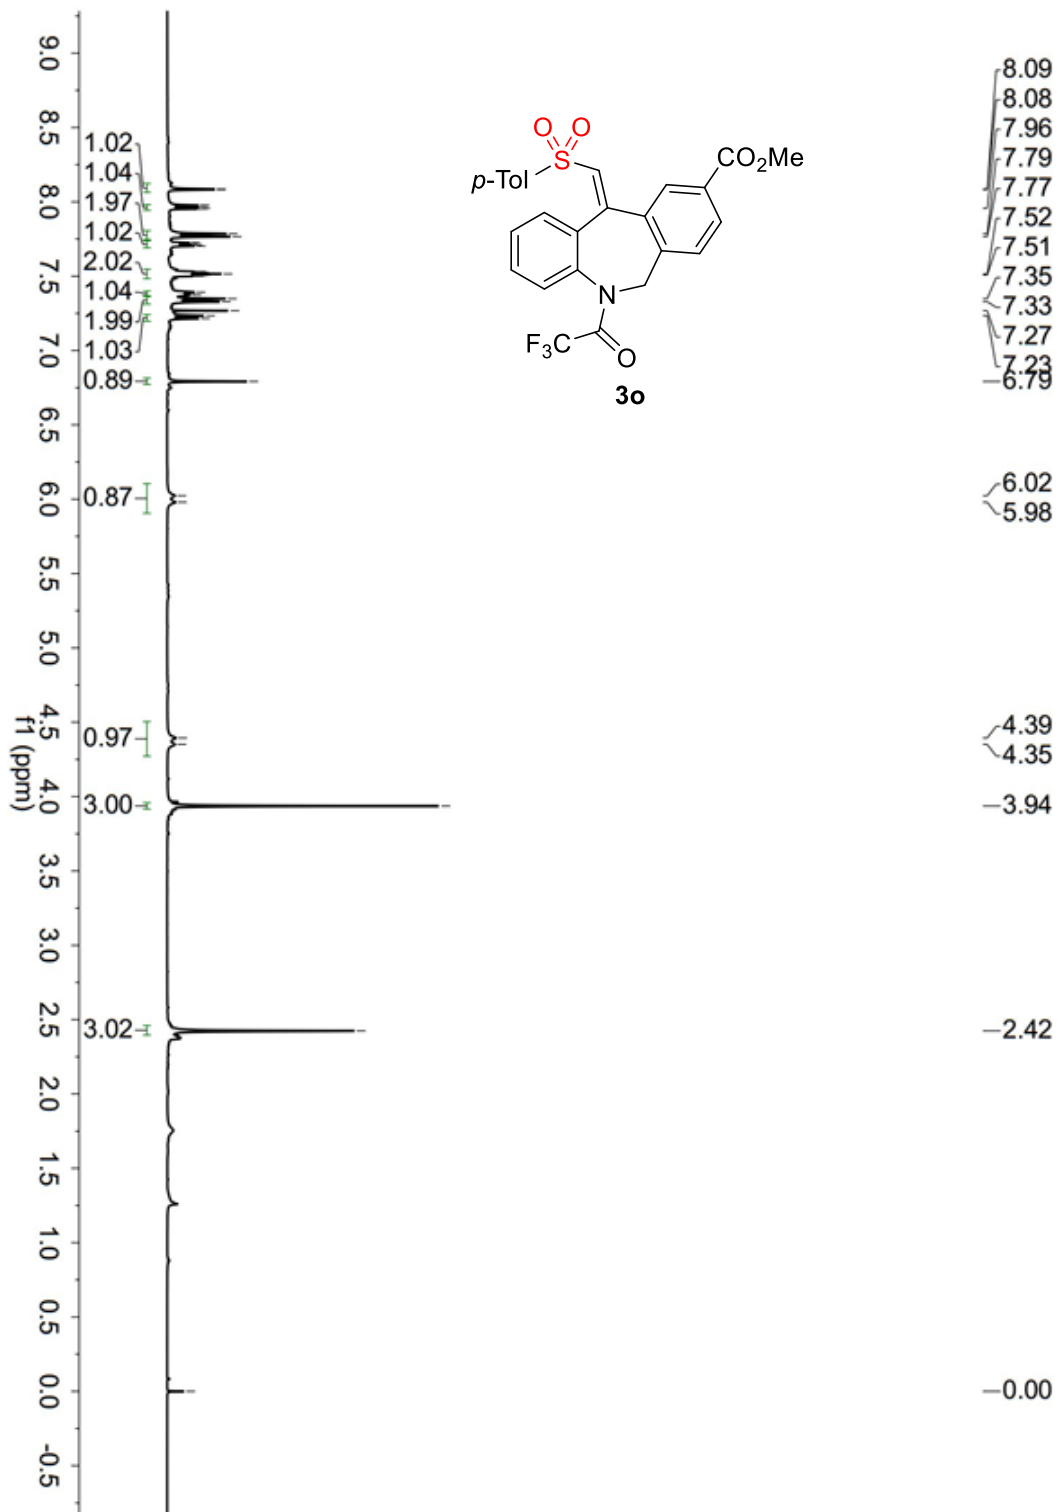

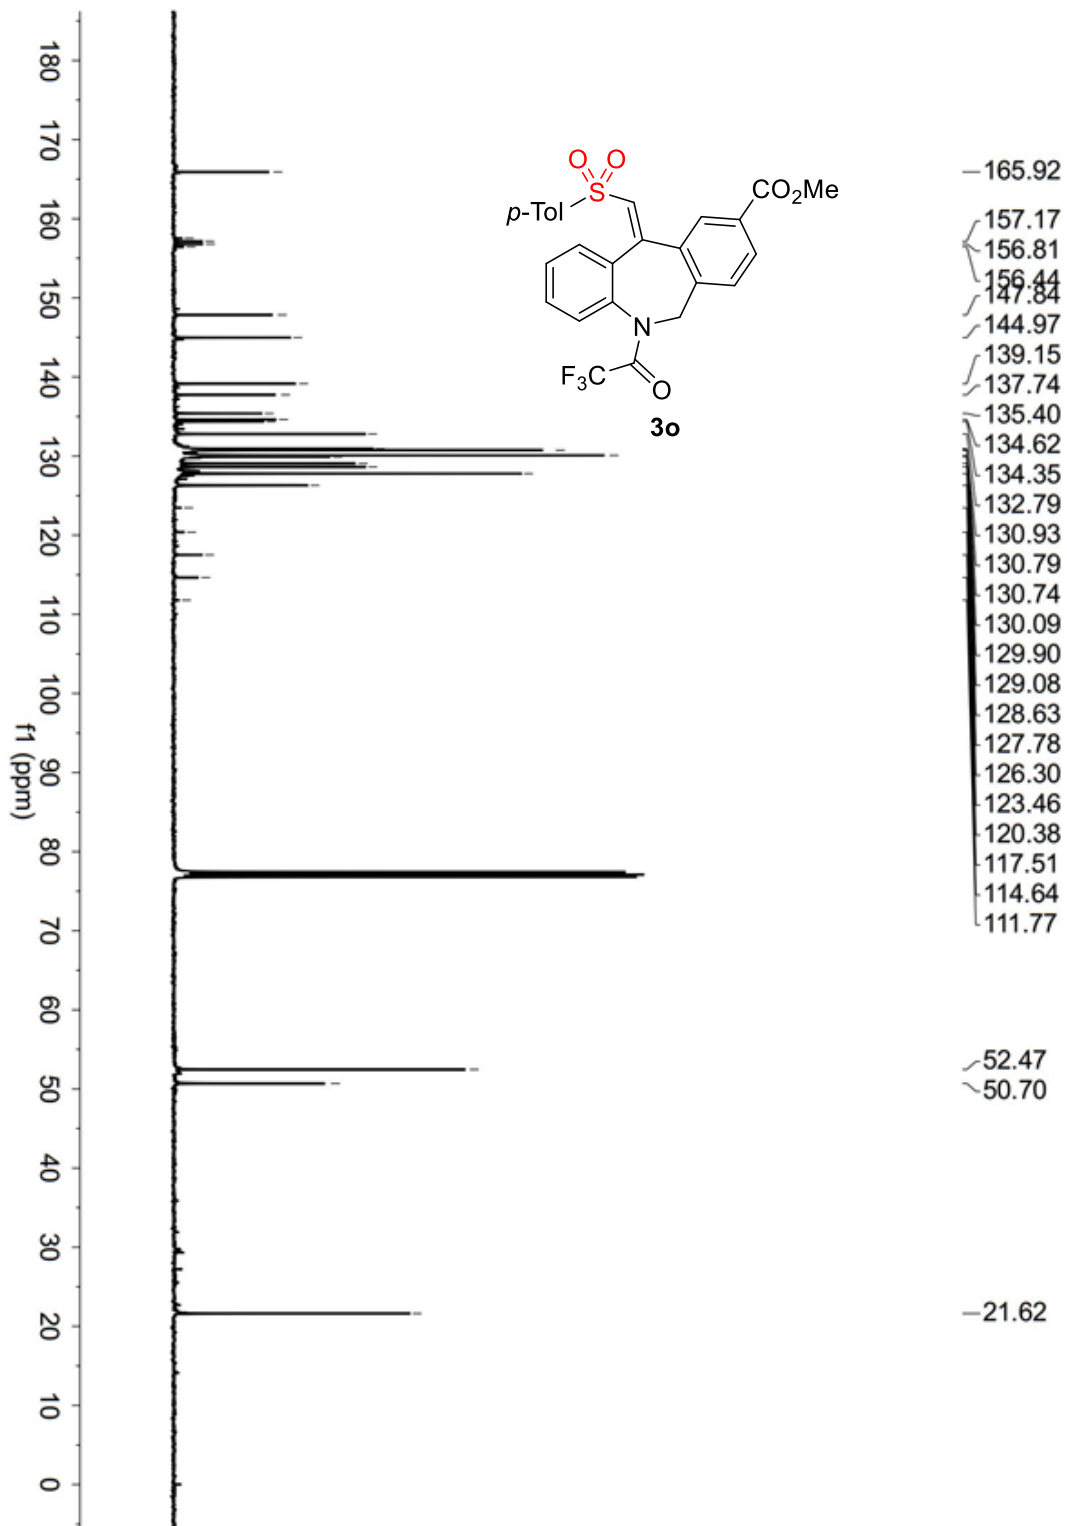

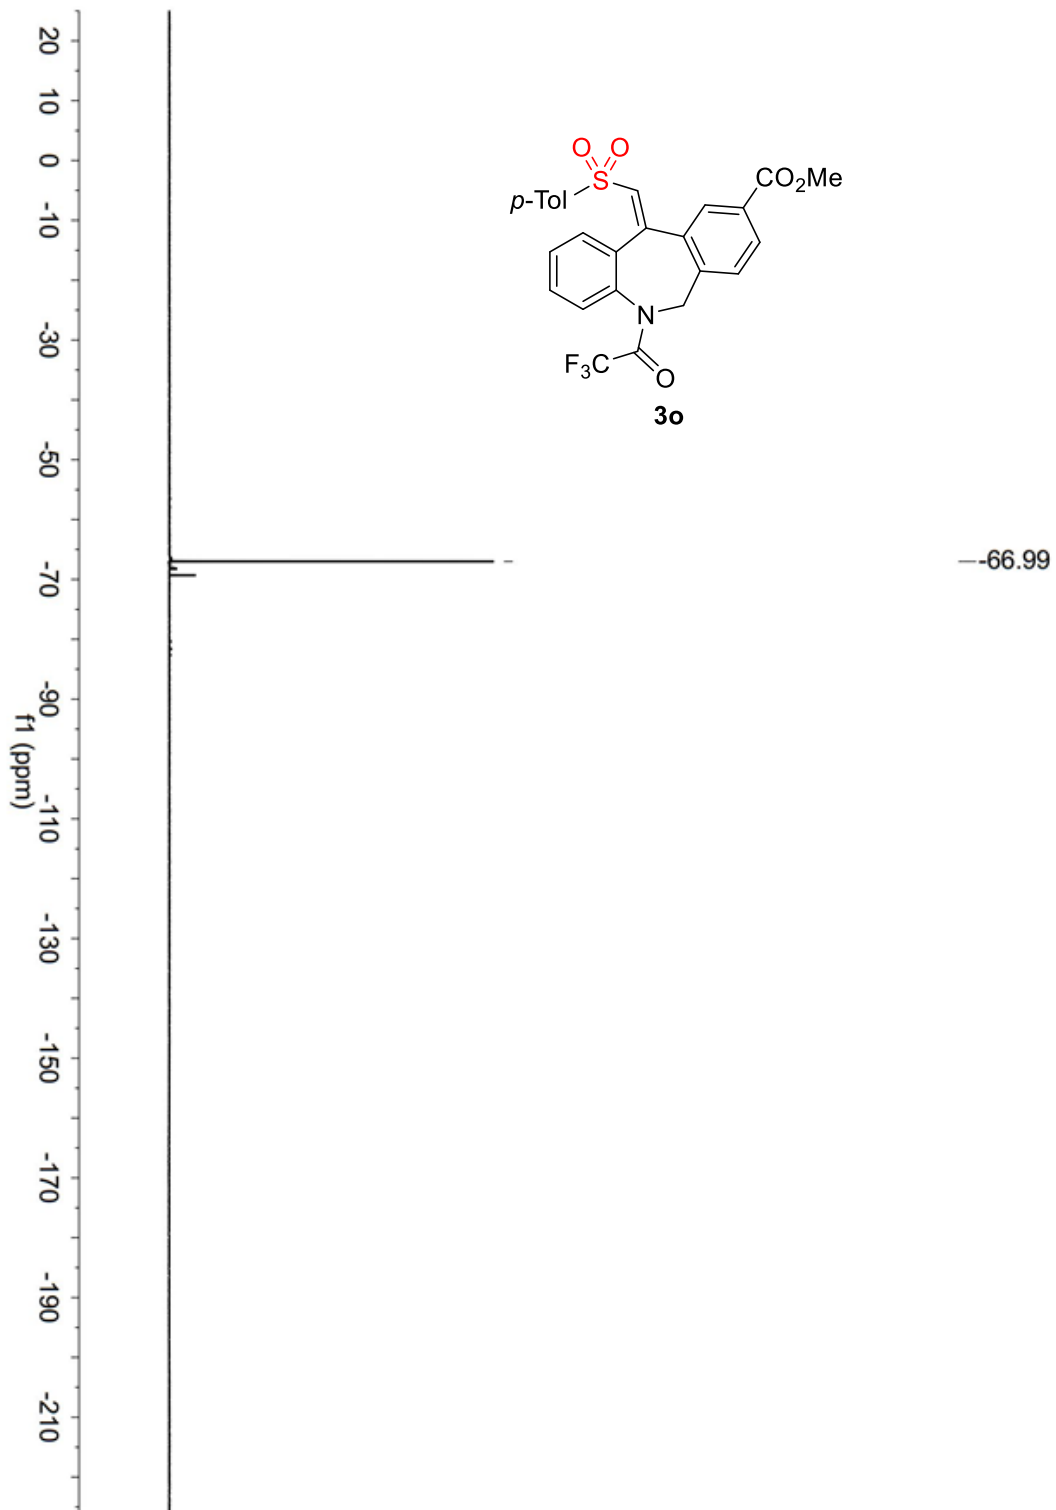

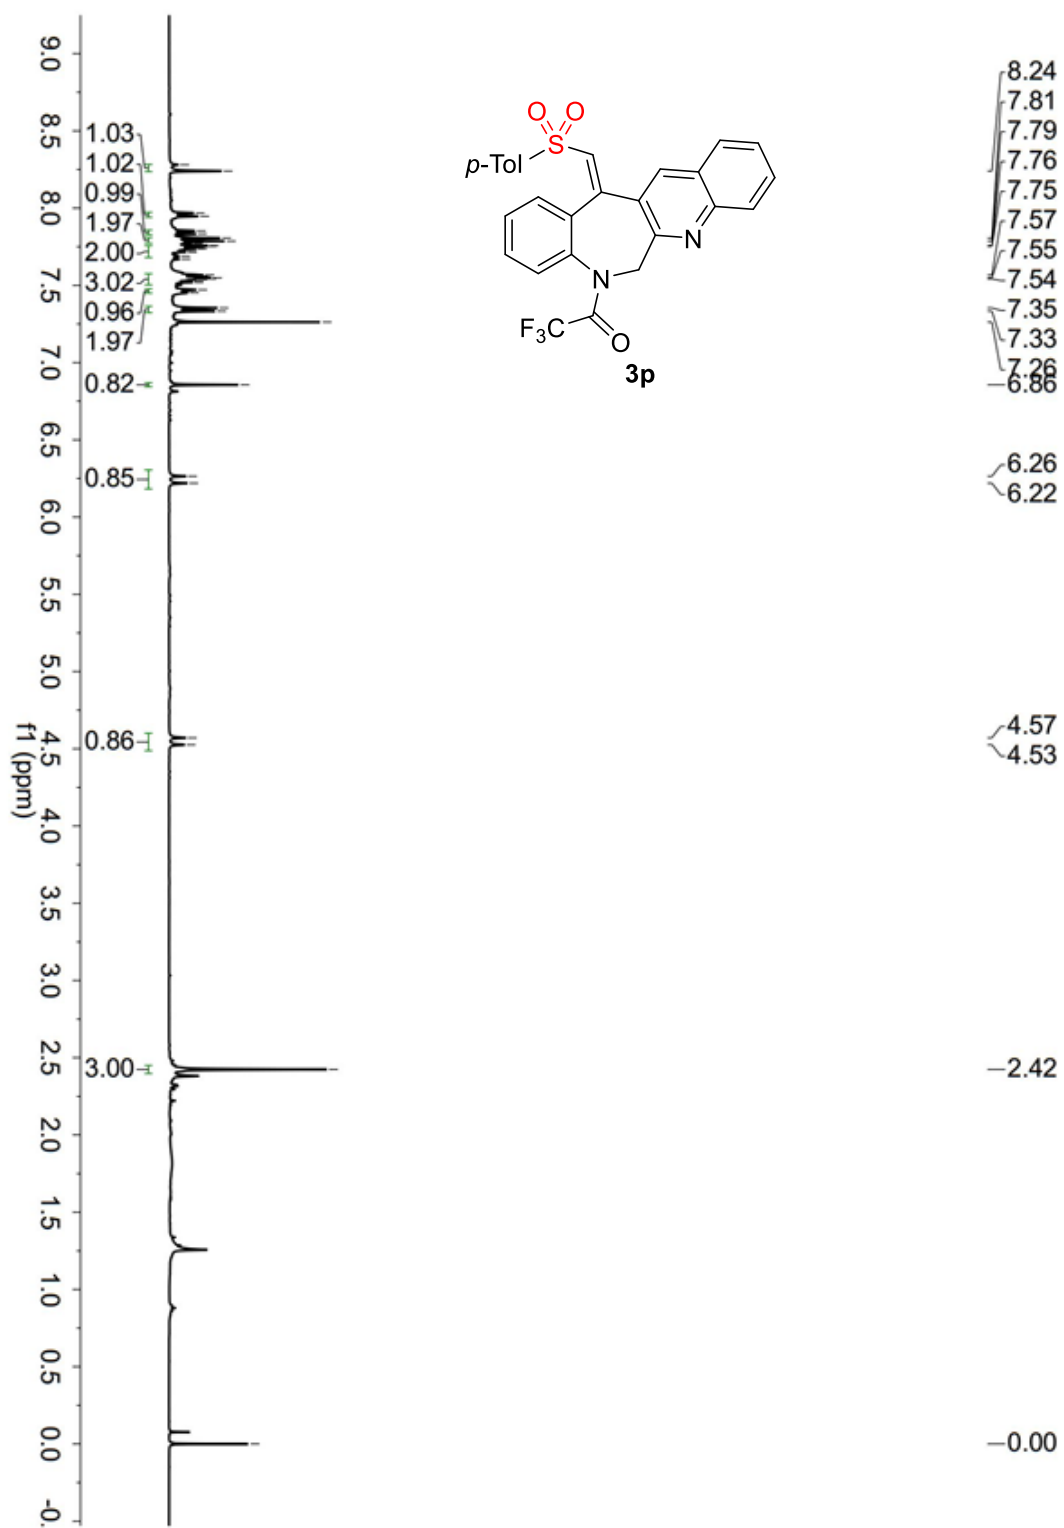

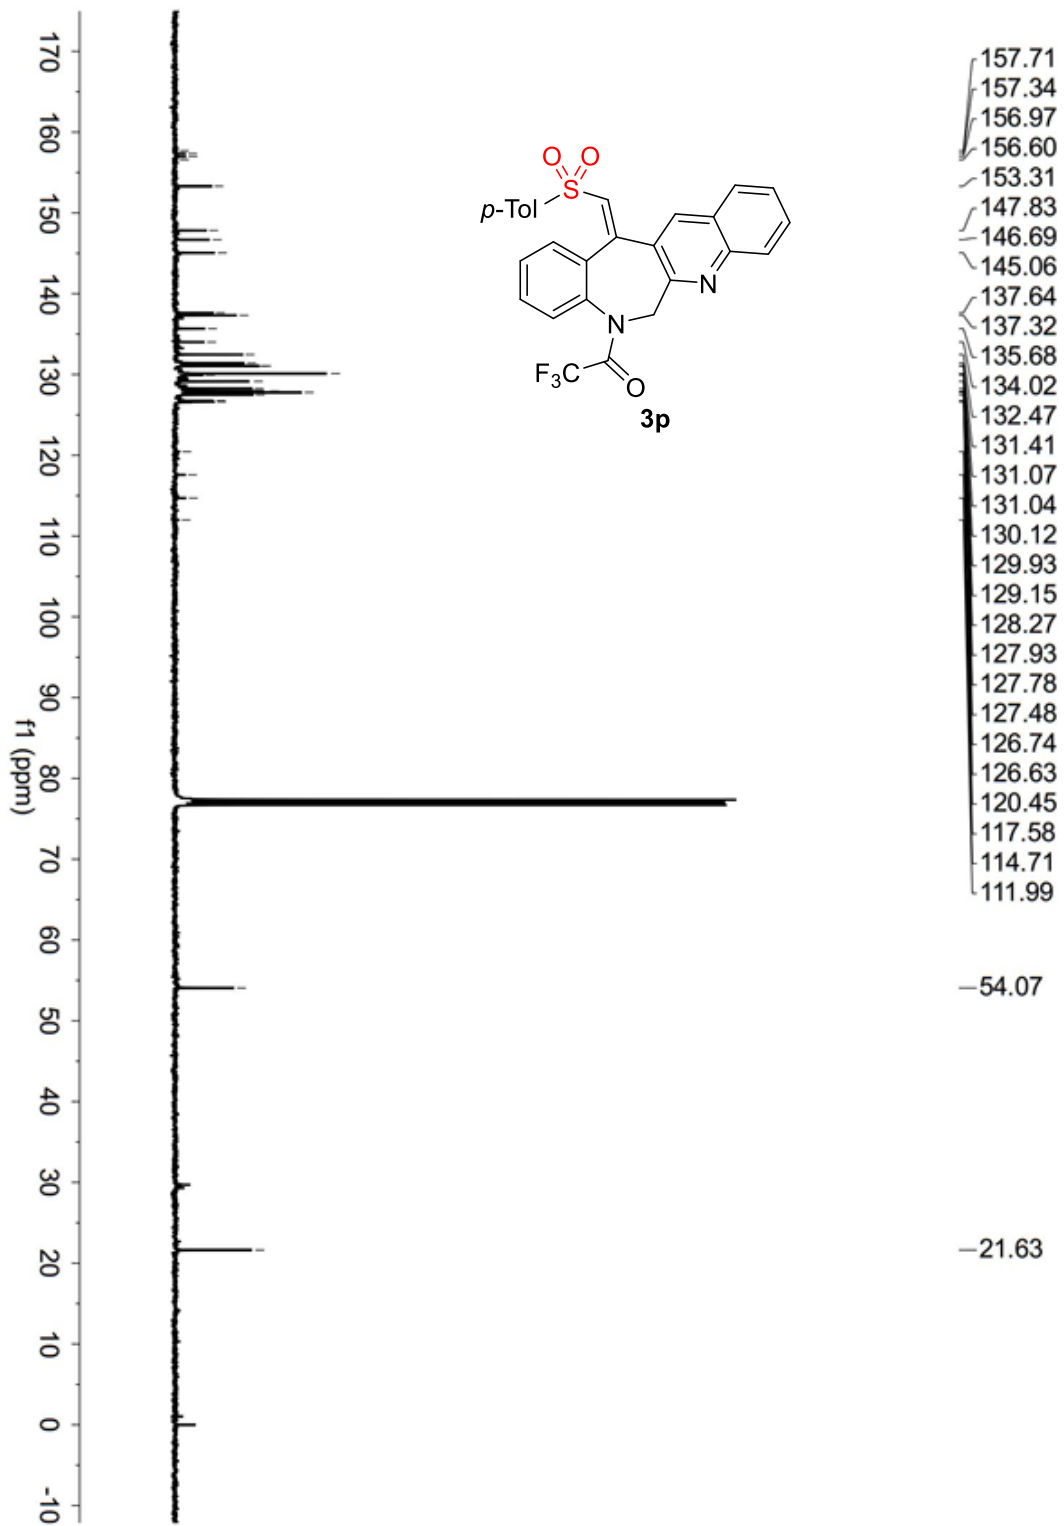

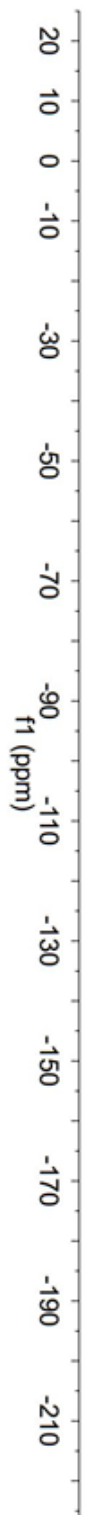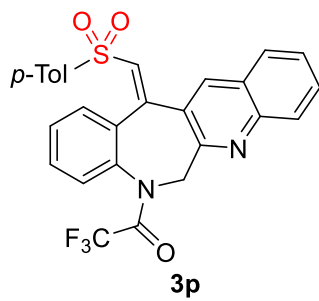

--67.05

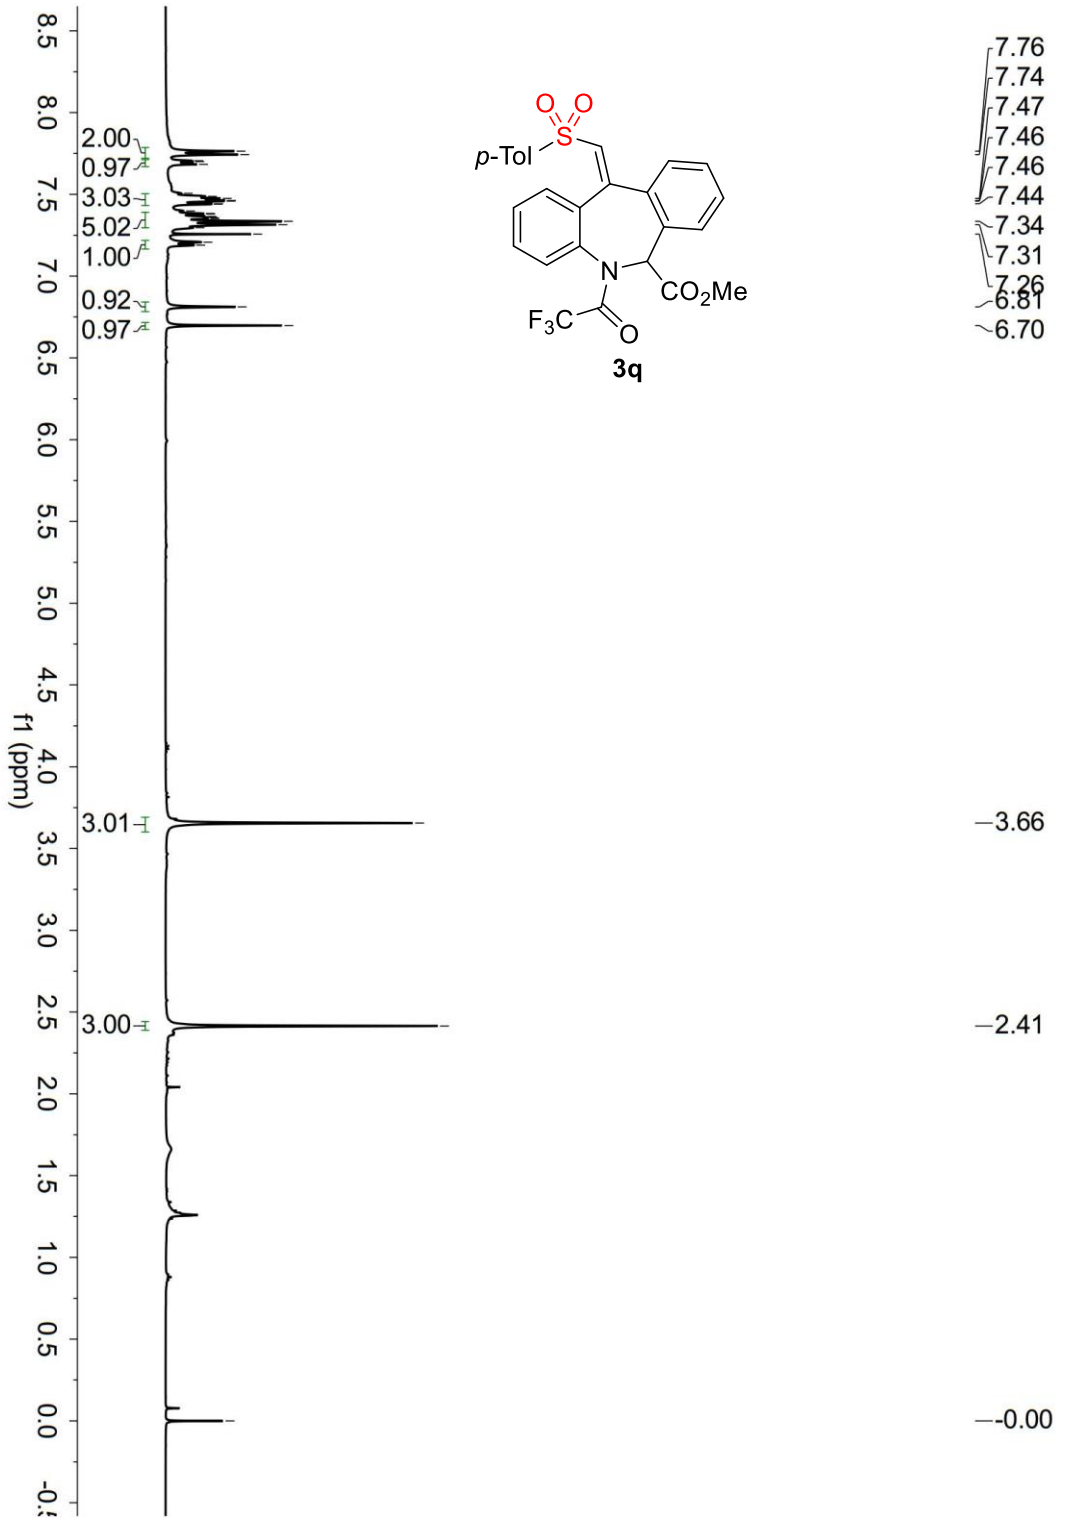

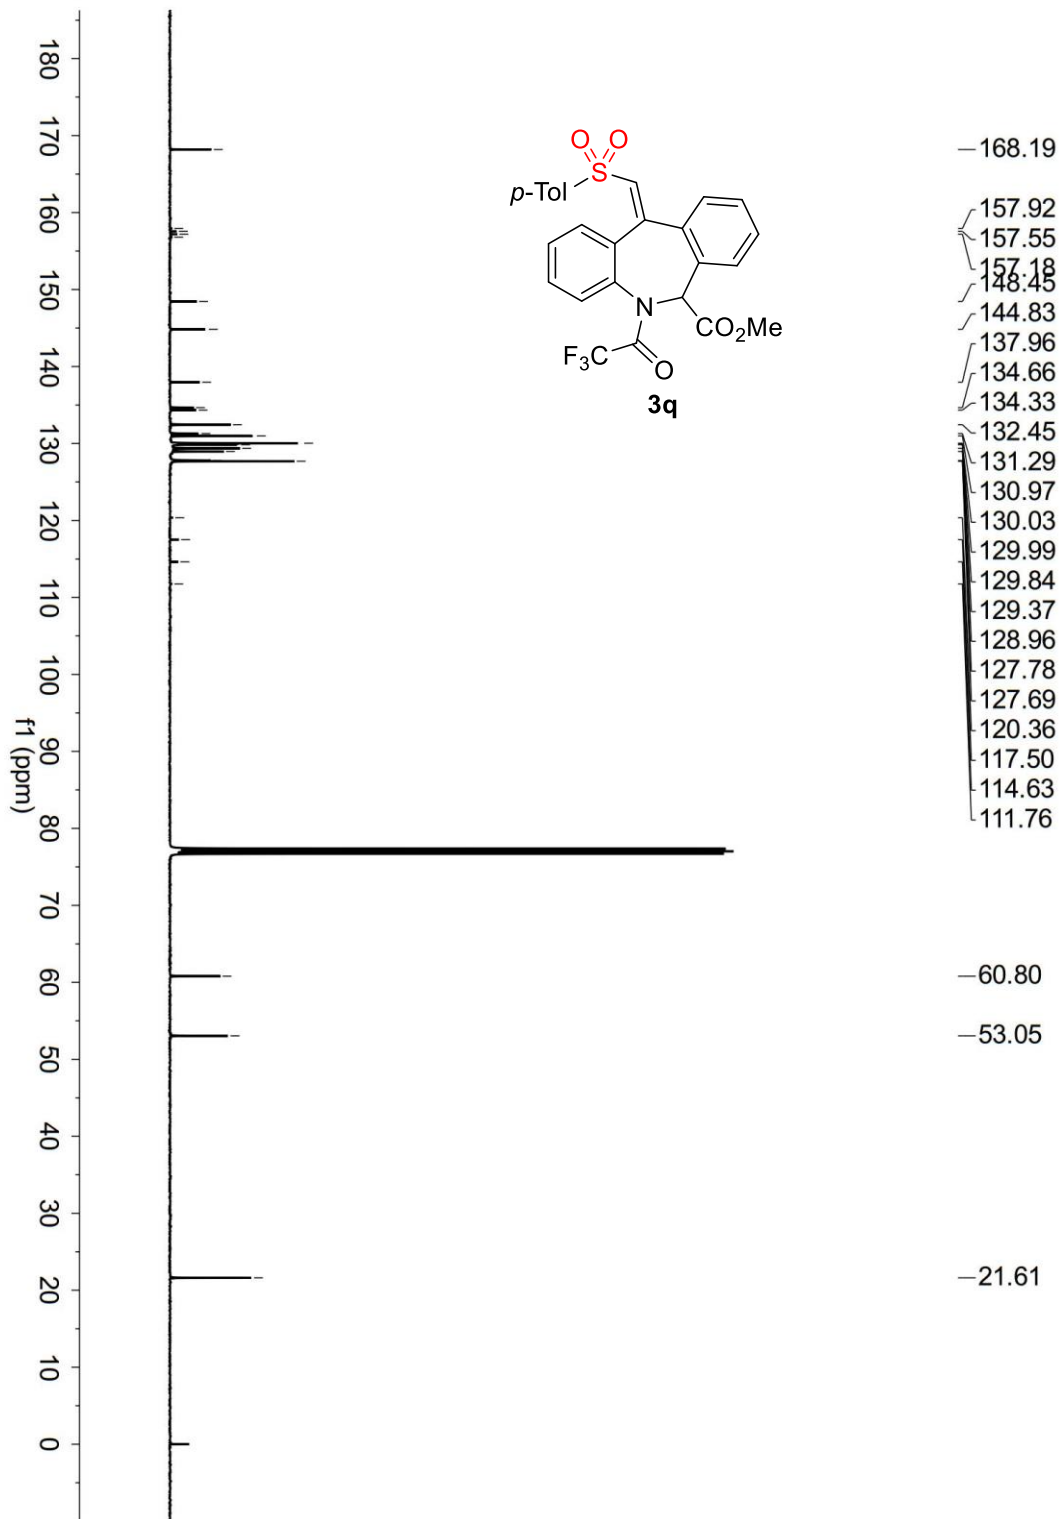



20  
10  
0  
-10  
-30  
-50  
-70  
-90  
-110  
-130  
-150  
-170  
-190  
-210

f1 (ppm)

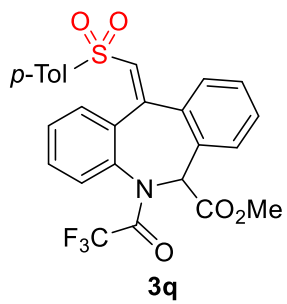

--66.54

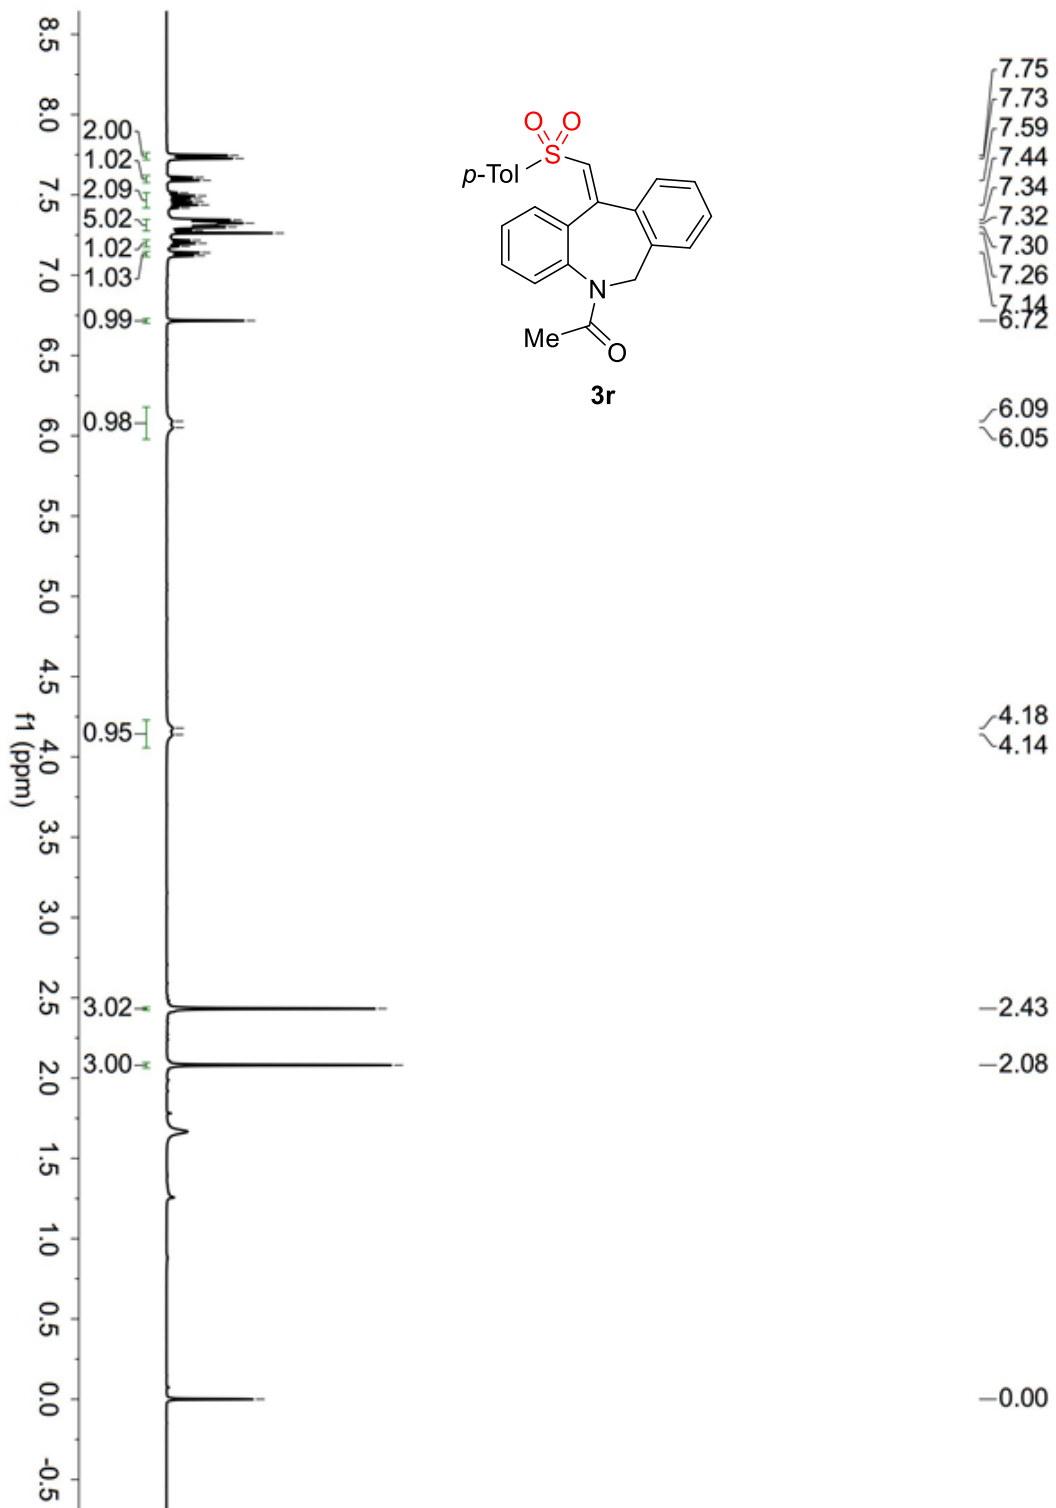

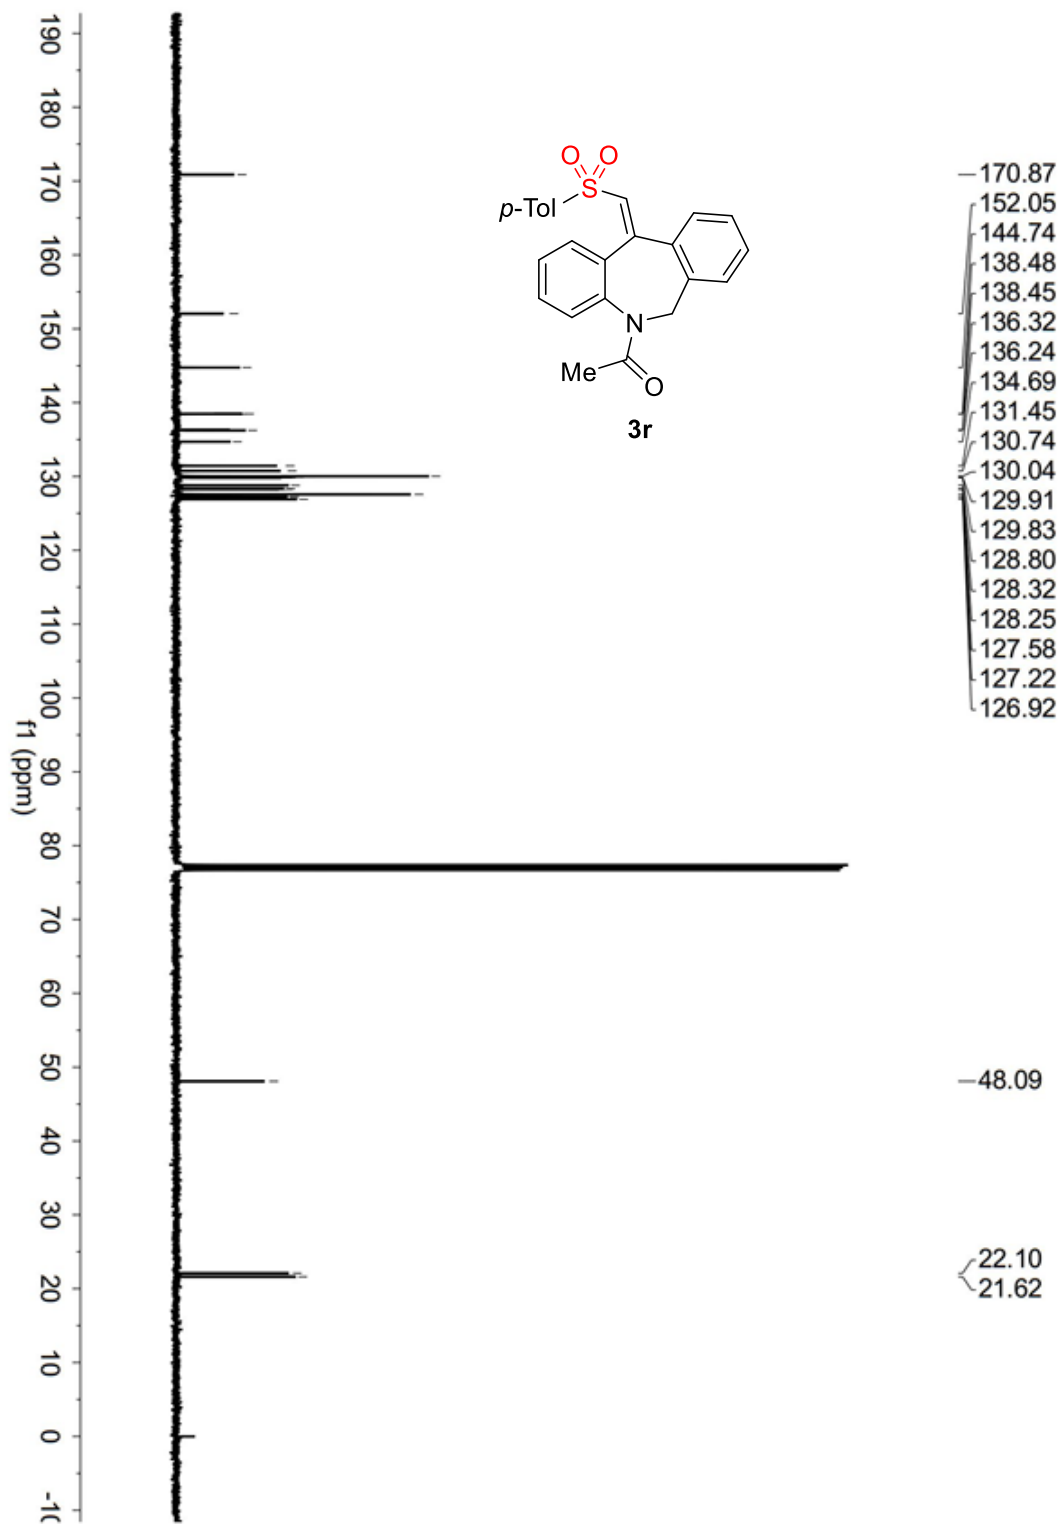

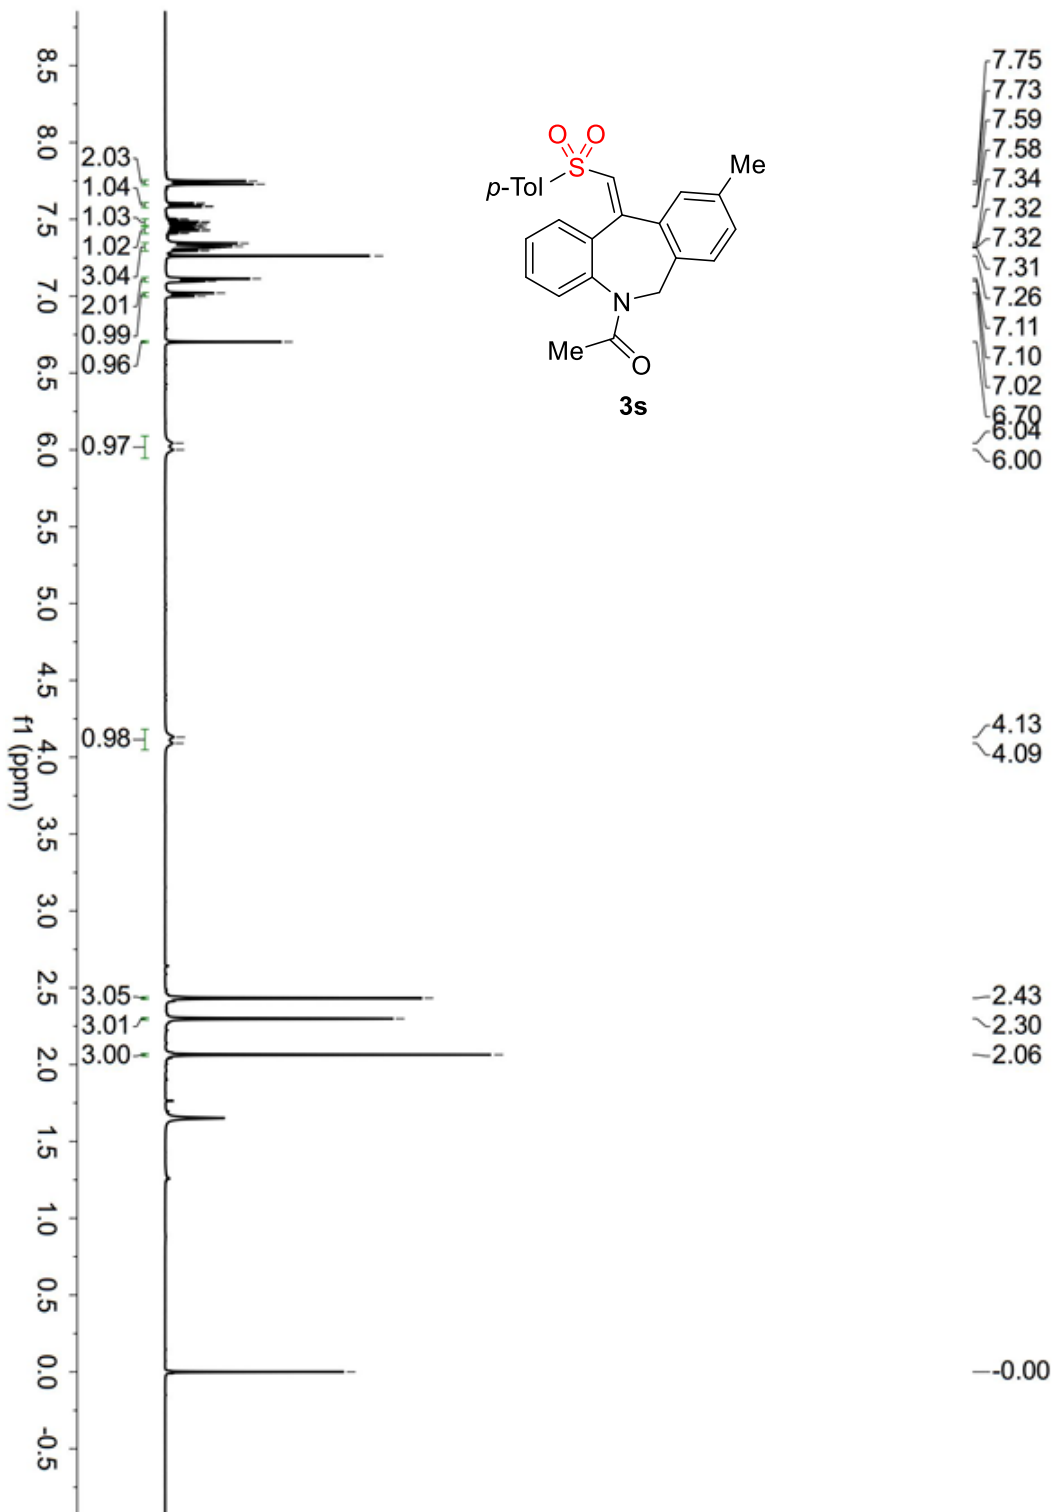

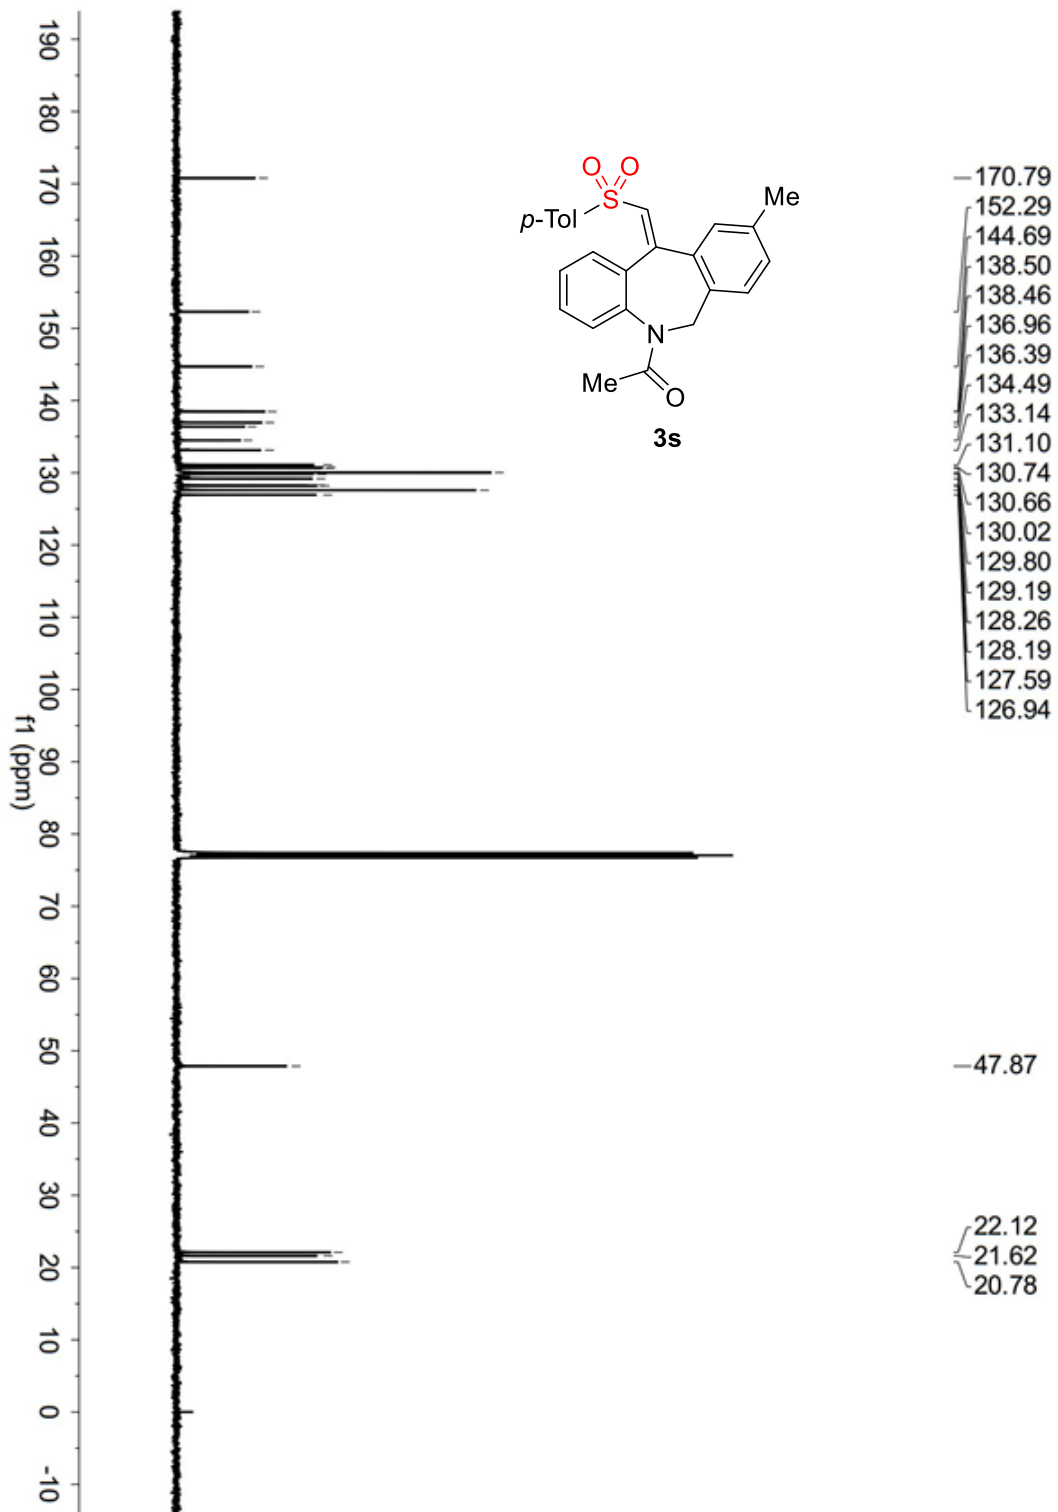

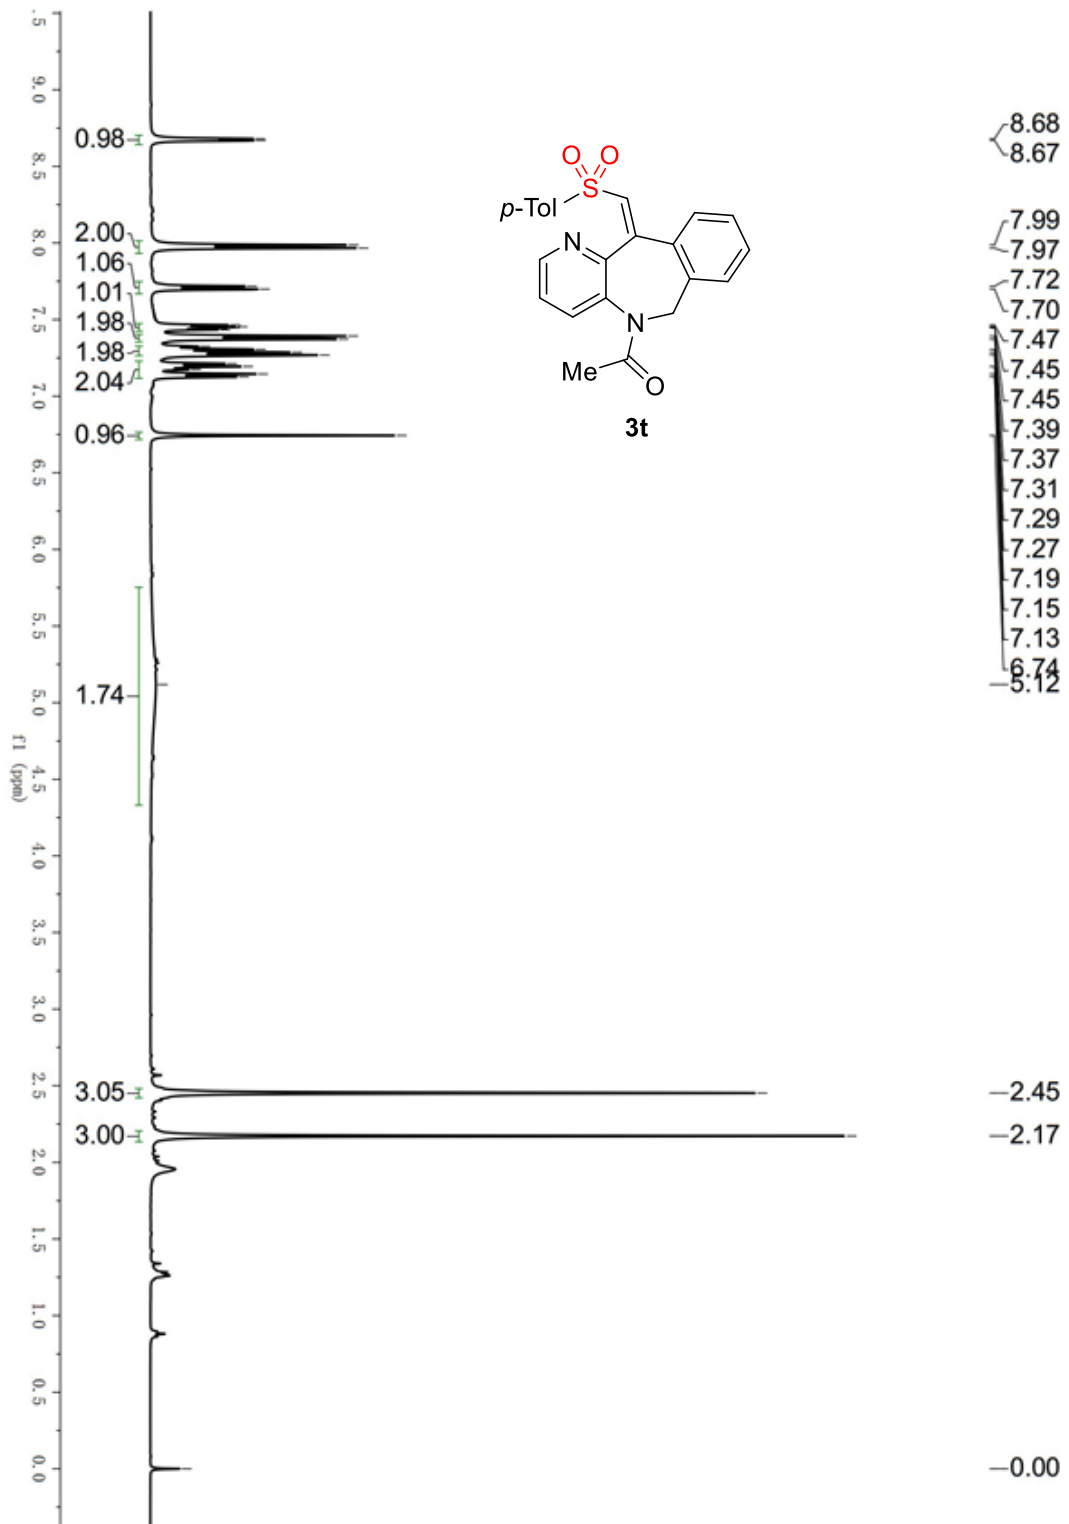

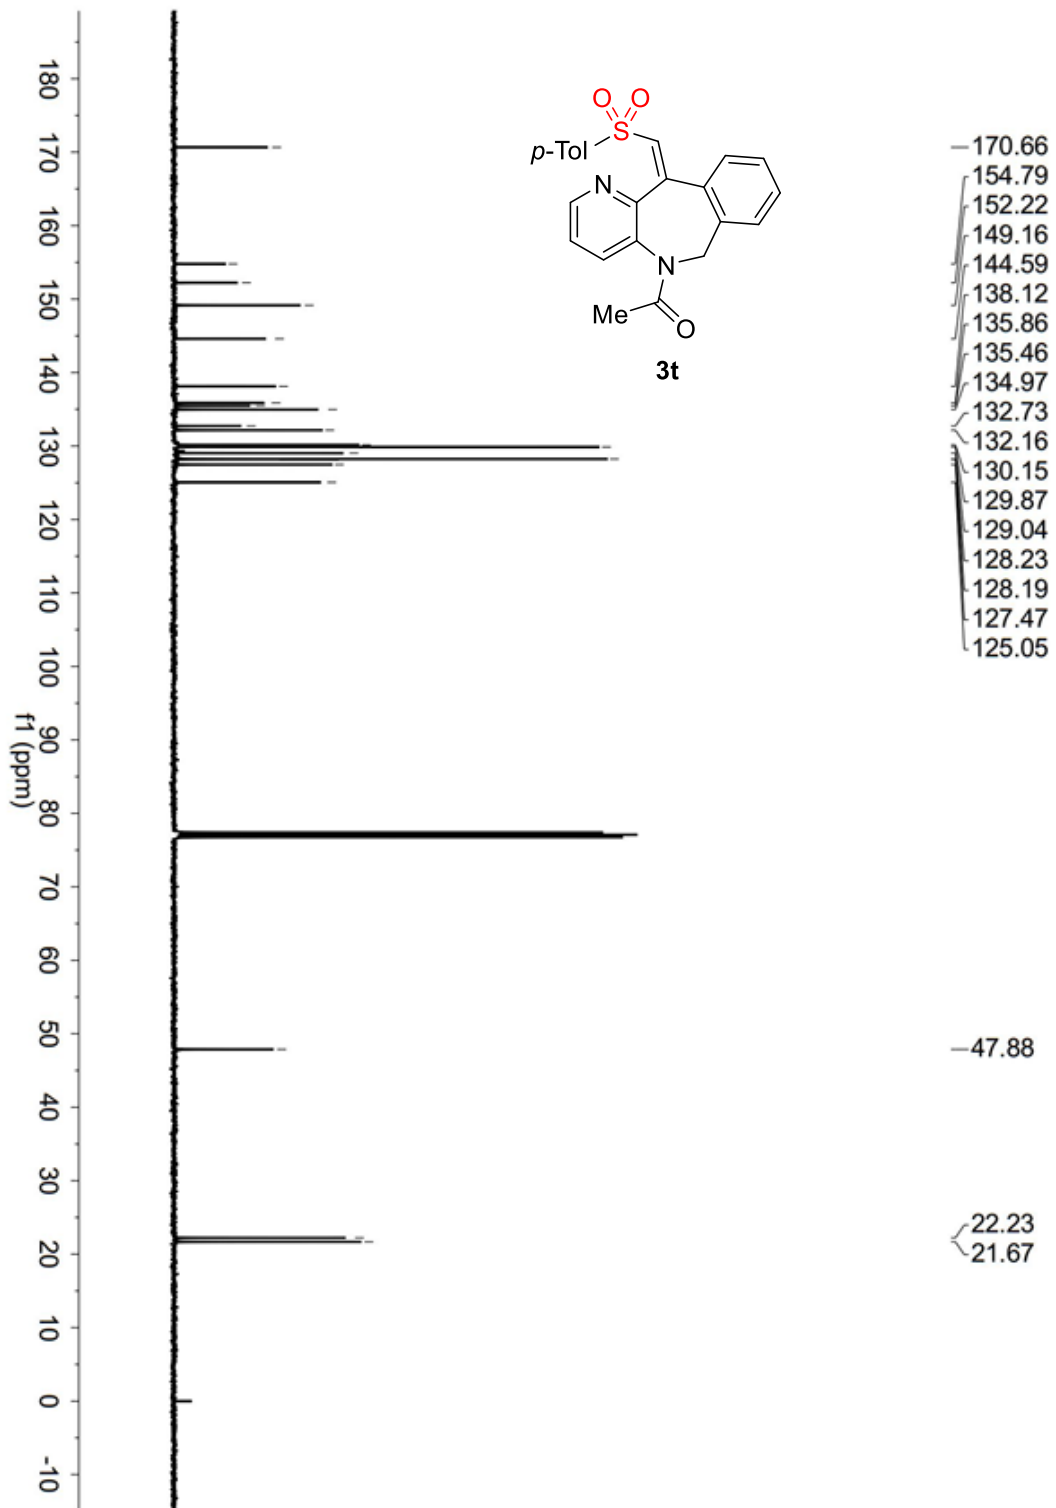

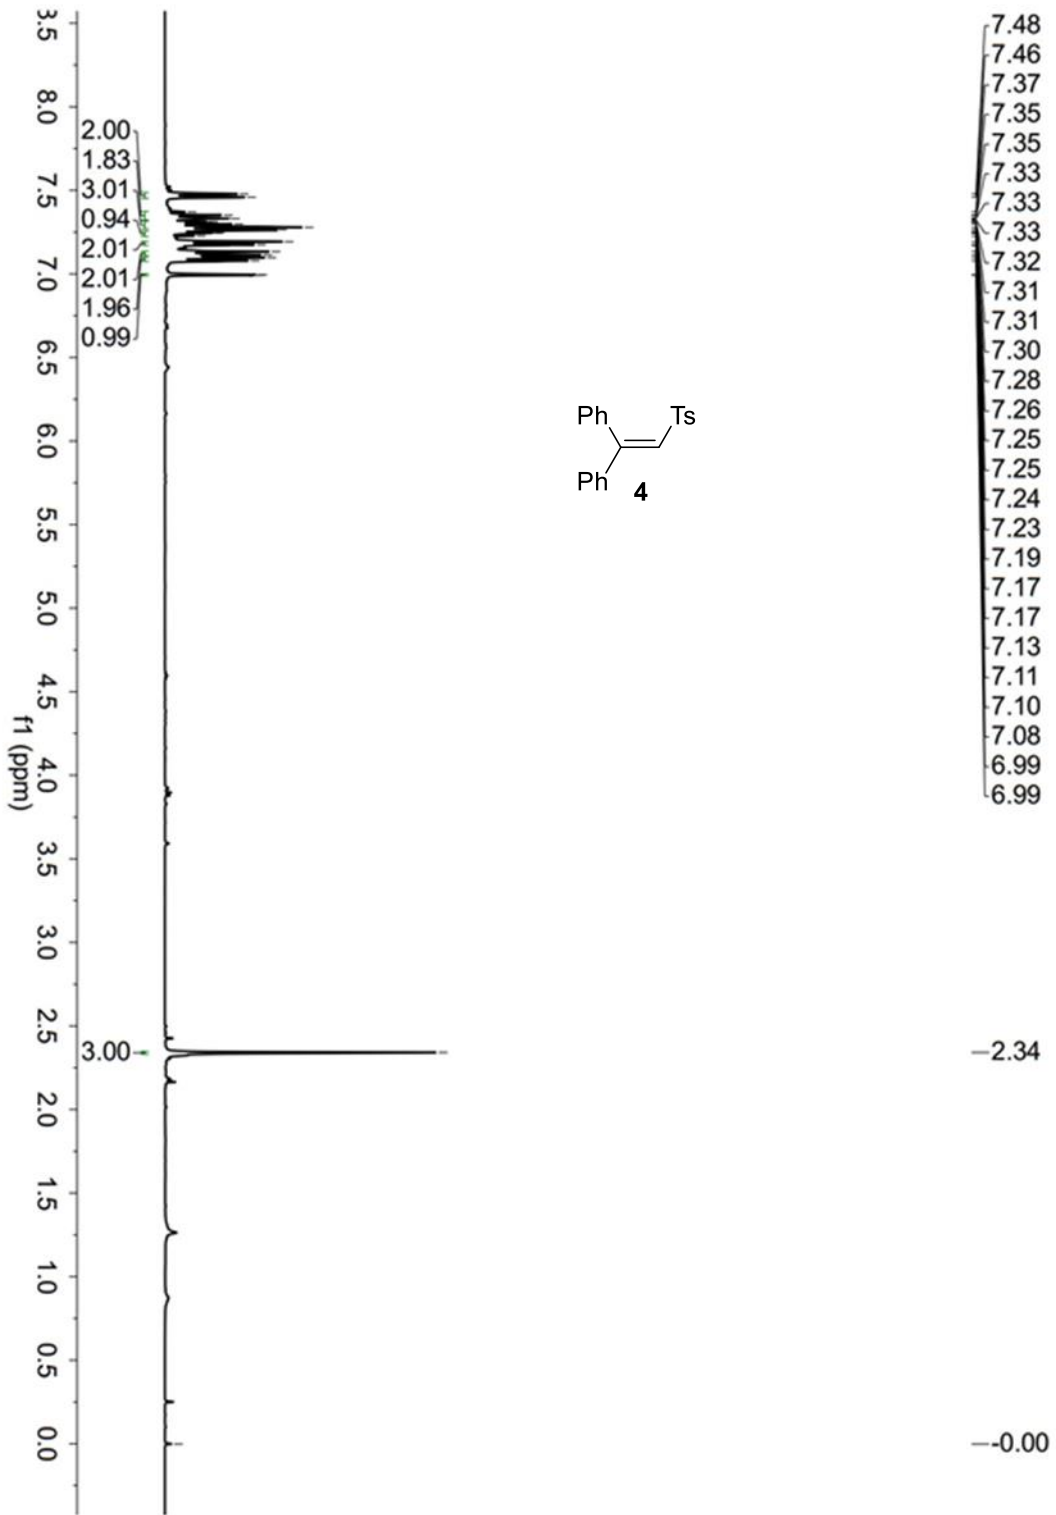



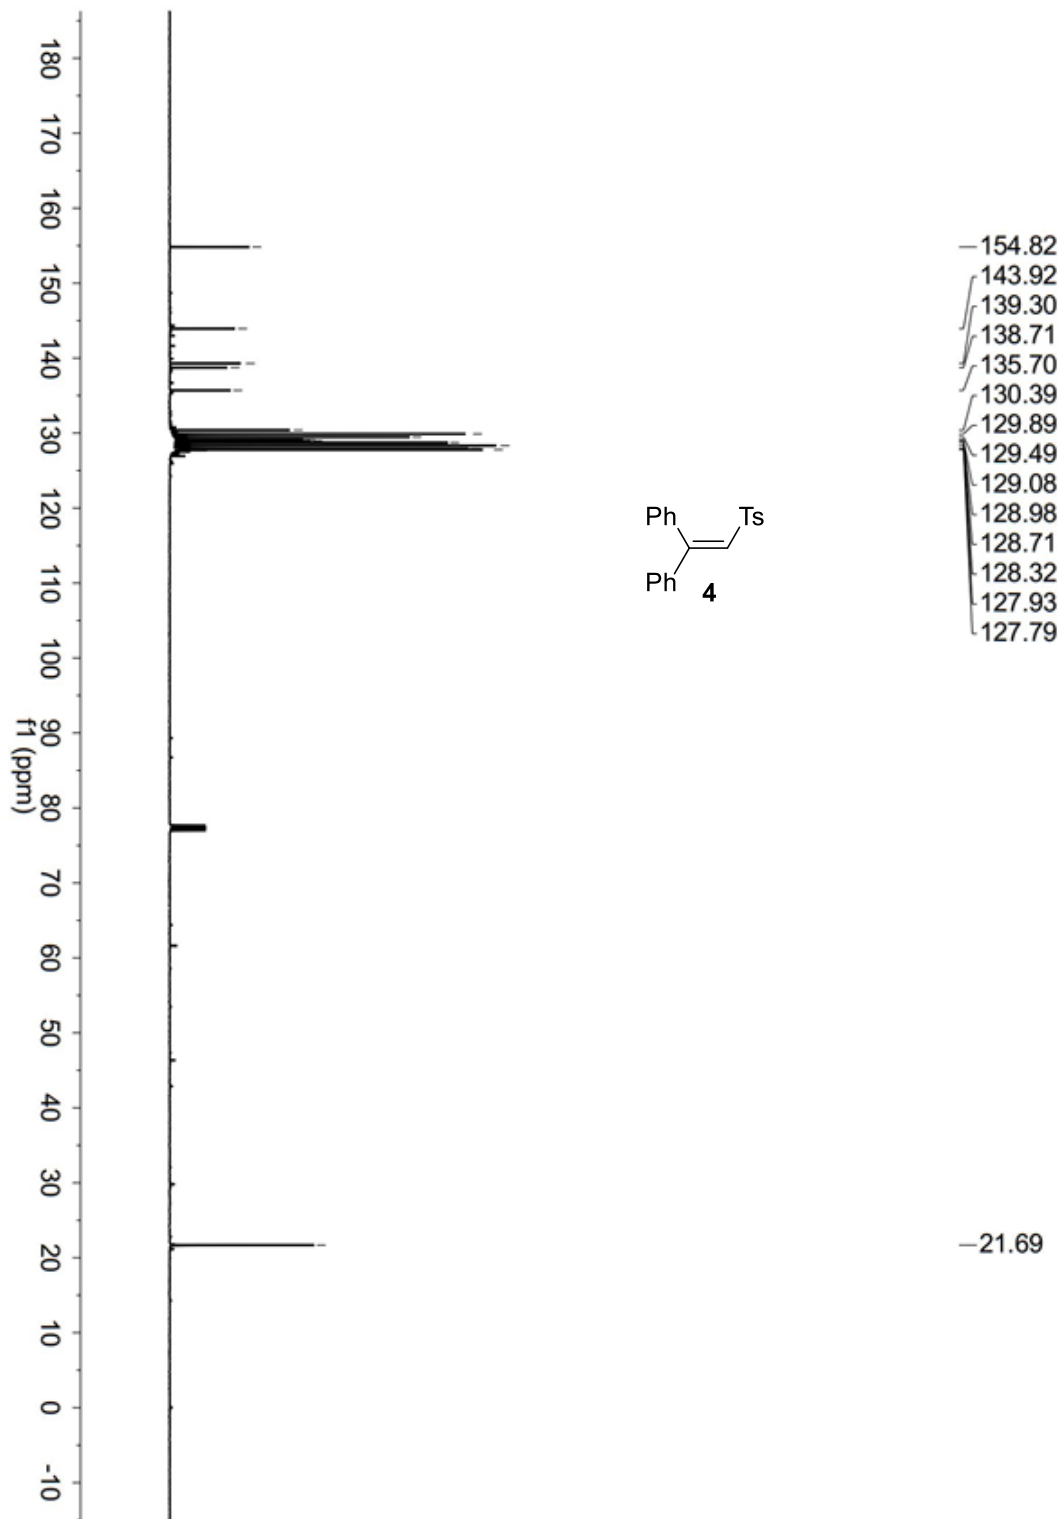

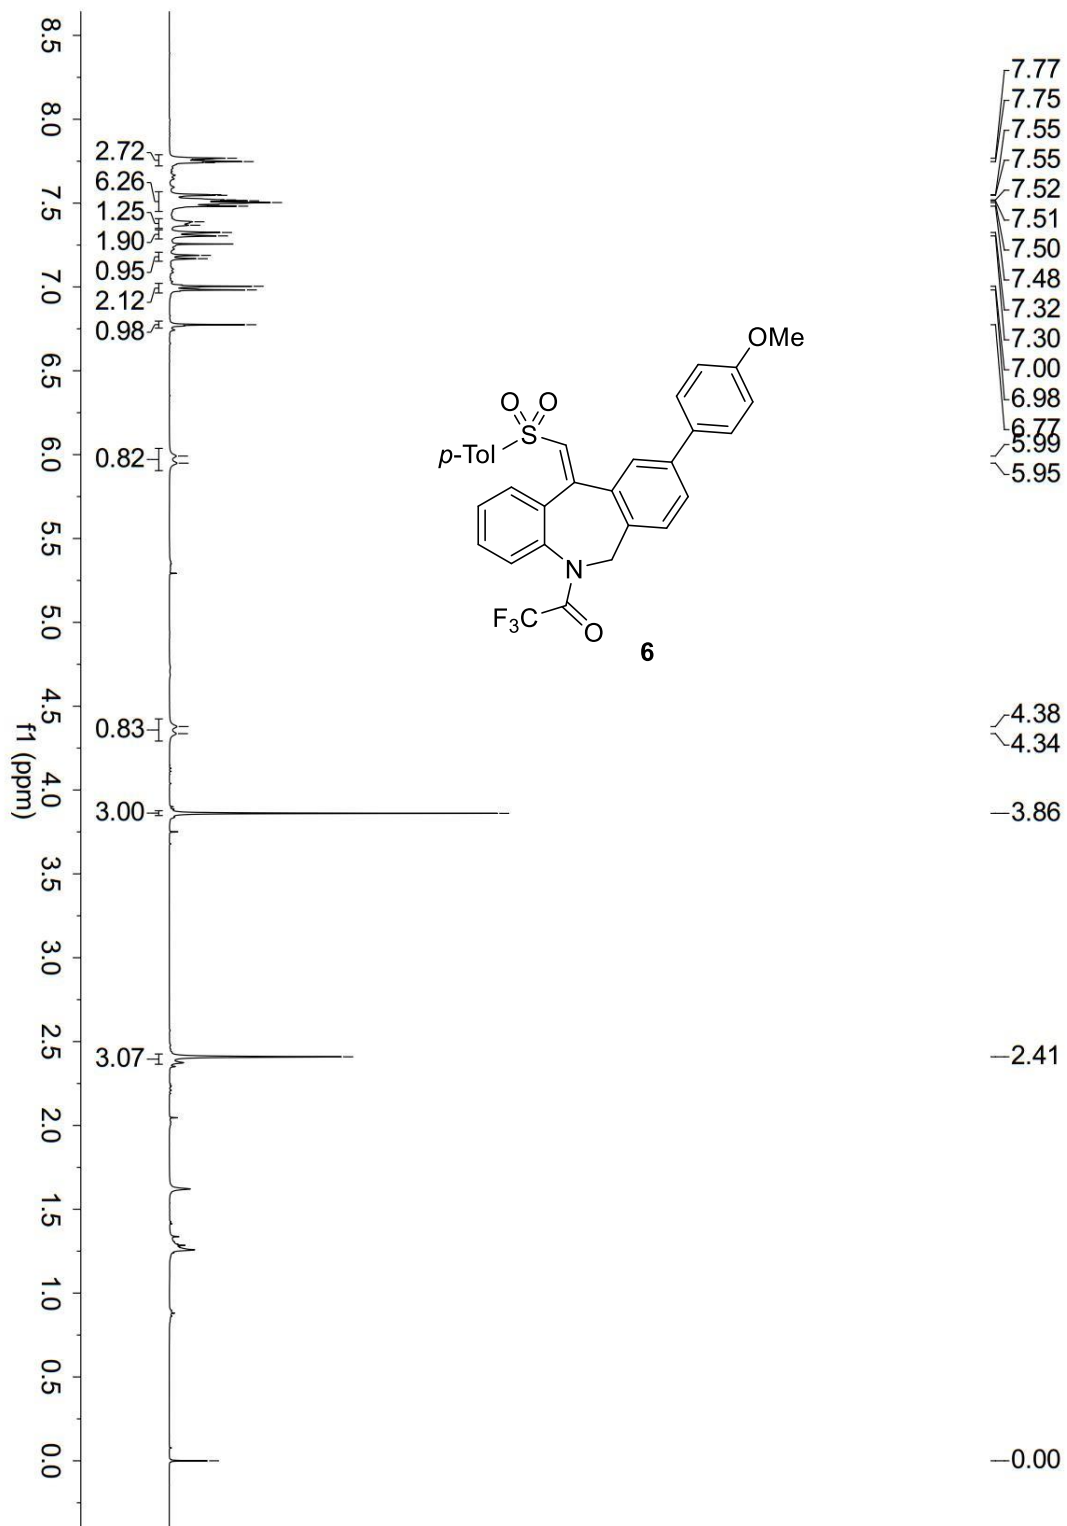

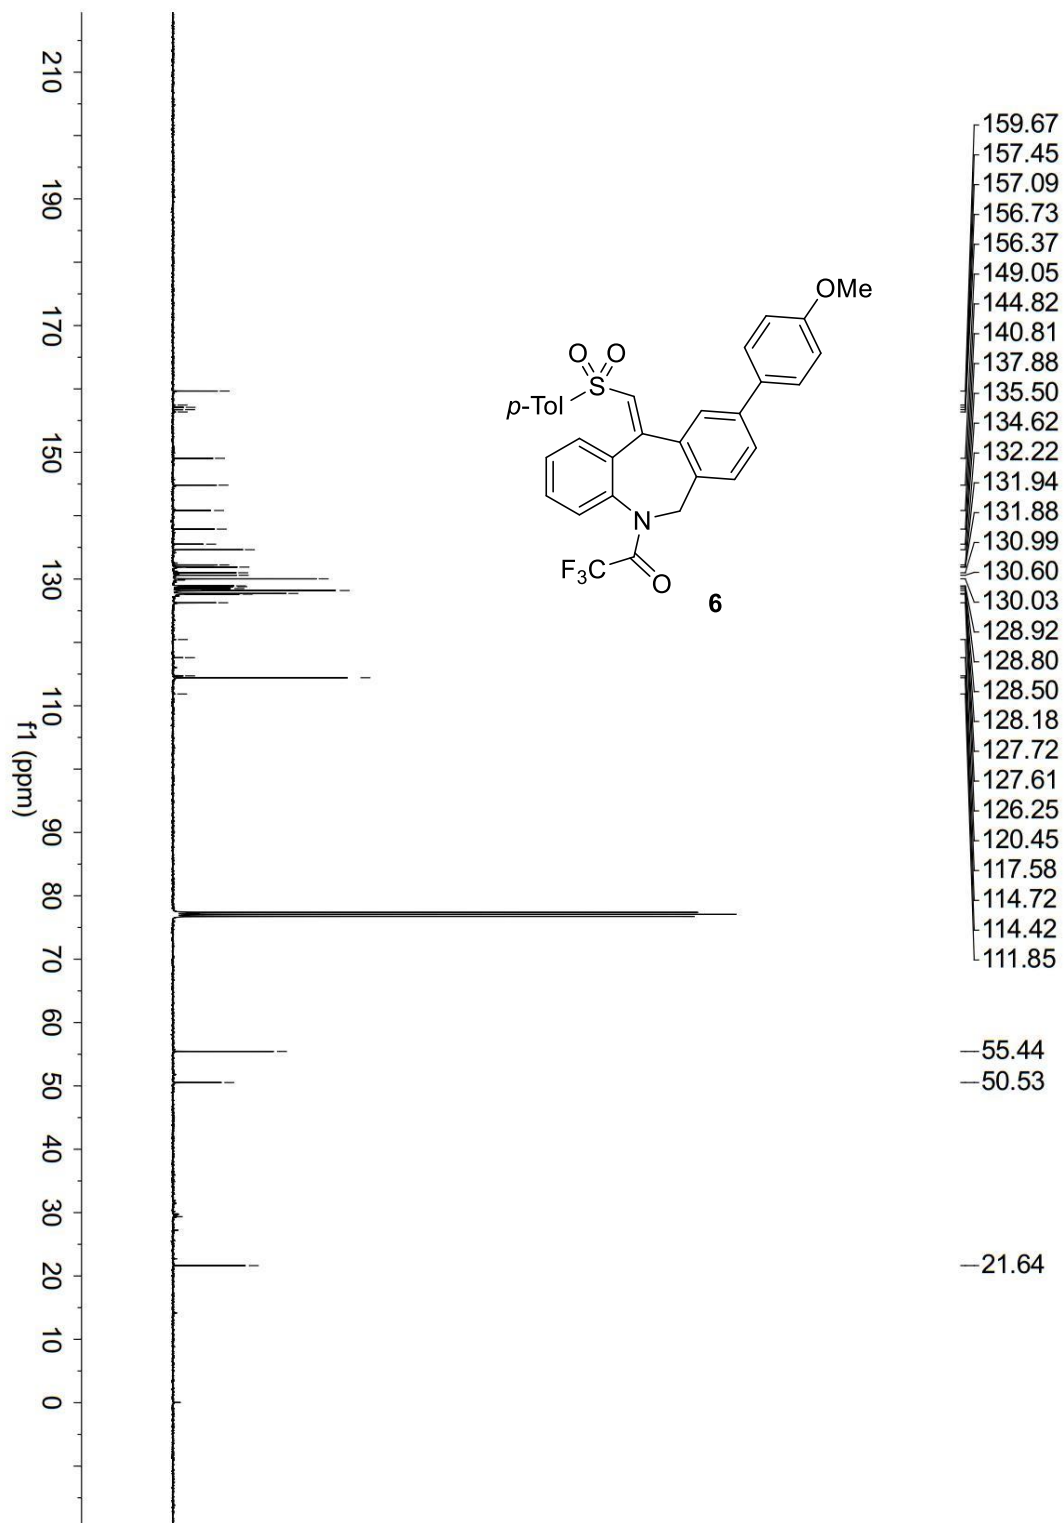

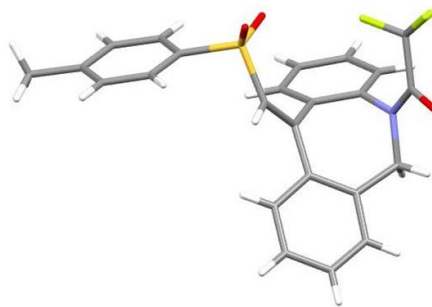

Table 1. Crystal data and structure refinement for **3a**.

|                                 |                                                                   |                 |
|---------------------------------|-------------------------------------------------------------------|-----------------|
| Identification code             | ga_200108e_a                                                      |                 |
| Empirical formula               | C <sub>24</sub> H <sub>18</sub> F <sub>3</sub> N O <sub>3</sub> S |                 |
| Formula weight                  | 457.45                                                            |                 |
| Temperature                     | 293(2) K                                                          |                 |
| Wavelength                      | 1.34138 Å                                                         |                 |
| Crystal system                  | Triclinic                                                         |                 |
| Space group                     | P-1                                                               |                 |
| Unit cell dimensions            | a = 9.1482(9) Å                                                   | α = 98.241(3)°. |
|                                 | b = 12.6677(13) Å                                                 | β = 97.455(3)°. |
|                                 | c = 19.356(2) Å                                                   | γ = 99.310(3)°. |
| Volume                          | 2163.7(4) Å <sup>3</sup>                                          |                 |
| Z                               | 4                                                                 |                 |
| Density (calculated)            | 1.404 Mg/m <sup>3</sup>                                           |                 |
| Absorption coefficient          | 1.168 mm <sup>-1</sup>                                            |                 |
| F(000)                          | 944                                                               |                 |
| Crystal size                    | 0.400 x 0.350 x 0.220 mm <sup>3</sup>                             |                 |
| Theta range for data collection | 4.065 to 58.498°.                                                 |                 |
| Index ranges                    | -11 ≤ h ≤ 11, -16 ≤ k ≤ 16, -24 ≤ l ≤ 24                          |                 |
| Reflections collected           | 80905                                                             |                 |
| Independent reflections         | 9246 [R(int) = 0.0495]                                            |                 |
| Completeness to theta = 53.594° | 99.1 %                                                            |                 |

|                                      |                                             |
|--------------------------------------|---------------------------------------------|
| Absorption correction                | Semi-empirical from equivalents             |
| Max. and min. transmission           | 0.752 and 0.668                             |
| Refinement method                    | Full-matrix least-squares on F <sup>2</sup> |
| Data / restraints / parameters       | 9246 / 39 / 607                             |
| Goodness-of-fit on F <sup>2</sup>    | 1.061                                       |
| Final R indices [ $I > 2\sigma(I)$ ] | R1 = 0.0575, wR2 = 0.1786                   |
| R indices (all data)                 | R1 = 0.0598, wR2 = 0.1815                   |
| Extinction coefficient               | n/a                                         |
| Largest diff. peak and hole          | 0.630 and -0.469 e.Å <sup>-3</sup>          |
